# Supplementary material for: Statistical tools used for analyses of frequent users of emergency department: a scoping review
Source: PubMed Central journal article supplement — BMJ Open. 2019 May 24;9(5):e027750. doi: 10.1136/bmjopen-2018-027750 (PMC6537981; doi:10.1136/bmjopen-2018-027750), 2019-05-24

# BMJ Open

BMJ Open is committed to open peer review. As part of this commitment we make the peer review history of every article we publish publicly available.

When an article is published we post the peer reviewers' comments and the authors' responses online. We also post the versions of the paper that were used during peer review. These are the versions that the peer review comments apply to.

The versions of the paper that follow are the versions that were submitted during the peer review process. They are not the versions of record or the final published versions. They should not be cited or distributed as the published version of this manuscript.

BMJ Open is an open access journal and the full, final, typeset and author-corrected version of record of the manuscript is available on our site with no access controls, subscription charges or pay-per-view fees (<http://bmjopen.bmj.com>).

If you have any questions on BMJ Open's open peer review process please email [info.bmjopen@bmj.com](mailto:info.bmjopen@bmj.com)

# BMJ Open

## Statistical tools used for analyses of frequent users of emergency department: A scoping review

|                               |                                                                                                                                                                                                                                                                                                                                                                                                                                                                                                                                                                                                                          |
|-------------------------------|--------------------------------------------------------------------------------------------------------------------------------------------------------------------------------------------------------------------------------------------------------------------------------------------------------------------------------------------------------------------------------------------------------------------------------------------------------------------------------------------------------------------------------------------------------------------------------------------------------------------------|
| Journal:                      | <i>BMJ Open</i>                                                                                                                                                                                                                                                                                                                                                                                                                                                                                                                                                                                                          |
| Manuscript ID                 | bmjopen-2018-027750                                                                                                                                                                                                                                                                                                                                                                                                                                                                                                                                                                                                      |
| Article Type:                 | Research                                                                                                                                                                                                                                                                                                                                                                                                                                                                                                                                                                                                                 |
| Date Submitted by the Author: | 06-Nov-2018                                                                                                                                                                                                                                                                                                                                                                                                                                                                                                                                                                                                              |
| Complete List of Authors:     | Chiu, Yohann; Université de Sherbrooke, Department of family medicine and emergency medicine<br>Racine-Hemmings, François; Université de Sherbrooke, Department of family medicine and emergency medicine<br>Vanasse, Alain; University of Sherbrooke, Department of family medicine and emergency medicine<br>Chouinard, Maud-Christine; Université du Québec à Chicoutimi, Département des sciences de la santé<br>Bisson, Mathieu; Université de Sherbrooke, Department of family medicine and emergency medicine<br>Hudon, Catherine; Université de Sherbrooke, Department of family medicine and emergency medicine |
| Keywords:                     | STATISTICS & RESEARCH METHODS, ACCIDENT & EMERGENCY MEDICINE, FREQUENT USERS                                                                                                                                                                                                                                                                                                                                                                                                                                                                                                                                             |
|                               |                                                                                                                                                                                                                                                                                                                                                                                                                                                                                                                                                                                                                          |

SCHOLARONE™  
Manuscripts

1  
2  
3  
4 1 Statistical tools used for analyses of frequent users  
5  
6 2 of emergency department: A scoping review  
7  
8 3

10 4 Yohann M. Chiu<sup>1\*</sup>, François Racine-Hemmings<sup>1</sup>, Alain Vanasse<sup>1</sup>,  
11  
12  
13 5 Maud-Christine Chouinard<sup>2</sup>, Mathieu Bisson<sup>1</sup>, Catherine Hudon<sup>1</sup>  
14  
15

16  
17 6 <sup>1</sup> Département de médecine de famille et de médecine d'urgence, Université  
18  
19 7 de Sherbrooke, Sherbrooke, Québec, Canada  
20  
21

22  
23 8 <sup>2</sup> Département des sciences de la santé, Université du Québec à Chicoutimi,  
24  
25 9 Chicoutimi, Québec, Canada  
26  
27

28  
29 10 \* Correspondence: [Yohann.Chiu@USherbrooke.ca](mailto:Yohann.Chiu@USherbrooke.ca)  
30  
31

32 11  
33  
34  
35  
36  
37  
38  
39  
40  
41  
42  
43  
44  
45  
46  
47  
48  
49  
50  
51  
52  
53  
54  
55  
56  
57  
58  
59  
60

## 12 **Abstract**

13 **Objective:** Frequent users represent a small proportion of emergency department users,  
14 but they account for a disproportionately large number of visits. Their ED use is often  
15 considered suboptimal, as it would be more optimal to identify those patients earlier in  
16 their health problem trajectory, in order to treat them more efficiently. It is therefore  
17 essential to describe their characteristics and to predict their emergency department use. In  
18 order to do so, adequate statistical tools are needed. The objective of this study was to  
19 determine the statistical tools used in identifying variables associated with frequent use or  
20 predicting the risk of becoming a frequent user.

21 **Methods:** We performed a scoping review following an established 5-stage  
22 methodological framework. We searched PubMed, Scopus, and CINAHL databases in  
23 September 2017 using search strategies defined with the help of an information specialist.  
24 Out of 3 228 potential abstracts, we selected 85 articles based on defined criteria and  
25 presented in a content analysis.

26 **Results:** We identified four classes of statistical tools. Regression models were found to  
27 be the most common practice, followed by hypothesis testing. The logistic regression was  
28 found to be the most used statistical tool, followed by chi-square test and t-test of  
29 associations between variables. Other tools were marginally used.

30 **Conclusions:** This scoping review lists common statistical tools used for analyzing  
31 frequent users in emergency departments. It highlights the fact that some are well  
32 established while others are much less so. More research is needed to apply appropriate  
33 techniques to health data or to diversify statistical point of views.

1  
2  
3  
4 34 **Article summary**  
5

6  
7 35 **Strengths and limitations of this study**  
8

- 9  
10 36 • First overview of statistical tools used in frequent users analysis  
11  
12 37 • Follows a well-defined methodological framework in an extensive body of  
13  
14 38 literature  
15  
16  
17 39 • Quality assessment is not performed in a scoping review  
18  
19 40 • Studies in other languages than English or French might have been missed  
20  
21

22  
23 41  
24  
25  
26  
27  
28  
29  
30  
31  
32  
33  
34  
35  
36  
37  
38  
39  
40  
41  
42  
43  
44  
45  
46  
47  
48  
49  
50  
51  
52  
53  
54  
55  
56  
57  
58  
59  
60

## 1. Background

Emergency department (ED) “frequent users” are a sub-group of ED users that make repeated, multiple visits during a given amount of time. Though there is no consensual definition for frequent users, thresholds in the literature range from two to more than ten ED visits per year [1, 2], while the most common one is more than four ED visits per year [1, 2]. Frequent users represent a small proportion of ED users but account for a large number of visits [3-5]. They often display complex characteristics such as low socioeconomic status combined with physical and mental health issues [6]. As such, their ED use is considered suboptimal [7], as the best strategy would be to identify those patients at an earlier stage in their health problem trajectory, in order to treat them more efficiently [8]. Furthermore, frequent users’ visits may lead to overcrowding in EDs and decreased quality of care [2]. Identifying factors that best describe those users and predict their ED use is therefore an essential task to improve ED care as well as frequent users’ health problems. Adequate statistical tools are needed to that end. Although they are numerous, no literature review has been published yet about statistical tools used for analyzing ED frequent users. Therefore, the aim of our study was to draw up a list of statistical tools used in identifying variables associated with frequent use or predicting the risk of becoming a frequent user.

## 2. Methods

In order to list the statistical tools used in describing variables associated with and prediction of frequent ED use, we conducted a scoping review. We followed the 5-stage methodology of Arksey and O'Malley [9] adapted by Levac *et al.* [10]. The methodological

1  
2  
3 64 framework of a scoping review allows “mapping rapidly the key concepts underpinning a  
4  
5 65 research area and the main sources and types of evidence available” [11], thus allowing us  
6  
7  
8 66 to identify gaps in the literature and future research opportunities.  
9

### 10 11 67 **Stage 1: Identifying the research question** 12

13  
14 68 We defined our research question as follows: What statistical tools are used in the  
15  
16 69 identification of variables associated with frequent ED users and in their prediction?  
17

### 18 19 70 **Stage 2: Identifying relevant studies** 20

21  
22 71 We searched PubMed, CINAHL, and Scopus databases in September 2017, using search  
23  
24 72 strategies developed with the help of an information specialist (see the supplementary  
25  
26 73 appendix for the complete search strategy). Keywords included variants of “frequent  
27  
28 74 users”, “emergency departments” and “statistical tools”.  
29

30  
31  
32 75 There were no restrictions regarding the population age or sex, health conditions, study  
33  
34 76 period or country.  
35

### 36 37 77 **Stage 3: Study selection** 38

39  
40 78 Articles written in French or in English were included using the following criteria:  
41

- 42  
43 79 • The study must focus on frequent users of EDs (studies focusing on re-visits or on  
44  
45 80 frequent visits other than in EDs were excluded);  
46  
47  
48 81 • The study must have an explicit definition of frequent users, such as four visits in  
49  
50 82 one year (reviews were excluded);  
51  
52  
53  
54  
55  
56  
57  
58  
59  
60

- 1  
2  
3 83 • The study must use at least one statistical tool that is classified as inferential (not  
4  
5 84 descriptive, as defined by The Cambridge Dictionary of Statistics [12]), such as  
6  
7  
8 85 hypothesis tests, regression models, decision trees, or others;  
9  
10 86 • The study's objectives must include identifying variables associated with frequent  
11  
12 87 use or predicting the risk of becoming a frequent user.  
13  
14

15 88 We collected 3 228 potential abstracts (Fig 1). Of those, 32 were duplicates, and 3 087  
16  
17 89 were excluded by an investigator (YC) after reading the title and the abstract. YC and CH  
18  
19 90 independently evaluated the remaining 109 full-text articles, of which 80 matched the  
20  
21 91 above criteria. Those were included by consensus between YC and CH while FRH acted  
22  
23 92 as third reviewer in case of discrepancy. Reasons for exclusion were: duplicate (one), not  
24  
25 93 in French or English (one), no inferential statistics (three), focus not on ED (four),  
26  
27 94 systematic review (four), no explicit definition of frequent users (five), no description or  
28  
29 95 prediction of frequent users (eleven). A reference search yielded five relevant articles.  
30  
31 96 Thus, 85 articles were included in this study, of which the full texts were examined by YC,  
32  
33 97 CH, and MB.  
34  
35  
36  
37  
38

39 98 **Fig 1. PRISMA flow diagram.**

#### 40 41 99 **Stage 4: Charting the data**

42  
43  
44 100 YC and MB independently extracted the corresponding data. Reported characteristics  
45  
46 101 were the first (two) author(s), the publication year, the study location, the population, the  
47  
48 102 frequent users' definition, the objectives, the sample size, and the statistical tools used  
49  
50 103 concerning the research question.  
51  
52  
53  
54  
55  
56  
57  
58  
59  
60



## 104 Stage 5: Collating, summarizing and reporting the results

105 The results are reported via a content analysis [13].

## 106 Patient and public involvement

107 Patients or public were not involved in this study.

## 108 3. Results

109 The studies main characteristics are presented in Table 1. Out of 85 studies, 47 were  
 110 conducted in the USA, 13 in Canada and 5 in Australia (Fig 2). The various statistical tools  
 111 were classified into four main categories: regression, hypothesis testing, machine learning,  
 112 and other tools.

113 Table 1. Main characteristics of the 86 included studies.

| Authors, year, and country                            | Population         | Frequent user definition | Study objectives                                                                                                                                                          | Sample size | Statistical tools used                                                                  |
|-------------------------------------------------------|--------------------|--------------------------|---------------------------------------------------------------------------------------------------------------------------------------------------------------------------|-------------|-----------------------------------------------------------------------------------------|
| Aagaard, J. et al.<br>2013<br>Denmark                 | Psychiatric        | $\geq 5$ visits per year | To identify predictors of frequent use of a psychiatric emergency room                                                                                                    | 8 034       | Logistic regression                                                                     |
| Adams, R.J. et al.<br>2000<br>Australia               | Adults with asthma | $\geq 2$ visits per year | To identify whether factors other than severity and low socioeconomic status were associated with this disproportionate use                                               | 293         | Logistic regression                                                                     |
| Alghanim, S.A. & Alomar, B.A.<br>2015<br>Saudi Arabia | All                | $\geq 3$ visits per year | To determine the prevalence of frequent use of EDs in public hospitals, to determine factors associated with such use, and to identify patients' reasons for frequent use | 666         | Chi-square test<br>Logistic regression                                                  |
| Alpern, E.R. et al.<br>2014<br>United States          | All                | $\geq 4$ visits per year | To describe the epidemiology of and risk factors for recurrent and high frequency use of the ED by children                                                               | 695 188     | Negative binomial regression<br>Logistic regression<br>Generalized estimating equations |
| Andren, K.G. & Rosenqvist, U.                         | All                | $\geq 4$ visits per year | To follow a cohort of heavy ED users with regard to changes in                                                                                                            | 232         | Decision trees<br>Linear regression                                                     |

|                                                     |                     |                                                                                                               |  |                                                                                                                                                                                                                              |         |                                                                   |
|-----------------------------------------------------|---------------------|---------------------------------------------------------------------------------------------------------------|--|------------------------------------------------------------------------------------------------------------------------------------------------------------------------------------------------------------------------------|---------|-------------------------------------------------------------------|
| 1987<br>Sweden                                      |                     |                                                                                                               |  | medical and psycho-social profiles and ED use and to identify predictors for a maintained high use of ED services and the relationship between changes in access to social networks and utilization of medical care services |         |                                                                   |
| Arfken, C.L. et al.<br>2004<br>United States        | Psychiatric         | $\geq 6$ visits per year                                                                                      |  | To identify risk factors for people who use psychiatric emergency services repeatedly and to estimate their financial charges                                                                                                | 74      | Logistic regression                                               |
| Beck, A. et al.<br>2016<br>United Kingdom           | Mental health       | $\geq 3$ visits in 3 months                                                                                   |  | To statistically identify characteristics associated with a shorter time to re-attendance and a higher number of overall ED admissions with a Mental Health Liaison Service referral                                         | 24 010  | Cox regression<br>Negative binomial regression                    |
| Bieler, G. et al.<br>2012<br>Switzerland            | All                 | $\geq 4$ visits per year                                                                                      |  | To identify the social and medical factors associated with frequent ED use and to determine if frequent users were more likely to have a combination of these factors in a universal health insurance system                 | 719     | Wilcoxon rank-sum test<br>Logistic regression                     |
| Billings, J. & Raven, M.C.<br>2013<br>United States | All                 | $\geq 3$ visits per year<br>$\geq 5$ visits per year<br>$\geq 8$ visits per year<br>$\geq 10$ visits per year |  | To examine whether it is possible to predict who will become a frequent ED user with predictive modeling and to compare ED expenditures to total Medicaid services expenditures                                              | 212 259 | Logistic regression                                               |
| Blonigen, D.M. et al.<br>2017<br>United States      | Veteran psychiatric | $\geq 5$ visits per year                                                                                      |  | To identify patient-level factors associated with ED use among veteran psychiatric patients and to examine factors associated with different subgroups of ED users including “high utilizers”                                | 226 122 | Zero-truncated negative binomial regression                       |
| Boyer, L. et al.<br>2011<br>France                  | Psychiatric         | $\geq 6$ visits per year                                                                                      |  | To examine characteristics of frequent visitors to a psychiatric emergency service in a French public teaching hospital over six years                                                                                       | 1 285   | Logistic regression                                               |
| Brennan, J.J. et al.<br>2014                        | Psychiatric         | $\geq 4$ visits per year                                                                                      |  | To assess the incidence of psychiatric visits among frequent ED users and                                                                                                                                                    | 788 005 | Kruskal-Wallis test<br>Mann-Whitney U test<br>Logistic regression |

|    |                          |                                                       |                                                                         |                                                                                                                                                                                                                                            |                              |                                                                                              |
|----|--------------------------|-------------------------------------------------------|-------------------------------------------------------------------------|--------------------------------------------------------------------------------------------------------------------------------------------------------------------------------------------------------------------------------------------|------------------------------|----------------------------------------------------------------------------------------------|
| 1  | United States            |                                                       |                                                                         | utilization among frequent psychiatric users                                                                                                                                                                                               |                              |                                                                                              |
| 2  |                          |                                                       |                                                                         |                                                                                                                                                                                                                                            |                              |                                                                                              |
| 3  | Buhumaid, R. et al.      | Psychiatric                                           | $\geq 4$ visits per year                                                | To evaluate demographic factors associated with increased ED use among people with psychiatric conditions                                                                                                                                  | 569                          | Logistic regression                                                                          |
| 4  | 2015                     |                                                       |                                                                         |                                                                                                                                                                                                                                            |                              |                                                                                              |
| 5  | United States            |                                                       |                                                                         |                                                                                                                                                                                                                                            |                              |                                                                                              |
| 6  |                          |                                                       |                                                                         |                                                                                                                                                                                                                                            |                              |                                                                                              |
| 7  | Cabey, W.V. et al.       | All                                                   | 90th percentile                                                         | To define the threshold and population factors associated with pediatric ED use above the norm during the first 36 months of life                                                                                                          | 16 664                       | Nonparametric distribution fit<br>Logistic regression<br>Bootstrap<br>Clopper-Pearson method |
| 8  | 2014                     |                                                       |                                                                         |                                                                                                                                                                                                                                            |                              |                                                                                              |
| 9  | United States            |                                                       |                                                                         |                                                                                                                                                                                                                                            |                              |                                                                                              |
| 10 |                          |                                                       |                                                                         |                                                                                                                                                                                                                                            |                              |                                                                                              |
| 11 | Castner, J. et al.       | People with psychiatric and substance abuse diagnoses | $\geq 3$ visits per year                                                | To stratify individuals by overall health complexity and examine the relationship of behavioral health diagnoses (psychiatric and substance abuse) as well as frequent treat-and-release ED utilization in a cohort of Medicaid recipients | 56 491                       | Logistic regression                                                                          |
| 12 | 2015                     |                                                       |                                                                         |                                                                                                                                                                                                                                            |                              |                                                                                              |
| 13 | United States            |                                                       |                                                                         |                                                                                                                                                                                                                                            |                              |                                                                                              |
| 14 |                          |                                                       |                                                                         |                                                                                                                                                                                                                                            |                              |                                                                                              |
| 15 |                          |                                                       |                                                                         |                                                                                                                                                                                                                                            |                              |                                                                                              |
| 16 | Chambers, C. et al.      | Homeless                                              | 90th percentile                                                         | To identify predictors of ED use among a population-based prospective cohort of homeless adults in Toronto, Ontario                                                                                                                        | 1 165                        | Logistic regression                                                                          |
| 17 | 2013                     |                                                       |                                                                         |                                                                                                                                                                                                                                            |                              |                                                                                              |
| 18 | Canada                   |                                                       |                                                                         |                                                                                                                                                                                                                                            |                              |                                                                                              |
| 19 |                          |                                                       |                                                                         |                                                                                                                                                                                                                                            |                              |                                                                                              |
| 20 | Chang, G. et al.         | Psychiatric                                           | $\geq 4$ visits per year or $\geq 3$ visits during 2 consecutive months | To identify the patient characteristics associated with frequent ED use and develop a tool to predict risk for returning in the next month                                                                                                 | 863                          | Chi-square test<br>Logistic regression                                                       |
| 21 | 2014                     |                                                       |                                                                         |                                                                                                                                                                                                                                            |                              |                                                                                              |
| 22 | United States            |                                                       |                                                                         |                                                                                                                                                                                                                                            |                              |                                                                                              |
| 23 |                          |                                                       |                                                                         |                                                                                                                                                                                                                                            |                              |                                                                                              |
| 24 |                          |                                                       |                                                                         |                                                                                                                                                                                                                                            |                              |                                                                                              |
| 25 |                          |                                                       |                                                                         |                                                                                                                                                                                                                                            |                              |                                                                                              |
| 26 | Christensen, E.W. et al. | All                                                   | $\geq 4$ visits per year                                                | To determine the patient characteristics and health care utilization patterns that predict frequent ED use ( $\geq 4$ visits per year) over time to assist health care organizations in targeting patients for care management             | 13 265                       | Zero-inflated Poisson regression<br>Receiver operating characteristic curve                  |
| 27 | 2017                     |                                                       |                                                                         |                                                                                                                                                                                                                                            |                              |                                                                                              |
| 28 | United States            |                                                       |                                                                         |                                                                                                                                                                                                                                            |                              |                                                                                              |
| 29 |                          |                                                       |                                                                         |                                                                                                                                                                                                                                            |                              |                                                                                              |
| 30 |                          |                                                       |                                                                         |                                                                                                                                                                                                                                            |                              |                                                                                              |
| 31 | Chukmaitov, A.S. et al.  | People with ambulatory care-sensitive conditions      | $\geq 4$ visits per year                                                | To study characteristics of all, occasional, and frequent ED visits due to ambulatory care-sensitive conditions                                                                                                                            | 4 914 933 (number of visits) | Logistic regression                                                                          |
| 32 | 2012                     |                                                       |                                                                         |                                                                                                                                                                                                                                            |                              |                                                                                              |
| 33 | United States            |                                                       |                                                                         |                                                                                                                                                                                                                                            |                              |                                                                                              |
| 34 |                          |                                                       |                                                                         |                                                                                                                                                                                                                                            |                              |                                                                                              |
| 35 | Colligan, E.M. et al.    | All                                                   | $\geq 4$ visits per year                                                | To examine factors associated with persistent frequent ED use during a 2-year period among Medicare beneficiaries                                                                                                                          | 5 400 237                    | Logistic regression                                                                          |
| 36 | 2016                     |                                                       |                                                                         |                                                                                                                                                                                                                                            |                              |                                                                                              |
| 37 | United States            |                                                       |                                                                         |                                                                                                                                                                                                                                            |                              |                                                                                              |
| 38 |                          |                                                       |                                                                         |                                                                                                                                                                                                                                            |                              |                                                                                              |
| 39 |                          |                                                       |                                                                         |                                                                                                                                                                                                                                            |                              |                                                                                              |
| 40 |                          |                                                       |                                                                         |                                                                                                                                                                                                                                            |                              |                                                                                              |
| 41 |                          |                                                       |                                                                         |                                                                                                                                                                                                                                            |                              |                                                                                              |
| 42 |                          |                                                       |                                                                         |                                                                                                                                                                                                                                            |                              |                                                                                              |
| 43 |                          |                                                       |                                                                         |                                                                                                                                                                                                                                            |                              |                                                                                              |
| 44 |                          |                                                       |                                                                         |                                                                                                                                                                                                                                            |                              |                                                                                              |
| 45 |                          |                                                       |                                                                         |                                                                                                                                                                                                                                            |                              |                                                                                              |
| 46 |                          |                                                       |                                                                         |                                                                                                                                                                                                                                            |                              |                                                                                              |
| 47 |                          |                                                       |                                                                         |                                                                                                                                                                                                                                            |                              |                                                                                              |
| 48 |                          |                                                       |                                                                         |                                                                                                                                                                                                                                            |                              |                                                                                              |
| 49 |                          |                                                       |                                                                         |                                                                                                                                                                                                                                            |                              |                                                                                              |
| 50 |                          |                                                       |                                                                         |                                                                                                                                                                                                                                            |                              |                                                                                              |
| 51 |                          |                                                       |                                                                         |                                                                                                                                                                                                                                            |                              |                                                                                              |
| 52 |                          |                                                       |                                                                         |                                                                                                                                                                                                                                            |                              |                                                                                              |
| 53 |                          |                                                       |                                                                         |                                                                                                                                                                                                                                            |                              |                                                                                              |
| 54 |                          |                                                       |                                                                         |                                                                                                                                                                                                                                            |                              |                                                                                              |
| 55 |                          |                                                       |                                                                         |                                                                                                                                                                                                                                            |                              |                                                                                              |
| 56 |                          |                                                       |                                                                         |                                                                                                                                                                                                                                            |                              |                                                                                              |
| 57 |                          |                                                       |                                                                         |                                                                                                                                                                                                                                            |                              |                                                                                              |
| 58 |                          |                                                       |                                                                         |                                                                                                                                                                                                                                            |                              |                                                                                              |
| 59 |                          |                                                       |                                                                         |                                                                                                                                                                                                                                            |                              |                                                                                              |
| 60 |                          |                                                       |                                                                         |                                                                                                                                                                                                                                            |                              |                                                                                              |

|                                                |                                    |                                                                                          |                                                                                                                                                                           |         |                                                                                                                                                                          |
|------------------------------------------------|------------------------------------|------------------------------------------------------------------------------------------|---------------------------------------------------------------------------------------------------------------------------------------------------------------------------|---------|--------------------------------------------------------------------------------------------------------------------------------------------------------------------------|
|                                                |                                    |                                                                                          |                                                                                                                                                                           |         | Wilcoxon rank-sum test<br>Chi-square test<br>LASSO logistic regression<br>Regularized logistic regression<br>Decision trees<br>Random forests<br>Support vector machines |
| Das, L.T. et al.<br>2017<br>United States      | Children with asthma               | $\geq 2$ visits per year                                                                 | To explore the predictability of frequent ED use among children with asthma using data from an EHR from one medical center                                                | 2 691   |                                                                                                                                                                          |
| Doran, K.M. et al.<br>2013<br>United States    | All                                | 2-4 visits per year<br>5-10 visits per year<br>11-25 visits per year<br>$\geq 25$ visits | To identify sociodemographic and clinical factors most strongly associated with frequent ED use within the Veterans Health Administration nationally                      | 930 712 | Logistic regression                                                                                                                                                      |
| Doran, K.M. et al.<br>2014<br>United States    | All                                | $\geq 3$ visits per year                                                                 | To examine patients' reasons for using the ED for low-acuity health complaints, and determine whether reasons differed for frequent ED users versus non-frequent ED users | 940     | Logistic regression                                                                                                                                                      |
| Doupe, M.B. et al.<br>2012<br>Canada           | All                                | $\geq 7$ visits per year                                                                 | To identify factors that define frequent and highly frequent ED users                                                                                                     | 105 687 | Logistic regression<br>Receiver operating characteristic curve                                                                                                           |
| Fernandes, A.K. et al.<br>2003<br>Brazil       | All                                | $\geq 3$ visits per year                                                                 | To identify characteristics related to poor disease control and frequent visits to the ED to apply appropriate clinical management                                        | 86      | Chi-square test<br>Logistic regression                                                                                                                                   |
| Freitag, F.G. et al.<br>2005<br>United States  | People with chronic daily headache | $\geq 3$ visits per year                                                                 | To examine the characteristics of chronic daily headache sufferers who use EDs and identify factors predictive of ED visits                                               | 785     | Wilcoxon rank-sum test<br>t-test<br>Chi-square test<br>Poisson regression<br>Negative binomial regression<br>Logistic regression                                         |
| Friedman, B.W. et al.<br>2009<br>United States | People with severe headache        | $\geq 4$ visits per year                                                                 | To determine frequency of ED use and risk factors for use among patients suffering severe headache                                                                        | 13 451  | Markov chain Monte Carlo imputation<br>Logistic regression                                                                                                               |
| Frost, D.W. et al.<br>2017<br>Canada           | All                                | $\geq 3$ visits per year                                                                 | To determine whether machine learning techniques using text from a family practice electronic medical record can be used to predict future high ED                        | 43 111  | Logistic regression                                                                                                                                                      |

|    |                       |                                                   |                              |                                                                                                                                                                                                                                                 |         |                                                                                                                                                       |
|----|-----------------------|---------------------------------------------------|------------------------------|-------------------------------------------------------------------------------------------------------------------------------------------------------------------------------------------------------------------------------------------------|---------|-------------------------------------------------------------------------------------------------------------------------------------------------------|
|    |                       |                                                   |                              | use and total costs by patients who are not yet high ED users or high cost to the healthcare system                                                                                                                                             |         |                                                                                                                                                       |
|    |                       |                                                   |                              | To develop a predictive model of ED utilization for patients where a diagnosis of psychosis could be identified from a claim associated with a medical service provider visit                                                                   |         |                                                                                                                                                       |
| 8  | Girts, T.K. et al.    | People with a diagnosis of psychosis              | $\geq 2$ visits per 6 months |                                                                                                                                                                                                                                                 | 764     | t-test<br>Linear regression                                                                                                                           |
| 9  | 2002                  |                                                   |                              |                                                                                                                                                                                                                                                 |         |                                                                                                                                                       |
| 10 | United States         |                                                   |                              |                                                                                                                                                                                                                                                 |         |                                                                                                                                                       |
| 11 |                       |                                                   |                              |                                                                                                                                                                                                                                                 |         |                                                                                                                                                       |
| 12 |                       |                                                   |                              |                                                                                                                                                                                                                                                 |         |                                                                                                                                                       |
| 13 |                       |                                                   |                              |                                                                                                                                                                                                                                                 |         |                                                                                                                                                       |
| 14 |                       |                                                   |                              |                                                                                                                                                                                                                                                 |         | Chi-square test                                                                                                                                       |
| 15 |                       |                                                   |                              |                                                                                                                                                                                                                                                 |         | Logistic regression                                                                                                                                   |
| 16 |                       |                                                   |                              |                                                                                                                                                                                                                                                 |         | Regularized logistic regression                                                                                                                       |
| 17 | Grinspan, Z.M. et al. | People with epilepsy                              | $\geq 4$ visits per year     | To describe (1) the predictability of frequent ED use (a marker of inadequate disease control and/or poor access to care), and (2) the demographics, comorbidities, and use of health services of frequent ED users, among people with epilepsy | 8 041   | Elastic net logistic regression<br>Decision trees<br>Random forests<br>AdaBoost<br>Support vector machines<br>Receiver operating characteristic curve |
| 18 |                       |                                                   |                              |                                                                                                                                                                                                                                                 |         |                                                                                                                                                       |
| 19 | 2015                  |                                                   |                              |                                                                                                                                                                                                                                                 |         |                                                                                                                                                       |
| 20 | United States         |                                                   |                              |                                                                                                                                                                                                                                                 |         |                                                                                                                                                       |
| 21 |                       |                                                   |                              |                                                                                                                                                                                                                                                 |         |                                                                                                                                                       |
| 22 |                       |                                                   |                              |                                                                                                                                                                                                                                                 |         |                                                                                                                                                       |
| 23 |                       |                                                   |                              |                                                                                                                                                                                                                                                 |         |                                                                                                                                                       |
| 24 |                       |                                                   |                              |                                                                                                                                                                                                                                                 |         |                                                                                                                                                       |
| 25 |                       |                                                   |                              |                                                                                                                                                                                                                                                 |         |                                                                                                                                                       |
| 26 |                       |                                                   |                              |                                                                                                                                                                                                                                                 |         |                                                                                                                                                       |
| 27 | Hardie, T.L. et al.   | All                                               | $\geq 4$ visits per year     | To describe frequent users of ED services in a rural community setting and the association between counts of patient's visits and discrete diagnoses                                                                                            | 1 652   | Poisson regression                                                                                                                                    |
| 28 |                       |                                                   |                              |                                                                                                                                                                                                                                                 |         |                                                                                                                                                       |
| 29 | 2015                  |                                                   |                              |                                                                                                                                                                                                                                                 |         |                                                                                                                                                       |
| 30 | United States         |                                                   |                              |                                                                                                                                                                                                                                                 |         |                                                                                                                                                       |
| 31 |                       |                                                   |                              |                                                                                                                                                                                                                                                 |         |                                                                                                                                                       |
| 32 |                       |                                                   |                              |                                                                                                                                                                                                                                                 |         |                                                                                                                                                       |
| 33 | Hasegawa, K. et al.   | People with acute asthma                          | $\geq 2$ visits per year     | To examine the proportion and patient characteristics of adult patients with multiple ED visits for acute asthma and the associated hospital charges                                                                                            | 86 224  | Chi-square test<br>Kruskal-Wallis test<br>Logistic regression                                                                                         |
| 34 |                       |                                                   |                              |                                                                                                                                                                                                                                                 |         |                                                                                                                                                       |
| 35 | 2014                  |                                                   |                              |                                                                                                                                                                                                                                                 |         |                                                                                                                                                       |
| 36 | United States         |                                                   |                              |                                                                                                                                                                                                                                                 |         |                                                                                                                                                       |
| 37 |                       |                                                   |                              |                                                                                                                                                                                                                                                 |         |                                                                                                                                                       |
| 38 |                       |                                                   |                              |                                                                                                                                                                                                                                                 |         |                                                                                                                                                       |
| 39 | Hasegawa, K. et al.   | People with acute heart failure syndrome          | $\geq 2$ visits per year     | To examine the proportion and characteristics of patients with frequent ED visits for acute heart failure syndrome and associated healthcare utilization                                                                                        | 113 033 | Chi-square test<br>Kruskal-Wallis test<br>Negative binomial regression<br>Linear regression                                                           |
| 40 |                       |                                                   |                              |                                                                                                                                                                                                                                                 |         |                                                                                                                                                       |
| 41 | 2014                  |                                                   |                              |                                                                                                                                                                                                                                                 |         |                                                                                                                                                       |
| 42 | United States         |                                                   |                              |                                                                                                                                                                                                                                                 |         |                                                                                                                                                       |
| 43 |                       |                                                   |                              |                                                                                                                                                                                                                                                 |         |                                                                                                                                                       |
| 44 |                       |                                                   |                              |                                                                                                                                                                                                                                                 |         |                                                                                                                                                       |
| 45 |                       |                                                   |                              |                                                                                                                                                                                                                                                 |         |                                                                                                                                                       |
| 46 | Hasegawa, K. et al.   | People with chronic obstructive pulmonary disease | $\geq 2$ visits per year     | To quantify the proportion and characteristics of patients with frequent ED visits for acute exacerbation of chronic obstructive pulmonary disease and associated healthcare utilization                                                        | 98 280  | Chi-square test<br>Kruskal-Wallis test<br>Logistic regression<br>Negative binomial regression<br>Linear regression                                    |
| 47 |                       |                                                   |                              |                                                                                                                                                                                                                                                 |         |                                                                                                                                                       |
| 48 | 2014                  |                                                   |                              |                                                                                                                                                                                                                                                 |         |                                                                                                                                                       |
| 49 | United States         |                                                   |                              |                                                                                                                                                                                                                                                 |         |                                                                                                                                                       |
| 50 |                       |                                                   |                              |                                                                                                                                                                                                                                                 |         |                                                                                                                                                       |
| 51 |                       |                                                   |                              |                                                                                                                                                                                                                                                 |         |                                                                                                                                                       |
| 52 |                       |                                                   |                              |                                                                                                                                                                                                                                                 |         |                                                                                                                                                       |
| 53 | Huang, J.A. et al.    | All                                               | $\geq 4$ visits per year     | To characterize frequent ED users and to identify the factors associated with                                                                                                                                                                   | 800     | Chi-square test<br>Logistic regression                                                                                                                |
| 54 |                       |                                                   |                              |                                                                                                                                                                                                                                                 |         |                                                                                                                                                       |
| 55 | 2003                  |                                                   |                              |                                                                                                                                                                                                                                                 |         |                                                                                                                                                       |
| 56 | Taiwan                |                                                   |                              |                                                                                                                                                                                                                                                 |         |                                                                                                                                                       |
| 57 |                       |                                                   |                              |                                                                                                                                                                                                                                                 |         |                                                                                                                                                       |

|                         |                                     |                                         |                                                                                                                                                                                                                               |                                         |                                                                                                             |  |
|-------------------------|-------------------------------------|-----------------------------------------|-------------------------------------------------------------------------------------------------------------------------------------------------------------------------------------------------------------------------------|-----------------------------------------|-------------------------------------------------------------------------------------------------------------|--|
|                         |                                     |                                         |                                                                                                                                                                                                                               | frequent ED use in a hospital in Taiwan |                                                                                                             |  |
| Hudon, C. et al.        | All                                 | $\geq 3$ visits per year                | To identify prospectively personal characteristics and experience of organizational and relational dimensions of primary care that predict frequent use of ED                                                                 | 1 769                                   | Mixed effect logistic regression                                                                            |  |
| Hudon, C. et al.        | People with diabetes                | $\geq 3$ visits for 3 consecutive years | To explore the factors associated with chronic frequent ED utilization in a population with diabetes                                                                                                                          | 62 316                                  | Logistic regression<br>Decision trees                                                                       |  |
| Hunt, K.A. et al.       | All                                 | $\geq 4$ visits per year                | To identify frequent users of the ED and determine the characteristics of these patients                                                                                                                                      | 49 603                                  | Logistic regression                                                                                         |  |
| Huynh, C. et al.        | People with substance use disorders | $\geq 4$ visits per year                | To assess the characteristics of individuals with substance use disorders according to their frequency of ED utilization, and to examine which variables were associated with an increase in ED visits using Andersen's model | 4 526                                   | Chi-square test<br>Analysis of variance<br>Negative binomial regression<br>Generalized estimating equations |  |
| Kerr, T. et al.         | Injection drug users                | $\geq 3$ visits during the 2 past years | To examine rates of primary care and emergency room use among injection drug users and to identify correlates of frequent emergency department use                                                                            | 883                                     | Chi-square test<br>Wilcoxon rank sign test<br>t-test<br>Logistic regression                                 |  |
| Kirby, S.E. et al.      | People with chronic disease         | $\geq 3$ visits per year                | To explore the link between frequent readmissions in chronic disease and patient-related factors                                                                                                                              | 15 806                                  | Chi-square test<br>Logistic regression                                                                      |  |
| Kirby, S.E. et al.      | All                                 | $\geq 4$ visits per year                | To identify the factors associated with frequent re-attendances in a regional hospital thereby highlighting possible solutions to the problem                                                                                 | 15 806                                  | Kruskal-Wallis test<br>Chi-square test<br>Logistic regression                                               |  |
| Ko, M. et al.           | All                                 | $\geq 4$ visits per year                | To describe the distribution of the frequency of ED visits among ED users in 2010 and to evaluate the association of frequent ED use with various patient characteristics                                                     | 170 457                                 | Logistic regression                                                                                         |  |
| Ledoux, Y. & Minner, P. | Psychiatric                         | $\geq 4$ visits per year                | (1) To provide a naturalistic evaluation of                                                                                                                                                                                   | 2 470                                   | Mantel-Haenszel test<br>Analysis of variance                                                                |  |

|    |                      |             |                     |                              |         |                      |
|----|----------------------|-------------|---------------------|------------------------------|---------|----------------------|
| 1  |                      |             |                     |                              |         |                      |
| 2  |                      |             |                     |                              |         |                      |
| 3  |                      |             |                     |                              |         |                      |
| 4  | 2006                 |             |                     | patients repeating           |         | Logistic regression  |
| 5  | Belgium              |             |                     | admissions in a psychiatric  |         |                      |
| 6  |                      |             |                     | emergency ward               |         |                      |
| 7  |                      |             |                     | (distinguishing between      |         |                      |
| 8  |                      |             |                     | occasional repeaters and     |         |                      |
| 9  |                      |             |                     | frequent repeaters), (2) to  |         |                      |
| 10 |                      |             |                     | identify                     |         |                      |
| 11 |                      |             |                     | patients' characteristics    |         |                      |
| 12 |                      |             |                     | that predict repeated use of |         |                      |
| 13 |                      |             |                     | a psychiatric emergency      |         |                      |
| 14 |                      |             |                     | room and (3) to propose      |         |                      |
| 15 |                      |             |                     | adapted treatment models     |         |                      |
| 16 |                      |             |                     | To evaluate and              |         |                      |
| 17 | Legramante, J.M.     |             |                     | characterize hospital visits |         |                      |
| 18 | et al.               |             |                     | of older patients (age 65 or |         | t-test               |
| 19 |                      | All         | $\geq 4$ visits per | hospital in Rome, in order   | 38 016  | Logistic regression  |
| 20 | 2016                 |             | year                | to identify clinical and     |         |                      |
| 21 | Italy                |             |                     | social characteristics       |         |                      |
| 22 |                      |             |                     | potentially associated with  |         |                      |
| 23 |                      |             |                     | "elderly frequent users"     |         |                      |
| 24 |                      |             |                     | To describe the              |         |                      |
| 25 | Leporatti, L. et al. |             |                     | characteristics of patients  |         | Zero-truncated       |
| 26 |                      | All         | 90th percentile     | who frequently accessed      | 147 864 | negative binomial    |
| 27 | 2016                 |             | $\geq 3$ visits per | accident and emergency       |         | regression           |
| 28 | Italy                |             | year                | departments located in the   |         | Logistic regression  |
| 29 |                      |             |                     | metropolitan area of Genoa   |         |                      |
| 30 |                      |             |                     | To describe the              |         |                      |
| 31 | Lim. S.F. et al.     |             |                     | characteristics of frequent  |         | t-test               |
| 32 |                      | People with | $\geq 4$ visits per | attenders who present        | 155     | Chi-square test      |
| 33 | 2014                 | asthma      | year                | themselves multiple times    |         | Mann-Whitney U test  |
| 34 | Singapore            |             |                     | to the ED for asthma         |         | Logistic regression  |
| 35 |                      |             |                     | exacerbations                |         |                      |
| 36 |                      |             |                     | To identify predictive       |         |                      |
| 37 | Limsrivilai, J. et   |             |                     | factors readily available in |         |                      |
| 38 | al.                  | People with |                     | a standard electronic        |         |                      |
| 39 |                      | inflammator | 75th percentile     | medical record to develop    | 1 430   | Receiver operating   |
| 40 | 2017                 | y bowel     | of the annual       | a multivariate model to      |         | characteristic curve |
| 41 | United States        | diseases    | medical charges     | predict the probability of   |         | Logistic regression  |
| 42 |                      |             |                     | inflammatory bowel           |         |                      |
| 43 |                      |             |                     | diseases-related             |         |                      |
| 44 |                      |             |                     | hospitalization, ED visit,   |         |                      |
| 45 |                      |             |                     | and high total charges in    |         |                      |
| 46 |                      |             |                     | the subsequent year          |         |                      |
| 47 |                      |             |                     | To examine factors           |         |                      |
| 48 | Lin, W.C. et al.     |             |                     | associated with frequent     |         | Chi-square test      |
| 49 |                      | Homeless    | $\geq 3$ visits per | hospitalizations and ED      | 6 494   | Analysis of variance |
| 50 | 2015                 |             | year                | visits among Medicaid        |         | Negative binomial    |
| 51 | United States        |             |                     | members who were             |         | regression           |
| 52 |                      |             |                     | homeless                     |         |                      |
| 53 |                      |             |                     | To determine whether         |         |                      |
| 54 | Liu, S.W. et al.     | People with | $\geq 4$ visits per | frequent ED users are        |         | t-test               |
| 55 |                      | mental      | year                | more likely to make at       | 65 201  | Chi-square test      |
| 56 | 2013                 | health,     |                     | least one and a majority of  |         | Logistic regression  |
| 57 | United States        | alcohol or  |                     | visits for mental health,    |         |                      |
| 58 |                      |             |                     |                              |         |                      |

|                                                  |                                             |                                             |  |                                                                                                                                                                                 |        |                                                              |
|--------------------------------------------------|---------------------------------------------|---------------------------------------------|--|---------------------------------------------------------------------------------------------------------------------------------------------------------------------------------|--------|--------------------------------------------------------------|
|                                                  | drug-related diagnoses                      |                                             |  | alcohol, or drug-related complaints compared to non-frequent users                                                                                                              |        |                                                              |
| Mandelberg, J.H. et al.<br>2000<br>United States | All                                         | $\geq 5$ visits per year                    |  | To determine how the demographic, clinical, and utilization characteristics of frequent ED users differ from those of other ED patients                                         | 43 383 | Logistic regression<br>Survival analysis                     |
| Mann, E.G. et al.<br>2016<br>Canada              | People with chronic pain                    | 90th percentile                             |  | To investigate the role of chronic pain in healthcare visits and to document the frequency of healthcare visits and to identify characteristics associated with frequent visits | 1 274  | Logistic regression                                          |
| McMahon, C.G. et al.<br>2016<br>Ireland          | All                                         | $\geq 4$ visits per year                    |  | To examine the characteristics of the frequent ED attenders by age (under 65 and over 65 years)                                                                                 | 19 310 | Chi-square test<br>Logistic regression                       |
| Meyer, J.P. et al.<br>2013<br>United States      | Prisoners with Human Immunodeficiency Virus | $\geq 2$ visits per year                    |  | To characterize the medical, social, and psychiatric correlates of frequent ED use among released prisoners with human immunodeficiency virus                                   | 151    | t-test<br>Chi-square test<br>Poisson regression              |
| Milani, S.A. et al.<br>2016<br>United States     | People with multimorbid chronic diseases    | $\geq 4$ visits per year                    |  | To examine the association between multimorbid chronic disease and frequency ED visits in the past 6 months, by sex, in a community sample of adults from northern Florida      | 7 143  | Breslow-Day test<br>Logistic regression                      |
| Milbrett, P. & Halm, M.<br>2009<br>United States | All                                         | $\geq 6$ visits per year                    |  | To describe the characteristics of patients who frequently use ED services and to determine factors most predictive of frequent ED use                                          | 201    | Chi-square test<br>Mann-Whitney U test<br>Poisson regression |
| Moe, J. et al.<br>2013<br>Canada                 | All                                         | 95th percentile                             |  | To develop uniform definitions, quantify ED burden, and characterize adult frequent users of a suburban community ED                                                            | 14 223 | Chi-square test<br>Mann-Whitney U test                       |
| Mueller, E.L. et al.<br>2016<br>United States    | Children with cancer                        | 90th percentile<br>$\geq 4$ visits per year |  | To (a) evaluate patient and ED encounter characteristics of frequent ED utilizers among children with cancer and (b) quantify healthcare services for frequent ED utilizers     | 17 943 | Chi-square test<br>Logistic regression                       |



|    |                         |                                                                       |                          |                                                                                                                                                                                                                             |           |                                                                                                            |
|----|-------------------------|-----------------------------------------------------------------------|--------------------------|-----------------------------------------------------------------------------------------------------------------------------------------------------------------------------------------------------------------------------|-----------|------------------------------------------------------------------------------------------------------------|
| 1  |                         |                                                                       |                          |                                                                                                                                                                                                                             |           |                                                                                                            |
| 2  |                         |                                                                       |                          |                                                                                                                                                                                                                             |           |                                                                                                            |
| 3  |                         |                                                                       |                          |                                                                                                                                                                                                                             |           |                                                                                                            |
| 4  | Nambiar, D. et al.      | Injection drug users                                                  | $\geq 3$ visits per year | To describe demographic factors, patterns of substance use and previous health service use associated with frequent use of EDs in people who inject drugs                                                                   | 612       | Negative binomial regression<br>Logistic regression                                                        |
| 5  | 2017                    |                                                                       |                          |                                                                                                                                                                                                                             |           |                                                                                                            |
| 6  | Australia               |                                                                       |                          |                                                                                                                                                                                                                             |           |                                                                                                            |
| 7  |                         |                                                                       |                          |                                                                                                                                                                                                                             |           |                                                                                                            |
| 8  |                         |                                                                       |                          |                                                                                                                                                                                                                             |           |                                                                                                            |
| 9  |                         |                                                                       |                          |                                                                                                                                                                                                                             |           |                                                                                                            |
| 10 |                         |                                                                       |                          |                                                                                                                                                                                                                             |           |                                                                                                            |
| 11 | Neufeld, E. et al.      | All                                                                   | $\geq 4$ visits per year | To describe factors predicting frequent ED use among rural older adults receiving home care services in Ontario, Canada                                                                                                     | 12 118    | Chi-square test<br>Logistic regression                                                                     |
| 12 | 2016                    |                                                                       |                          |                                                                                                                                                                                                                             |           |                                                                                                            |
| 13 | Canada                  |                                                                       |                          |                                                                                                                                                                                                                             |           |                                                                                                            |
| 14 |                         |                                                                       |                          |                                                                                                                                                                                                                             |           |                                                                                                            |
| 15 |                         |                                                                       |                          |                                                                                                                                                                                                                             |           |                                                                                                            |
| 16 | Neuman, M.I. et al.     | All                                                                   | $\geq 4$ visits per year | To compare the characteristics and ED health services of children by their ED visit frequency                                                                                                                               | 1 896 547 | Mantel-Haenszel test<br>Receiver operating characteristic curve<br>Generalized linear mixed-effects models |
| 17 | 2014                    |                                                                       |                          |                                                                                                                                                                                                                             |           |                                                                                                            |
| 18 | United States           |                                                                       |                          |                                                                                                                                                                                                                             |           |                                                                                                            |
| 19 |                         |                                                                       |                          |                                                                                                                                                                                                                             |           |                                                                                                            |
| 20 |                         |                                                                       |                          |                                                                                                                                                                                                                             |           |                                                                                                            |
| 21 | Ngamini-Ngui, A. et al. | Patients with schizophrenia and a co-occurring substance use disorder | $\geq 5$ visits per year | To assess factors associated over time with high use of EDs by Quebec patients who had schizophrenia and a co-occurring substance use disorder                                                                              | 2 921     | Generalized estimating equations                                                                           |
| 22 | 2014                    |                                                                       |                          |                                                                                                                                                                                                                             |           |                                                                                                            |
| 23 | Canada                  |                                                                       |                          |                                                                                                                                                                                                                             |           |                                                                                                            |
| 24 |                         |                                                                       |                          |                                                                                                                                                                                                                             |           |                                                                                                            |
| 25 |                         |                                                                       |                          |                                                                                                                                                                                                                             |           |                                                                                                            |
| 26 |                         |                                                                       |                          |                                                                                                                                                                                                                             |           |                                                                                                            |
| 27 |                         |                                                                       |                          |                                                                                                                                                                                                                             |           |                                                                                                            |
| 28 |                         |                                                                       |                          |                                                                                                                                                                                                                             |           |                                                                                                            |
| 29 |                         |                                                                       |                          |                                                                                                                                                                                                                             |           |                                                                                                            |
| 30 | Norman, C. et al.       | All                                                                   | $\geq 4$ visits per year | To clearly define and describe characteristics of frequent emergency medical services users in order to provide suggestions for efficient and cost-effective interventions that address the healthcare needs of these users | 539       | Logistic regression                                                                                        |
| 31 | 2016                    |                                                                       |                          |                                                                                                                                                                                                                             |           |                                                                                                            |
| 32 | United States           |                                                                       |                          |                                                                                                                                                                                                                             |           |                                                                                                            |
| 33 |                         |                                                                       |                          |                                                                                                                                                                                                                             |           |                                                                                                            |
| 34 |                         |                                                                       |                          |                                                                                                                                                                                                                             |           |                                                                                                            |
| 35 |                         |                                                                       |                          |                                                                                                                                                                                                                             |           |                                                                                                            |
| 36 |                         |                                                                       |                          |                                                                                                                                                                                                                             |           |                                                                                                            |
| 37 |                         |                                                                       |                          |                                                                                                                                                                                                                             |           |                                                                                                            |
| 38 | O'Toole, T.P. et al.    | Substance users                                                       | $\geq 3$ visits per year | To identify factors associated with 12-month high frequency utilization of ambulatory care, ED, and inpatient medical care in a substance-using population                                                                  | 326       | t-test<br>Chi-square test<br>Logistic regression                                                           |
| 39 | 2007                    |                                                                       |                          |                                                                                                                                                                                                                             |           |                                                                                                            |
| 40 | United States           |                                                                       |                          |                                                                                                                                                                                                                             |           |                                                                                                            |
| 41 |                         |                                                                       |                          |                                                                                                                                                                                                                             |           |                                                                                                            |
| 42 |                         |                                                                       |                          |                                                                                                                                                                                                                             |           |                                                                                                            |
| 43 |                         |                                                                       |                          |                                                                                                                                                                                                                             |           |                                                                                                            |
| 44 | Palmer, E. et al.       | All                                                                   | $\geq 4$ visits per year | To determine if having a primary care provider is an important factor in frequency of ED use                                                                                                                                | 59 803    | Chi-square test<br>Wilcoxon rank-sum test<br>Logistic regression                                           |
| 45 | 2014                    |                                                                       |                          |                                                                                                                                                                                                                             |           |                                                                                                            |
| 46 | Canada                  |                                                                       |                          |                                                                                                                                                                                                                             |           |                                                                                                            |
| 47 |                         |                                                                       |                          |                                                                                                                                                                                                                             |           |                                                                                                            |
| 48 |                         |                                                                       |                          |                                                                                                                                                                                                                             |           |                                                                                                            |
| 49 | Panopalis, P. et al.    | People with systemic lupus erythematosus                              | $\geq 3$ visits per year | To describe characteristics of systemic lupus erythematosus patients who are frequent users of the ED and to identify predictors of frequent ED use                                                                         | 807       | One-way analysis of variance<br>Logistic regression                                                        |
| 50 | 2010                    |                                                                       |                          |                                                                                                                                                                                                                             |           |                                                                                                            |
| 51 | United States           |                                                                       |                          |                                                                                                                                                                                                                             |           |                                                                                                            |
| 52 |                         |                                                                       |                          |                                                                                                                                                                                                                             |           |                                                                                                            |
| 53 |                         |                                                                       |                          |                                                                                                                                                                                                                             |           |                                                                                                            |
| 54 |                         |                                                                       |                          |                                                                                                                                                                                                                             |           |                                                                                                            |
| 55 |                         |                                                                       |                          |                                                                                                                                                                                                                             |           |                                                                                                            |
| 56 |                         |                                                                       |                          |                                                                                                                                                                                                                             |           |                                                                                                            |
| 57 |                         |                                                                       |                          |                                                                                                                                                                                                                             |           |                                                                                                            |
| 58 |                         |                                                                       |                          |                                                                                                                                                                                                                             |           |                                                                                                            |
| 59 |                         |                                                                       |                          |                                                                                                                                                                                                                             |           |                                                                                                            |
| 60 |                         |                                                                       |                          |                                                                                                                                                                                                                             |           |                                                                                                            |

|                                                    |                                                     |                                          |                                                                                                  |                                                                                                                                                                                                                                   |                           |                                                                                                            |
|----------------------------------------------------|-----------------------------------------------------|------------------------------------------|--------------------------------------------------------------------------------------------------|-----------------------------------------------------------------------------------------------------------------------------------------------------------------------------------------------------------------------------------|---------------------------|------------------------------------------------------------------------------------------------------------|
| 1<br>2<br>3<br>4<br>5<br>6<br>7<br>8<br>9          | Pasic, J. et al.<br>2005<br>United States           | Psychiatric                              | 2 SD above the mean number of visits<br>$\geq 6$ visits per year<br>$\geq 4$ visits in a quarter | To examine the sociodemographic and clinical characteristics of high utilizers of psychiatric emergency services                                                                                                                  | 17 481                    | Chi-square test<br>Logistic regression                                                                     |
| 10<br>11<br>12<br>13<br>14                         | Paul, P. et al.<br>2010<br>Singapore                | All                                      | $\geq 5$ visits per year                                                                         | To determine factors associated with frequent ED attendance at an acute general hospital in Singapore.                                                                                                                            | 82 172                    | Chi-square test<br>Logistic regression                                                                     |
| 15<br>16<br>17<br>18<br>19<br>20<br>21             | Pereira, M. et al.<br>2016<br>United States         | All                                      | $\geq 5$ visits per year                                                                         | To develop machine learning models that can predict future ED utilization of individual patients, using only information from the present and the past                                                                            | 4 604 252                 | Decision trees<br>AdaBoost<br>Logistic regression                                                          |
| 22<br>23<br>24<br>25<br>26<br>27                   | Pines, J.M. & Buford, K.<br>2006<br>United States   | People with asthma                       | 90th percentile<br>$\geq 3$ visits per year                                                      | To determine socioeconomic and demographic factors that predict frequent ED use among asthmatics in southeastern Pennsylvania                                                                                                     | 1 799                     | t-test<br>Chi-square test<br>Logistic regression                                                           |
| 28<br>29<br>30<br>31<br>32<br>33<br>34             | Quilty, S. et al.<br>2016<br>Australia              | People without chronic health conditions | $\geq 6$ visits per year                                                                         | To determine the clinical and environmental variables associated with frequent presentations by adult patients to a remote Australian hospital ED for reasons other than chronic health conditions                                | 273                       | t-test<br>Chi-square test<br>Logistic regression                                                           |
| 35<br>36<br>37<br>38<br>39<br>40<br>41<br>42<br>43 | Rask, K.J. et al.<br>1998<br>United States          | All                                      | $\geq 10$ visits per 2 years                                                                     | To describe primary care clinic use and emergency ED use for a cohort of public hospital patients seen in the ED, identify predictors of frequent ED use, and ascertain the clinical diagnoses of those with high rates of ED use | 351                       | Chi-square test<br>t-test<br>Logistic regression                                                           |
| 44<br>45<br>46<br>47<br>48<br>49                   | Samuels-Kalow, M.E. et al.<br>2017<br>United States | All                                      | $\geq 4$ visits per year                                                                         | To derive and test a predictive model for high frequency (4 or more visits per year), low-acuity (emergency severity index 4 or 5) utilization of the pediatric ED                                                                | 60 799 (number of visits) | Likelihood ratio test<br>Chi-square test<br>Receiver operating characteristic curve<br>Logistic regression |
| 50<br>51<br>52<br>53<br>54<br>55<br>56             | Schmoll, S. et al.<br>2015<br>France                | Psychiatric                              | $\geq 9$ visits during the 6 past years                                                          | To describe demographic and clinical characteristics of frequent visitors to a psychiatric emergency ward in a French Academic hospital over 6                                                                                    | 8 800                     | t-test<br>Chi-square test<br>Logistic regression                                                           |

|                        |                                                   |                          |                                                                                                                                                                                                                                                                                     |                                              |                                                                                                      |  |
|------------------------|---------------------------------------------------|--------------------------|-------------------------------------------------------------------------------------------------------------------------------------------------------------------------------------------------------------------------------------------------------------------------------------|----------------------------------------------|------------------------------------------------------------------------------------------------------|--|
|                        |                                                   |                          |                                                                                                                                                                                                                                                                                     | years in comparison to non-frequent visitors |                                                                                                      |  |
| Soler, J.J. et al.     | People with chronic obstructive pulmonary disease | $\geq 3$ visits per year | To identify factors associated with frequent use of hospital services (emergency care and admissions) in patients with chronic obstructive pulmonary disease                                                                                                                        | 64                                           | t-test<br>Chi-square test<br>Kolmogorov-Smirnov test<br>Mann-Whitney U test<br>Logistic regression   |  |
| Sun, B.C. et al.       | All                                               | $\geq 4$ visits per year | To identify predictors and outcomes associated with frequent ED users                                                                                                                                                                                                               | 2 333                                        | Likelihood ratio test<br>Chi-square test<br>Hosmer-Lemeshow test<br>Logistic regression<br>Bootstrap |  |
| Tangherlini, N. et al. | All                                               | $\geq 4$ visits per year | To identify the factors that lead to increased use of emergency medical services (EMS) by patients $\geq 65$ years of age in an urban EMS system                                                                                                                                    | 10 918                                       | Kruskal-Wallis test<br>Chi-square test<br>Logistic regression                                        |  |
| Thakarar, K. et al.    | Homeless                                          | $\geq 2$ visits per year | To identify risk factors for frequent emergency room (ER) visits and to examine the effects of housing status and HIV serostatus on ER utilization                                                                                                                                  | 412                                          | Chi-square test<br>Logistic regression                                                               |  |
| Vandyk, A.D. et al.    | Mental health                                     | $\geq 5$ visits per year | To explore the population profile and associated socio demographic, clinical, and service use factors of individuals who make frequent visits (5+annually) to hospital EDs for mental health complaints                                                                             | 536                                          | Hosmer-Lemeshow test<br>Logistic regression                                                          |  |
| Vinton, V.T. et al.    | Chronic diseases and mental health                | $\geq 4$ visits per year | To compare the characteristics of US adults by frequency of ED utilization, specifically the prevalence of chronic diseases and outpatient primary care and mental health utilization                                                                                               | 157 818                                      | Logistic regression                                                                                  |  |
| Vu, F. et al.          | Mental health and substance users                 | $\geq 4$ visits per year | To determine the proportions of psychiatric and substance use disorders suffered by EDs' frequent users compared to the mainstream ED population, to evaluate how effectively these disorders were diagnosed in both groups of patients by ED physicians, and to determine if these | 389                                          | Fisher exact test<br>Chi-square test<br>Logistic regression                                          |  |

|                       |                    |                                          |                                                                                                                                                                                                                                   |                                                            |                                                                                                                               |  |
|-----------------------|--------------------|------------------------------------------|-----------------------------------------------------------------------------------------------------------------------------------------------------------------------------------------------------------------------------------|------------------------------------------------------------|-------------------------------------------------------------------------------------------------------------------------------|--|
|                       |                    |                                          |                                                                                                                                                                                                                                   | disorders were predictive of a frequent use of ED services |                                                                                                                               |  |
| Wajnberg, A. et al.   | All                | $\geq 4$ visits over 6 months            | To determine factors associated with frequent ED utilization by older adults                                                                                                                                                      | 5 718                                                      | Chi-square test<br>t-test                                                                                                     |  |
| 2012<br>United States |                    |                                          |                                                                                                                                                                                                                                   |                                                            |                                                                                                                               |  |
| Watase, H. et al.     | Adults with asthma | $\geq 2$ visits per year                 | To characterise the adult patients who frequently presented to the ED for asthma exacerbation in Japan                                                                                                                            | 1 002                                                      | One-way analysis of variance<br>Chi-square test<br>Kruskal-Wallis test<br>Logistic regression<br>Negative binomial regression |  |
| 2015<br>Japan         |                    |                                          |                                                                                                                                                                                                                                   |                                                            |                                                                                                                               |  |
| Woo, J.H. et al.      | All                | $\geq 4$ visits per year                 | To understand whether the findings about frequent ED users in prior studies in the US healthcare system would be replicated in the Korean population, and whether these findings are independent of insurance status or ethnicity | 156 246                                                    | t-test<br>Chi-square test<br>Linear regression<br>Logistic regression                                                         |  |
| 2016<br>Korea         |                    |                                          |                                                                                                                                                                                                                                   |                                                            |                                                                                                                               |  |
| Wu, J. et al.         | All                | $\geq 16$ visits during the 2 past years | To assess the feasibility of using routinely gathered registration data to predict patients who will visit EDs with high frequency                                                                                                | 1 272 367                                                  | Logistic regression<br>Receiver operating characteristic curve                                                                |  |
| 2016<br>United States |                    |                                          |                                                                                                                                                                                                                                   |                                                            |                                                                                                                               |  |

114

115 **Fig 2. Number of studies by country.**116 **Regression**

117 Regression tools consist of a set of processes aimed at quantifying the relationships  
 118 between a dependent variable and other explanatory variables [14]. They are useful for  
 119 description and prediction. Some regression models may be *regularized*, which in this case  
 120 means avoiding overfitting with too many explanatory variables, or *zero-truncated*, which  
 121 means that the model is not allowed to take null values.

122 Out of the four categories (regression, hypothesis testing, machine learning, and other  
 123 tools), the most reported tool was the logistic regression (70 studies [3-5, 15-81], two of  
 124 which are regularized by LASSO or elastic net techniques), followed by the binomial

1  
2  
3 125 regression (11 studies [18, 46, 55, 73, 76, 77, 82-86], 2 of which are zero-truncated). To a  
4  
5 126 lesser extent, the linear regression (five studies [74, 76, 83, 87, 88]), the analysis of variance  
6  
7 127 (five studies [44, 59, 73, 84, 85]), the Poisson regression (five studies [77, 89-92], one of  
8  
9 128 which is zero-truncated), and the Cox regression (one study [86]) were also used. In those  
10  
11 129 studies, the results are often associated with odds-ratio. The mixed-effects models were  
12  
13 130 mentioned twice [39, 93]. Regression parameters were estimated by generalized estimating  
14  
15 131 equations in three studies [18, 84, 94] while parameter confidence intervals were estimated  
16  
17 132 by the bootstrap procedure (two studies [25, 67]) and the Clopper-Pearson method (one  
18  
19 133 study [25]). The receiver operating characteristic curve (ROC), or equivalently the  
20  
21 134 sensitivity, specificity, or area under the curve (“c-statistic”), was computed in  
22  
23 135 seven studies [4, 36, 48, 63, 75, 89, 93]. Finally, one study performed Markov chain Monte  
24  
25 136 Carlo imputation to account for missing data [78].  
26  
27  
28  
29  
30

### 31 **Hypothesis testing**

32  
33  
34 138 Statistical tests aim at testing a specific hypothesis about data and rely on probability  
35  
36 139 distributions [95]. In the selected studies, the tests aimed mainly at comparing two samples  
37  
38 140 (frequent users and non-frequent users).  
39  
40  
41

42 141 The most common statistical tests were the chi-square test (40 studies [17, 28, 31, 34, 36-  
43  
44 142 38, 40-42, 47, 49, 52, 54, 56, 58, 60, 62-69, 72-74, 76, 77, 79-81, 83-85, 91, 92, 96, 97])  
45  
46 143 and the t-test (15 studies [40, 45, 47, 49, 62, 63, 65, 66, 74, 77, 79, 81, 88, 91, 97]), which  
47  
48 144 measured associations between variables and goodness-of-fit. As an alternative to the  
49  
50 145 chi-square test for association, one study used the Fisher exact test [72]. Sample mean  
51  
52 146 differences were assessed by 17 studies with the Mann-Whitney U test (also called the  
53  
54 147 Wilcoxon rank-sum test [20, 23, 31, 47, 58, 66, 77, 92, 96]), its variant for dependent  
55  
56  
57  
58  
59

1  
2  
3 148 samples the Wilcoxon signed rank test [40], or the Kruskal-Wallis test [23, 37, 42, 68, 73,  
4  
5 149 76, 83]. The Mantel-Haenszel test (test for differences in contingency tables, two studies  
6  
7 150 [44, 93]), the likelihood ratio test (significance test for nested models, two studies [64, 67]),  
8  
9 151 the Hosmer-Lemeshow test (goodness-of-fit for logistic regression, two studies [67, 70]),  
10  
11 152 and the Breslow-Day test (test for homogeneity in contingency tables odds ratio [53]) were  
12  
13 153 also used to a lesser degree. Finally, one study checked the assumption of normality with  
14  
15 154 the Kolmogorov-Smirnov test [66].  
16  
17  
18  
19

## 20 155 **Machine learning**

21  
22  
23 156 Machine learning tools are a set of algorithms that can learn and adapt to data in order to  
24  
25 157 classify or predict, for instance [98]. In the selected studies, the machine learning tools  
26  
27 158 aimed mainly at classifying users (frequent versus non-frequent).  
28  
29

30  
31 159 Two studies used random forests [31, 36] along with support vector machines. Decision  
32  
33 160 trees, which include classification and regression trees, were implemented by five studies  
34  
35 161 [5, 31, 36, 61, 87]. Adaptive boosting, or AdaBoost, is a meta-algorithm that combines  
36  
37 162 with other algorithms and helps for better performances. It was computed in two studies  
38  
39 163 [36, 61].  
40  
41  
42

## 43 164 **Other tools**

44  
45  
46 165 One study fitted a nonparametric distribution to their data [25], while another one used  
47  
48 166 survival analysis [50].  
49  
50  
51  
52  
53  
54  
55  
56  
57  
58  
59  
60

## 167 **4. Discussion**

168 The most exploited statistical tools arguably came from regression analysis. This may be  
169 because regression is well established in medical statistics or also because it is the most  
170 natural tool when trying to find significant variables to explain a dependent variable (in  
171 this case, to be a frequent user). Moreover, it allows predicting easily the risk of a new user  
172 becoming a frequent user, depending on its covariates. Other tools from hypothesis testing  
173 or machine learning also proved to be popular, albeit to a much lesser extent. Combining  
174 these statistical techniques may help in discovering significant patterns compared to using  
175 tools from one class only. In our scoping review, only two studies mixed statistical tools  
176 from regression, hypothesis testing, and machine learning [31, 36].

177 The analysis of frequent ED users could benefit from using more machine learning  
178 techniques. Those were found to be not as common as regression or hypothesis testing,  
179 although they are especially appropriate when dealing with classification, prediction, or  
180 big data. Tools such as support vector machines (which were used by two studies in this  
181 scoping review [31, 36]), artificial neural networks, or Bayesian networks are common  
182 classifiers and predictors in the artificial intelligence community [99]. They are popular for  
183 instance in cancer diagnostic and prognosis, which strongly rely on classification and  
184 prediction [100-102]. In particular, support vector machines, decision trees or  
185 self-organizing maps can deal with binary outcomes, which is usually the case for frequent  
186 use outcomes. They require large datasets, but this is becoming less and less of an issue in  
187 the medical field [103]. Nevertheless, machine learning tools often use a black box  
188 approach. This means that intermediary steps leading to the final solution can be difficult

189 to interpret, although in the end they display good performances in classifying and  
190 predicting. Those methods would thus turn out to be less useful in data exploration [104].

191 Other tools exist that may also be suitable for describing the associated variables or the  
192 prediction of frequent ED users but were not reported in the literature. Among those,  
193 principal component analysis (PCA) is a dimensional reduction and visualization  
194 technique, sometimes used with cluster or discriminant analysis [105]. Based on all the  
195 original explanatory variables, PCA constructs new ones by summing and weighing them  
196 differently. More weight is given to relevant variables so that those latter become dominant  
197 in the new constructions while still including all variables. For instance,  
198 Burgel *et al.* (2010) built chronic obstructive pulmonary disease clinical phenotypes by  
199 constructing new relevant variables with PCA and by grouping similar subjects in this new  
200 space with cluster analysis [106]. Moreover, PCA has already been used for the  
201 construction of questionnaires and diagnosis tools in a medical context [107, 108], both of  
202 which can prove useful in the identification of frequent users.

203 As mentioned, regression techniques were common in the selected studies. Yet, quantile  
204 regression (QR, [109]) was not mentioned. QR is a generalization of mean regression in  
205 the sense that its focus is not only the mean of the dependent variable distribution (such as  
206 in classical linear regression) but any quantile of it. QR thus represents an alternative to  
207 define frequent users by the high quantiles of ED visit distribution (e.g. the 90th quantile).  
208 Eight studies [25, 27, 46, 48, 51, 54, 62, 96] defined frequent users with quantiles, but they  
209 did not use QR. QR would allow for finer investigations in the different quantiles of ED  
210 users in relationship to the explanatory variables. For instance, the association between age  
211 and the number of ED visits may be significantly different across the 10th (low users) and



1  
2  
3 212 90th (frequent users) quantiles. Such a heterogeneous association would be uncovered by  
4  
5 213 QR, while usually unseen with a classical mean regression. Ding *et al.* (2010) used QR to  
6  
7 214 characterize waiting room and treatment times in EDs [110]. They explored the lowest,  
8  
9 215 median and highest of those times and highlighted predictors that were significant only in  
10  
11 216 particular quantiles. Usually, QR requires a continuous dependent variable as opposed to a  
12  
13 217 logistic regression, though it is possible to combine these two regressions [111].  
14  
15 218 Furthermore, defining frequent users by quantiles would allow for better comparison  
16  
17 219 between studies.  
18  
19  
20  
21

## 22 **Strengths and limitations**

23  
24  
25 221 To the best of our knowledge, this scoping review is the first to list statistical tools that are  
26  
27 222 used in the identification of variables associated with frequent ED use and the prediction  
28  
29 223 of frequent users. Besides, it was conducted following a well-defined methodological  
30  
31 224 framework. The search strategies were designed with an information specialist in three  
32  
33 225 different databases. Two independent evaluators selected the articles and extracted the data  
34  
35 226 while a third independent evaluator settled disagreements, ensuring that all included studies  
36  
37 227 were relevant. One limitation of our study is that quality assessment is not performed in a  
38  
39 228 scoping review. However, this should not alter the results, since the aim was to list which  
40  
41 229 statistical tools have been applied in the literature. Moreover, the majority of articles were  
42  
43 230 in English, which may introduce a selection bias (for instance, one excluded article was in  
44  
45 231 Spanish). More than half of the reviewed studies were indeed conducted in the USA,  
46  
47 232 making the results difficult to compare to other countries.  
48  
49  
50  
51  
52  
53  
54  
55  
56  
57  
58  
59  
60

## 233 **5. Conclusions**

234 Frequent ED users represent a complex issue, and their analysis require adequate statistical  
235 tools. In this context, this scoping review shows that some tools are well established, such  
236 as logistic regression and chi-square test, while others such as support vector machines are  
237 less so, though they would deserve to get more attention. It also outlines some research  
238 opportunities with other tools not yet explored.

## 239 **Acknowledgments**

240 We would like to thank information specialist Josée Toulouse for her help in defining the  
241 search strategies and Tina Wey (PhD) for revising the text.

## 242 **Authors contributions**

243 YC and CH designed the study with FRH and AV. YC, CH, and MB collected and analysed  
244 the data. In case of disagreement, FRH acted as third reviewer. YC and CH wrote the first  
245 draft of the manuscript. FRH, AV, MCC, and MB contributed to the writing of the  
246 manuscript. All authors read and approved the final manuscript.

## 247 **Funding**

248 This work was financed by grants from the *Fonds de recherche du Québec – Santé* and the  
249 *Centre de recherche du Centre hospitalier universitaire de Sherbrooke*. The funders had  
250 no role in study design, data collection and analysis, decision to publish, or preparation of  
251 the manuscript.

## 252 **Competing interests**

253 The authors declare that they have no competing interests.

## 254 **Data sharing statement**

255 No additional data are available.

## 256 **References**

- 257 1. Kumar GS, Klein R. Effectiveness of case management strategies in reducing  
258 emergency department visits in frequent user patient populations: a systematic review. *J*  
259 *Emerg Med.* 2013;44(3):717-29. Epub 2012/12/04. doi: 10.1016/j.jemermed.2012.08.035.  
260 PubMed PMID: 23200765.
- 261 2. LaCalle E, Rabin E. Frequent users of emergency departments: the myths, the data,  
262 and the policy implications. *Ann Emerg Med.* 2010;56(1):42-8. Epub 2010/03/30. doi:  
263 10.1016/j.annemergmed.2010.01.032. PubMed PMID: 20346540.
- 264 3. Hunt KA, Weber EJ, Showstack JA, Colby DC, Callaham ML. Characteristics of  
265 Frequent Users of Emergency Departments. *ANN EMERG MED.* 2006;48(1):1-8. doi:  
266 10.1016/j.annemergmed.2005.12.030.
- 267 4. Doupe MB, Palatnick W, Day S, Chateau D, Soodeen RA, Burchill C, et al.  
268 Frequent users of emergency departments: Developing standard definitions and defining  
269 prominent risk factors. *ANN EMERG MED.* 2012;60(1):24-32. doi:  
270 10.1016/j.annemergmed.2011.11.036.
- 271 5. Hudon C, Courteau J, Krieg C, Vanasse A. Factors associated with chronic frequent  
272 emergency department utilization in a population with diabetes living in metropolitan  
273 areas: A population-based retrospective cohort study. *BMC Health Serv Res.* 2017;17(1).  
274 doi: 10.1186/s12913-017-2453-3.
- 275 6. Krieg C, Hudon C, Chouinard MC, Dufour I. Individual predictors of frequent  
276 emergency department use: A scoping review. *BMC Health Serv Res.* 2016;16(1). doi:  
277 10.1186/s12913-016-1852-1.
- 278 7. Ruger JP, Richter CJ, Spitznagel EL, Lewis LM. Analysis of costs, length of stay,  
279 and utilization of emergency department services by frequent users: implications for health  
280 policy. *Acad Emerg Med.* 2004;11(12):1311-7. Epub 2004/12/04. doi:  
281 10.1197/j.aem.2004.07.008. PubMed PMID: 15576522.
- 282 8. Bodenheimer T, Berry-Millett R. Care management of patients with complex health  
283 care needs. *Policy.* 2009;1:6.
- 284 9. Arksey H, O'Malley L. Scoping studies: towards a methodological framework.  
285 *International journal of social research methodology.* 2005;8(1):19-32.
- 286 10. Levac D, Colquhoun H, O'Brien KK. Scoping studies: advancing the methodology.  
287 *Implement Sci.* 2010;5(1):69. Epub 2010/09/22. doi: 10.1186/1748-5908-5-69. PubMed  
288 PMID: 20854677; PubMed Central PMCID: PMC2954944.

- 1  
2  
3 289 11. Mays N, Roberts E, Popay J. Synthesising research evidence. Studying the  
4 290 organisation and delivery of health services: Research methods. 2001:188-220.  
5 291 12. Everitt BS, Skrondal A. The Cambridge Dictionary of Statistics. 4th ed. Cambridge:  
6 292 Cambridge University Press Cambridge; 2010.  
7 293 13. Vaismoradi M, Turunen H, Bondas T. Content analysis and thematic analysis:  
8 294 Implications for conducting a qualitative descriptive study. *Nurs Health Sci.*  
9 295 2013;15(3):398-405. Epub 2013/03/14. doi: 10.1111/nhs.12048. PubMed PMID:  
10 296 23480423.  
11 297 14. Harrell FE, Jr. Regression modeling strategies: with applications to linear models,  
12 298 logistic and ordinal regression, and survival analysis. 2 ed. New York: Springer  
13 299 International Publishing; 2015.  
14 300 15. Aagaard J, Aagaard A, Buus N. Predictors of frequent visits to a psychiatric  
15 301 emergency room: a large-scale register study combined with a small-scale interview study.  
16 302 *Int J Nurs Stud.* 2014;51(7):1003-13. Epub 2013/12/10. doi:  
17 303 10.1016/j.ijnurstu.2013.11.002. PubMed PMID: 24315543.  
18 304 16. Adams RJ, Smith BJ, Ruffin RE. Factors associated with hospital admissions and  
19 305 repeat emergency department visits for adults with asthma. *Thorax.* 2000;55(7):566-73.  
20 306 doi: 10.1136/thorax.55.7.566.  
21 307 17. Alghanim SA, Alomar BA. Frequent use of emergency departments in Saudi public  
22 308 hospitals: Implications for primary health care services. *Asia-Pac J Public Health.*  
23 309 2015;27(2):NP2521-NP30. doi: 10.1177/1010539511431603.  
24 310 18. Alpern ER, Clark AE, Alessandrini EA, Gorelick MH, Kittick M, Stanley RM, et  
25 311 al. Recurrent and high-frequency use of the emergency department by pediatric patients.  
26 312 *Academic Emergency Medicine.* 2014;21(4):365-73. doi: 10.1111/acem.12347.  
27 313 19. Arfken CL, Zeman LL, Yeager L, White A, Mischel E, Amirsadri A. Case-control  
28 314 study of frequent visitors to an urban psychiatric emergency service. *Psychiatr Serv.*  
29 315 2004;55(3):295-301. Epub 2004/03/06. doi: 10.1176/appi.ps.55.3.295. PubMed PMID:  
30 316 15001731.  
31 317 20. Bieler G, Paroz S, Faouzi M, Trueb L, Vaucher P, Althaus F, et al. Social and  
32 318 medical vulnerability factors of emergency department frequent users in a universal health  
33 319 insurance system. *Acad Emerg Med.* 2012;19(1):63-8. Epub 2012/01/10. doi:  
34 320 10.1111/j.1553-2712.2011.01246.x. PubMed PMID: 22221292.  
35 321 21. Billings J, Raven MC. Dispelling an urban legend: frequent emergency department  
36 322 users have substantial burden of disease. *Health Aff (Millwood).* 2013;32(12):2099-108.  
37 323 Epub 2013/12/05. doi: 10.1377/hlthaff.2012.1276. PubMed PMID: 24301392; PubMed  
38 324 Central PMCID: PMC4892700.  
39 325 22. Boyer L, Dassa D, Belzeaux R, Henry JM, Samuelian JC, Baumstarck-Barrau K, et  
40 326 al. Frequent visits to a French psychiatric emergency service: diagnostic variability in  
41 327 psychotic disorders. *Psychiatr Serv.* 2011;62(8):966-70. Epub 2011/08/03. doi:  
42 328 10.1176/ps.62.8.pss6208\_0966. PubMed PMID: 21807840.  
43 329 23. Brennan JJ, Chan TC, Hsia RY, Wilson MP, Castillo EM. Emergency department  
44 330 utilization among frequent users with psychiatric visits. *Acad Emerg Med.*  
45 331 2014;21(9):1015-22. Epub 2014/10/02. doi: 10.1111/acem.12453. PubMed PMID:  
46 332 25269582.

- 1  
2  
3 333 24. Buhumaid R, Riley J, Sattarian M, Bregman B, Blanchard J. Characteristics of  
4 334 frequent users of the emergency department with psychiatric conditions. *J Health Care Poor*  
5 335 *Underserved*. 2015;26(3):941-50.  
6 336 25. Cabey WV, Macneill E, White LN, Norton HJ, Mitchell AM. Frequent pediatric  
7 337 emergency department use in infancy and early childhood. *Pediatr Emerg Care*.  
8 338 2014;30(10):710-7. doi: 10.1097/PEC.0000000000000233.  
9 339 26. Castner J, Wu YWB, Mehrok N, Gadre A, Hewner S. Frequent emergency  
10 340 department utilization and behavioral health diagnoses. *Nurs Res*. 2015;64(1):3-12. doi:  
11 341 10.1097/NNR.0000000000000065.  
12 342 27. Chambers C, Chiu S, Katic M, Kiss A, Redelmeier DA, Levinson W, et al. High  
13 343 Utilizers of Emergency Health Services in a Population-Based Cohort of Homeless Adults.  
14 344 *American journal of public health*. 2013;103(S2):S302-10. doi:  
15 345 10.2105/AJPH.2013.301397. PubMed PMID: 104161876. Language: English. Entry Date:  
16 346 20131126. Revision Date: 20150711. Publication Type: Journal Article.  
17 347 28. Chang G, Weiss AP, Orav EJ, Rauch SL. Predictors of frequent emergency  
18 348 department use among patients with psychiatric illness. *Gen Hosp Psychiatry*.  
19 349 2014;36(6):716-20. Epub 2014/10/15. doi: 10.1016/j.genhosppsy.2014.09.010. PubMed  
20 350 PMID: 25312277.  
21 351 29. Chukmaitov AS, Tang A, Carretta HJ, Menachemi N, Brooks RG. Characteristics  
22 352 of all, occasional, and frequent emergency department visits due to ambulatory care-  
23 353 sensitive conditions in Florida. *J Ambul Care Manage*. 2012;35(2):149-58. doi:  
24 354 10.1097/JAC.0b013e318244d222.  
25 355 30. Colligan EM, Pines JM, Colantuoni E, Howell B, Wolff JL. Risk Factors for  
26 356 Persistent Frequent Emergency Department Use in Medicare Beneficiaries. *Ann Emerg*  
27 357 *Med*. 2016;67(6):721-9. Epub 2016/03/08. doi: 10.1016/j.annemergmed.2016.01.033.  
28 358 PubMed PMID: 26947801.  
29 359 31. Das LT, Abramson EL, Stone AE, Kondrich JE, Kern LM, Grinspan ZM.  
30 360 Predicting frequent emergency department visits among children with asthma using EHR  
31 361 data. *Pediatr Pulmonol*. 2017;52(7):880-90. doi: 10.1002/ppul.23735.  
32 362 32. Doran KM, Colucci AC, Wall SP, Williams ND, Hessler RA, Goldfrank LR, et al.  
33 363 Reasons for emergency department use: do frequent users differ? *Am J Manag Care*.  
34 364 2014;20(11):e506-e14.  
35 365 33. Doran KM, Raven MC, Rosenheck RA. What drives frequent emergency  
36 366 department use in an integrated health system? National data from the veterans health  
37 367 administration. *ANN EMERG MED*. 2013;62(2):151-9. doi:  
38 368 10.1016/j.annemergmed.2013.02.016.  
39 369 34. Fernandes AK, Mallmann F, Steinhorst AMP, Nogueira FL, Ávila EM, Saucedo  
40 370 DZ, et al. Characteristics of Acute Asthma Patients Attended Frequently Compared with  
41 371 Those Attended Only Occasionally in an Emergency Department. *J Asthma*.  
42 372 2003;40(6):683-90. doi: 10.1081/JAS-120023487.  
43 373 35. Frost DW, Vembu S, Wang J, Tu K, Morris Q, Abrams HB. Using the Electronic  
44 374 Medical Record to Identify Patients at High Risk for Frequent Emergency Department  
45 375 Visits and High System Costs. *Am J Med*. 2017;130(5):601.e17-.e22. doi:  
46 376 10.1016/j.amjmed.2016.12.008.  
47  
48  
49  
50  
51  
52  
53  
54  
55  
56  
57  
58  
59  
60

- 1  
2  
3 377 36. Grinspan ZM, Shapiro JS, Abramson EL, Hooker G, Kaushal R, Kern LM.  
4 378 Predicting frequent ED use by people with epilepsy with health information exchange data.  
5 379 *Neurology*. 2015;85(12):1031-8. doi: 10.1212/WNL.0000000000001944.
- 6 380 37. Hasegawa K, Tsugawa Y, Brown DFM, Camargo Jr CA. A population-based study  
7 381 of adults who frequently visit the emergency department for acute asthma: California and  
8 382 Florida, 2009-2010. *Ann Am Thorac Soc*. 2014;11(2):158-66. doi:  
9 383 10.1513/AnnalsATS.201306-166OC.
- 10 384 38. Huang JA, Tsai WC, Chen YC, Hu WH, Yang DY. Factors associated with frequent  
11 385 use of emergency services in a medical center. *J Formos Med Assoc*. 2003;102(4):222-8.
- 12 386 39. Hudon C, Sanche S, Haggerty JL. Personal Characteristics and Experience of  
13 387 Primary Care Predicting Frequent Use of Emergency Department: A Prospective Cohort  
14 388 Study. *PLoS One*. 2016;11(6):e0157489. Epub 2016/06/15. doi:  
15 389 10.1371/journal.pone.0157489. PubMed PMID: 27299525; PubMed Central PMCID:  
16 390 PMC4907452.
- 17 391 40. Kerr T, Wood E, Grafstein E, Ishida T, Shannon K, Lai C, et al. High rates of  
18 392 primary care and emergency department use among injection drug users in Vancouver.  
19 393 *Journal of Public Health*. 2005;27(1):62-6. doi: 10.1093/pubmed/fdh189.
- 20 394 41. Kirby SE, Dennis SM, Jayasinghe UW, Harris MF. Patient related factors in  
21 395 frequent readmissions: The influence of condition, access to services and patient choice.  
22 396 *BMC Health Serv Res*. 2010;10. doi: 10.1186/1472-6963-10-216.
- 23 397 42. Kirby SE, Dennis SM, Jayasinghe UW, Harris MF. Frequent emergency attenders:  
24 398 Is there a better way? *Aust Health Rev*. 2011;35(4):462-7. doi: 10.1071/AH10964.
- 25 399 43. Ko M, Lee Y, Chen C, Chou P, Chu D. Prevalence of and predictors for frequent  
26 400 utilization of emergency department: A population-based study. *Medicine*. 2015;94(29).  
27 401 doi: 10.1097/MD.0000000000001205.
- 28 402 44. Ledoux Y, Minner P. Occasional and frequent repeaters in a psychiatric emergency  
29 403 room. *Soc Psychiatry Psychiatr Epidemiol*. 2006;41(2):115-21. Epub 2006/03/02. doi:  
30 404 10.1007/s00127-005-0010-6. PubMed PMID: 16508721.
- 31 405 45. Legramante JM, Morciano L, Lucaroni F, Gilardi F, Caredda E, Pesaresi A, et al.  
32 406 Frequent use of emergency departments by the elderly population when continuing care is  
33 407 not well established. *PLoS ONE*. 2016;11(12). doi: 10.1371/journal.pone.0165939.
- 34 408 46. Leporatti L, Ameri M, Trincherio C, Orcamo P, Montefiori M. Targeting frequent  
35 409 users of emergency departments: Prominent risk factors and policy implications. *Health*  
36 410 *Policy*. 2016;120(5):462-70. doi: 10.1016/j.healthpol.2016.03.005.
- 37 411 47. Lim SF, Wah W, Pasupathi Y, Yap S, Koh MS, Tan KL, et al. Frequent attenders  
38 412 to the ED: patients who present with repeated asthma exacerbations. *Am J Emerg Med*.  
39 413 2014;32(8):895-9. Epub 2014/06/13. doi: 10.1016/j.ajem.2014.04.052. PubMed PMID:  
40 414 24919775.
- 41 415 48. Limsrivilai J, Stidham RW, Govani SM, Waljee AK, Huang W, Higgins PDR.  
42 416 Factors That Predict High Health Care Utilization and Costs for Patients With  
43 417 Inflammatory Bowel Diseases. *Clin Gastroenterol Hepatol*. 2017;15(3):385-92.e2. doi:  
44 418 10.1016/j.cgh.2016.09.012.
- 45 419 49. Liu SW, Nagurney JT, Chang Y, Parry BA, Smulowitz P, Atlas SJ. Frequent ED  
46 420 users: Are most visits for mental health, alcohol, and drug-related complaints? *AM J*  
47 421 *EMERG MED*. 2013;31(10):1512-5. doi: 10.1016/j.ajem.2013.08.006.

- 1  
2  
3 422 50. Mandelberg JH, Kuhn RE, Kohn MA. Epidemiologic analysis of an urban, public  
4 423 emergency department's frequent users. *Academic Emergency Medicine*. 2000;7(6):637-  
5 424 46.
- 6 425 51. Mann EG, Johnson A, VanDenKerkhof EG. Frequency and characteristics of  
7 426 healthcare visits associated with chronic pain: results from a population-based Canadian  
8 427 study. *Can J Anesth*. 2016;63(4):411-41. doi: 10.1007/s12630-015-0578-6.
- 9 428 52. McMahon CG, Power Foley M, Robinson D, O'Donnell K, Poulton M, Kenny RA,  
10 429 et al. High prevalence of frequent attendance in the over 65s. *Eur J Emerg Med*. 2016. Epub  
11 430 2016/05/04. doi: 10.1097/mej.0000000000000406. PubMed PMID: 27139928.
- 12 431 53. Milani SA, Crooke H, Cottler LB, Striley CW. Sex differences in frequent ED use  
13 432 among those with multimorbid chronic diseases. *AM J EMERG MED*. 2016;34(11):2127-  
14 433 31. doi: 10.1016/j.ajem.2016.07.059.
- 15 434 54. Mueller EL, Hall M, Carroll AE, Shah SS, Macy ML. Frequent Emergency  
16 435 Department Utilizers Among Children with Cancer. *Pediatr Blood Cancer*.  
17 436 2016;63(5):859-64. Epub 2016/02/04. doi: 10.1002/pbc.25929. PubMed PMID: 26841193.
- 18 437 55. Nambiar D, Stoové M, Dietze P. Frequent emergency department presentations  
19 438 among people who inject drugs: A record linkage study. *Int J Drug Policy*. 2017;44:115-  
20 439 20. doi: 10.1016/j.drugpo.2017.03.010.
- 21 440 56. Neufeld E, Viau KA, Hirdes JP, Warry W. Predictors of frequent emergency  
22 441 department visits among rural older adults in Ontario using the Resident Assessment  
23 442 Instrument-Home Care. *Austr J Rural Health*. 2016;24(2):115-22. doi: 10.1111/ajr.12213.
- 24 443 57. Norman C, Mello M, Choi B. Identifying Frequent Users of an Urban Emergency  
25 444 Medical Service Using Descriptive Statistics and Regression Analyses. *West J Emerg Med*.  
26 445 2016;17(1):39-45. Epub 2016/01/30. doi: 10.5811/westjem.2015.10.28508. PubMed  
27 446 PMID: 26823929; PubMed Central PMCID: PMC4729417.
- 28 447 58. Palmer E, Leblanc-Duchin D, Murray J, Atkinson P. Emergency department use:  
29 448 Is frequent use associated with a lack of primary care provider? *Can Fam Phys*.  
30 449 2014;60(4):e223-e9.
- 31 450 59. Panopalis P, Gillis JZ, Yazdany J, Trupin L, Hersh A, Julian L, et al. Frequent use  
32 451 of the emergency department among persons with systemic lupus erythematosus. *Arthritis*  
33 452 *Care Res (Hoboken)*. 2010;62(3):401-8. Epub 2010/04/15. doi: 10.1002/acr.20107.  
34 453 PubMed PMID: 20391487; PubMed Central PMCID: PMC3759153.
- 35 454 60. Paul P, Heng BH, Seow E, Molina J, Tay SY. Predictors of frequent attenders of  
36 455 emergency department at an acute general hospital in Singapore. *Emerg Med J*.  
37 456 2010;27(11):843-8. doi: 10.1136/emj.2009.079160.
- 38 457 61. Pereira M, Singh V, Hon CP, Greg McKelvey T, Sushmita S, De Cock M, editors.  
39 458 Predicting future frequent users of emergency departments in California state 2016:  
40 459 Association for Computing Machinery, Inc.
- 41 460 62. Pines JM, Buford K. Predictors of frequent emergency department utilization in  
42 461 Southeastern Pennsylvania. *J Asthma*. 2006;43(3):219-23. doi:  
43 462 10.1080/02770900600567015.
- 44 463 63. Quilty S, Shannon G, Yao A, Sargent W, McVeigh MF. Factors contributing to  
45 464 frequent attendance to the emergency department of a remote Northern Territory hospital.  
46 465 *Med J Aust*. 2016;204(3):111.e1-7.

- 1  
2  
3 466 64. Samuels-Kalow ME, Bryan MW, Shaw KN. Predicting Subsequent High-  
4 467 Frequency, Low-Acuity Utilization of the Pediatric Emergency Department. *Acad Pediatr*.  
5 468 2017;17(3):256-60. doi: 10.1016/j.acap.2016.11.008.  
6  
7 469 65. Schmoll S, Boyer L, Henry JM, Belzeaux R. [Frequent visitors to psychiatric  
8 470 emergency service: Demographical and clinical analysis]. *Encephale*. 2015;41(2):123-9.  
9 471 Epub 2013/10/08. doi: 10.1016/j.encep.2013.01.002. PubMed PMID: 24094984.  
10 472 66. Soler JJ, Sanchez L, Roman P, Martinez MA, Perpina M. Risk factors of emergency  
11 473 care and admissions in COPD patients with high consumption of health resources. *Respir*  
12 474 *Med*. 2004;98(4):318-29. Epub 2004/04/10. PubMed PMID: 15072172.  
13  
14 475 67. Sun BC, Burstin HR, Brennan TA. Predictors and outcomes of frequent emergency  
15 476 department users. *Academic Emergency Medicine*. 2003;10(4):320-8. doi:  
16 477 10.1197/aemj.10.4.320.  
17 478 68. Tangherlini N, Pletcher MJ, Covec MA, Brown JF. Frequent use of emergency  
18 479 medical services by the elderly: a case-control study using paramedic records. *Prehosp*  
19 480 *Disaster Med*. 2010;25(3):258-64. Epub 2010/06/30. PubMed PMID: 20586020.  
20  
21 481 69. Thakrar K, Morgan JR, Gaeta JM, Hohl C, Drainoni ML. Predictors of Frequent  
22 482 Emergency Room Visits among a Homeless Population. *PLoS One*. 2015;10(4):e0124552.  
23 483 Epub 2015/04/24. doi: 10.1371/journal.pone.0124552. PubMed PMID: 25906394;  
24 484 PubMed Central PMCID: PMC4407893.  
25 485 70. Vandyk AD, VanDenKerkhof EG, Graham ID, Harrison MB. Profiling Frequent  
26 486 Presenters to the Emergency Department for Mental Health Complaints: Socio-  
27 487 Demographic, Clinical, and Service Use Characteristics. *Arch Psychiatr Nurs*.  
28 488 2014;28(6):420-5. doi: 10.1016/j.apnu.2014.09.001.  
29  
30 489 71. Vinton DT, Capp R, Rooks SP, Abbott JT, Ginde AA. Frequent users of US  
31 490 emergency departments: characteristics and opportunities for intervention. *Emerg Med J*.  
32 491 2014;31(7):526-32. Epub 2014/01/30. doi: 10.1136/emmermed-2013-202407. PubMed  
33 492 PMID: 24473411.  
34 493 72. Vu F, Daepfen JB, Hugli O, Iglesias K, Stucki S, Paroz S, et al. Screening of mental  
35 494 health and substance users in frequent users of a general Swiss emergency department.  
36 495 *BMC Emerg Med*. 2015;15:27. Epub 2015/10/11. doi: 10.1186/s12873-015-0053-2.  
37 496 PubMed PMID: 26452550; PubMed Central PMCID: PMC4600290.  
38  
39 497 73. Watase H, Hagiwara Y, Chiba T, Camargo CA, Jr., Hasegawa K. Multicentre  
40 498 observational study of adults with asthma exacerbations: who are the frequent users of the  
41 499 emergency department in Japan? *BMJ Open*. 2015;5(4):e007435. Epub 2015/04/30. doi:  
42 500 10.1136/bmjopen-2014-007435. PubMed PMID: 25922104; PubMed Central PMCID:  
43 501 PMC4420980.  
44 502 74. Woo JH, Grinspan Z, Shapiro J, Rhee SY. Frequent Users of Hospital Emergency  
45 503 Departments in Korea Characterized by Claims Data from the National Health Insurance:  
46 504 A Cross Sectional Study. *PloS one*. 2016;11(1):e0147450. doi:  
47 505 10.1371/journal.pone.0147450.  
48  
49 506 75. Wu J, Grannis SJ, Xu H, Finnell JT. A practical method for predicting frequent use  
50 507 of emergency department care using routinely available electronic registration data. *BMC*  
51 508 *Emerg Med*. 2016;16:12. Epub 2016/02/11. doi: 10.1186/s12873-016-0076-3. PubMed  
52 509 PMID: 26860825; PubMed Central PMCID: PMC4748445.  
53  
54  
55  
56  
57  
58  
59



- 1  
2  
3 510 76. Hasegawa K, Tsugawa Y, Tsai CL, Brown DFM, Camargo Jr CA. Frequent  
4 511 utilization of the emergency department for acute exacerbation of chronic obstructive  
5 512 pulmonary disease. *Respir Res*. 2014;15(1). doi: 10.1186/1465-9921-15-40.
- 6 513 77. Freitag FG, Kozma CM, Slaton T, Osterhaus JT, Barron R. Characterization and  
7 514 prediction of emergency department use in chronic daily headache patients. *Headache: The*  
8 515 *Journal of Head and Face Pain*. 2005;45(7):891-8.
- 9 516 78. Friedman BW, Serrano D, Reed M, Diamond M, Lipton RB. Use of the Emergency  
10 517 Department for Severe Headache. A Population-Based Study. *Headache: The Journal of*  
11 518 *Head and Face Pain*. 2009;49(1):21-30.
- 12 519 79. O'Toole TP, Pollini R, Gray P, Jones T, Bigelow G, Ford DE. Factors identifying  
13 520 high-frequency and low-frequency health service utilization among substance-using adults.  
14 521 *J Subst Abuse Treat*. 2007;33(1):51-9.
- 15 522 80. Pasic J, Russo J, Roy-Byrne P. High utilizers of psychiatric emergency services.  
16 523 *Psychiatr Serv*. 2005;56(6):678-84. Epub 2005/06/09. doi: 10.1176/appi.ps.56.6.678.  
17 524 PubMed PMID: 15939943.
- 18 525 81. Rask KJ, Williams MV, McNagny SE, Parker RM, Baker DW. Ambulatory health  
19 526 care use by patients in a public hospital emergency department. *J Gen Intern Med*.  
20 527 1998;13(9):614-20.
- 21 528 82. Blonigen DM, Macia KS, Bi X, Suarez P, Manfredi L, Wagner TH. Factors  
22 529 associated with emergency department use among veteran psychiatric patients. *Psychiatr*  
23 530 *Q*. 2017;1-12. doi: 10.1007/s11126-017-9490-2.
- 24 531 83. Hasegawa K, Tsugawa Y, Camargo CA, Jr., Brown DF. Frequent utilization of the  
25 532 emergency department for acute heart failure syndrome: a population-based study. *Circ*  
26 533 *Cardiovasc Qual Outcomes*. 2014;7(5):735-42. Epub 2014/08/21. doi:  
27 534 10.1161/circoutcomes.114.000949. PubMed PMID: 25139183.
- 28 535 84. Huynh C, Ferland F, Blanchette-Martin N, Ménard JM, Fleury MJ. Factors  
29 536 Influencing the Frequency of Emergency Department Utilization by Individuals with  
30 537 Substance Use Disorders. *Psychiatr Q*. 2016;87(4):713-28. doi: 10.1007/s11126-016-  
31 538 9422-6.
- 32 539 85. Lin WC, Bharel M, Zhang J, O'Connell E, Clark RE. Frequent emergency  
33 540 department visits and hospitalizations among homeless people with medicaid: Implications  
34 541 for medicaid expansion. *American journal of public health*. 2015;105:S716-S22. doi:  
35 542 10.2105/AJPH.2015.302693.
- 36 543 86. Beck A, Sanchez-Walker E, Evans LJ, Harris V, Pegler R, Cross S. Characteristics  
37 544 of people who rapidly and frequently reattend the emergency department for mental health  
38 545 needs. *Eur J Emerg Med*. 2016;23(5):351-5. Epub 2015/12/03. doi:  
39 546 10.1097/mej.0000000000000349. PubMed PMID: 26629766.
- 40 547 87. Andrén KG, Rosenqvist U. Heavy users of an emergency department-A two year  
41 548 follow-up study. *Soc Sci Med*. 1987;25(7):825-31. doi: 10.1016/0277-9536(87)90040-2.
- 42 549 88. Girts TK, Crawford AG, Goldfarb NI, Bachleda M, Grogg A. Predicting high  
43 550 utilization of emergency department services among patients with a diagnosis of psychosis  
44 551 in a medicaid managed care organization. *Dis Manage*. 2002;5(4):189-96.
- 45 552 89. Christensen EW, Kharbanda AB, Velden HV, Payne NR. Predicting Frequent  
46 553 Emergency Department Use by Pediatric Medicaid Patients. *Popul Health Manag*.  
47 554 2017;20(3):208-15. doi: 10.1089/pop.2016.0051.

- 1  
2  
3 555 90. Hardie TL, Polek C, Wheeler E, McCamant K, Dixon M, Gailey R, et al.  
4 556 Characterising emergency department high-frequency users in a rural hospital. *Emerg Med*  
5 557 *J*. 2015;32(1):21-5. doi: 10.1136/emered-2013-202369.  
6 558 91. Meyer JP, Qiu J, Chen NE, Larkin GL, Altice FL. Frequent emergency department  
7 559 use among released prisoners with human immunodeficiency virus: Characterization  
8 560 including a novel multimorbidity index. *Academic Emergency Medicine*. 2013;20(1):79-  
9 561 88. doi: 10.1111/acem.12054.  
10 562 92. Milbrett P, Halm M. Characteristics and predictors of frequent utilization of  
11 563 emergency services. *J Emerg Nurs*. 2009;35(3):191-8; quiz 273. Epub 2009/05/19. doi:  
12 564 10.1016/j.jen.2008.04.032. PubMed PMID: 19446122.  
13 565 93. Neuman MI, Alpern ER, Hall M, Kharbanda AB, Shah SS, Freedman SB, et al.  
14 566 Characteristics of recurrent utilization in pediatric emergency departments. *Pediatrics*.  
15 567 2014;134(4):e1025-e31. doi: 10.1542/peds.2014-1362.  
16 568 94. Ngamini-Ngui A, Fleury MJ, Moisan J, Grégoire JP, Lesage A, Vanasse A. High  
17 569 users of emergency departments in quebec among patients with both schizophrenia and a  
18 570 substance use disorder. *Psychiatr Serv*. 2014;65(11):1389-91.  
19 571 95. Altman DG. *Practical statistics for medical research*. London: CRC press; 1990.  
20 572 96. Moe J, Bailey AL, Oland R, Levesque L, Murray H. Defining, quantifying, and  
21 573 characterizing adult frequent users of a suburban Canadian emergency department. *Can J*  
22 574 *Emerg Med*. 2013;15(4):214-26. doi: 10.2310/8000.2013.130936.  
23 575 97. Wajnberg A, Hwang U, Torres L, Yang S. Characteristics of frequent geriatric users  
24 576 of an urban emergency department. *J Emerg Med*. 2012;43(2):376-81. Epub 2011/11/02.  
25 577 doi: 10.1016/j.jemermed.2011.06.056. PubMed PMID: 22040771.  
26 578 98. Kononenko I. Machine learning for medical diagnosis: history, state of the art and  
27 579 perspective. *Artif Intell Med*. 2001;23(1):89-109. Epub 2001/07/27. PubMed PMID:  
28 580 11470218.  
29 581 99. Liao S-H, Chu P-H, Hsiao P-Y. Data mining techniques and applications—A decade  
30 582 review from 2000 to 2011. *Expert systems with applications*. 2012;39(12):11303-11.  
31 583 100. Wang S, Summers RM. Machine learning and radiology. *Med Image Anal*.  
32 584 2012;16(5):933-51. Epub 2012/04/03. doi: 10.1016/j.media.2012.02.005. PubMed PMID:  
33 585 22465077; PubMed Central PMCID: PMC3372692.  
34 586 101. Kourou K, Exarchos TP, Exarchos KP, Karamouzis MV, Fotiadis DI. Machine  
35 587 learning applications in cancer prognosis and prediction. *Comput Struct Biotechnol J*.  
36 588 2015;13:8-17. Epub 2015/03/10. doi: 10.1016/j.csbj.2014.11.005. PubMed PMID:  
37 589 25750696; PubMed Central PMCID: PMC3372692.  
38 590 102. Ramos-Pollan R, Guevara-Lopez MA, Suarez-Ortega C, Diaz-Herrero G, Franco-  
39 591 Valiente JM, Rubio-Del-Solar M, et al. Discovering mammography-based machine  
40 592 learning classifiers for breast cancer diagnosis. *J Med Syst*. 2012;36(4):2259-69. Epub  
41 593 2011/04/12. doi: 10.1007/s10916-011-9693-2. PubMed PMID: 21479624.  
42 594 103. Murdoch TB, Detsky AS. The inevitable application of big data to health care.  
43 595 *JAMA*. 2013;309(13):1351-2. Epub 2013/04/04. doi: 10.1001/jama.2013.393. PubMed  
44 596 PMID: 23549579.  
45 597 104. Hastie T, Tibshirani R, Friedman J. *The Elements of Statistical Learning*. New  
46 598 York: Springer; 2009.  
47 599 105. Jolliffe IT. *Principal Component Analysis and Factor Analysis*. *Principal*  
50 600 *component analysis*: Springer; 1986. p. 115-28.

- 1  
2  
3 601 106. Burgel PR, Paillasseur JL, Caillaud D, Tillie-Leblond I, Chanez P, Escamilla R, et  
4 602 al. Clinical COPD phenotypes: a novel approach using principal component and cluster  
5 603 analyses. *European Respiratory Journal*. 2010;36(3):531-9.  
6 604 107. Gordon DB, Polomano RC, Pellino TA, Turk DC, McCracken LM, Sherwood G,  
7 605 et al. Revised American Pain Society Patient Outcome Questionnaire (APS-POQ-R) for  
8 606 quality improvement of pain management in hospitalized adults: preliminary psychometric  
9 607 evaluation. *J Pain*. 2010;11(11):1172-86. Epub 2010/04/20. doi:  
10 608 10.1016/j.jpain.2010.02.012. PubMed PMID: 20400379.  
11 609 108. Gasquet I, Villeminot S, Estaquio C, Durieux P, Ravaud P, Falissard B.  
12 610 Construction of a questionnaire measuring outpatients' opinion of quality of hospital  
13 611 consultation departments. *Health Qual Life Outcomes*. 2004;2(1):43. Epub 2004/08/06.  
14 612 doi: 10.1186/1477-7525-2-43. PubMed PMID: 15294020; PubMed Central PMCID:  
15 613 PMC516447.  
16 614 109. Koenker R. *Quantile regression*: Cambridge university press; 2005.  
17 615 110. Ding R, McCarthy ML, Desmond JS, Lee JS, Aronsky D, Zeger SL. Characterizing  
18 616 waiting room time, treatment time, and boarding time in the emergency department using  
19 617 quantile regression. *Academic Emergency Medicine*. 2010;17(8):813-23.  
20 618 111. Bottai M, Cai B, McKeown RE. Logistic quantile regression for bounded outcomes.  
21 619 *Stat Med*. 2010;29(2):309-17. Epub 2009/11/27. doi: 10.1002/sim.3781. PubMed PMID:  
22 620 19941281.  
23  
24  
25  
26  
27 621  
28  
29  
30  
31  
32  
33  
34  
35  
36  
37  
38  
39  
40  
41  
42  
43  
44  
45  
46  
47  
48  
49  
50  
51  
52  
53  
54  
55  
56  
57  
58  
59  
60

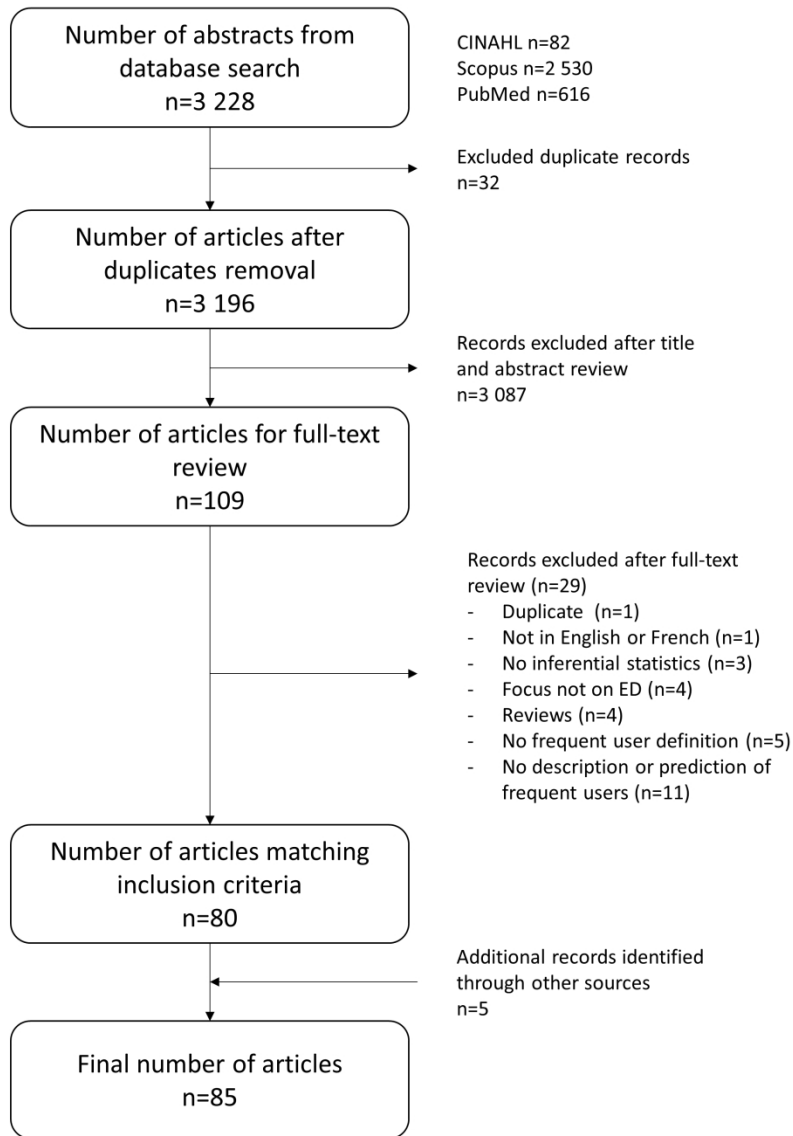

Fig 1. PRISMA flow diagram.

190x275mm (300 x 300 DPI)

1  
2  
3  
4  
5  
6  
7  
8  
9  
10  
11  
12  
13  
14  
15  
16  
17  
18  
19  
20  
21  
22  
23  
24  
25  
26  
27  
28  
29  
30  
31  
32  
33  
34  
35  
36  
37  
38  
39  
40  
41  
42  
43  
44  
45  
46  
47  
48  
49  
50  
51  
52  
53  
54  
55  
56  
57  
58  
59  
60

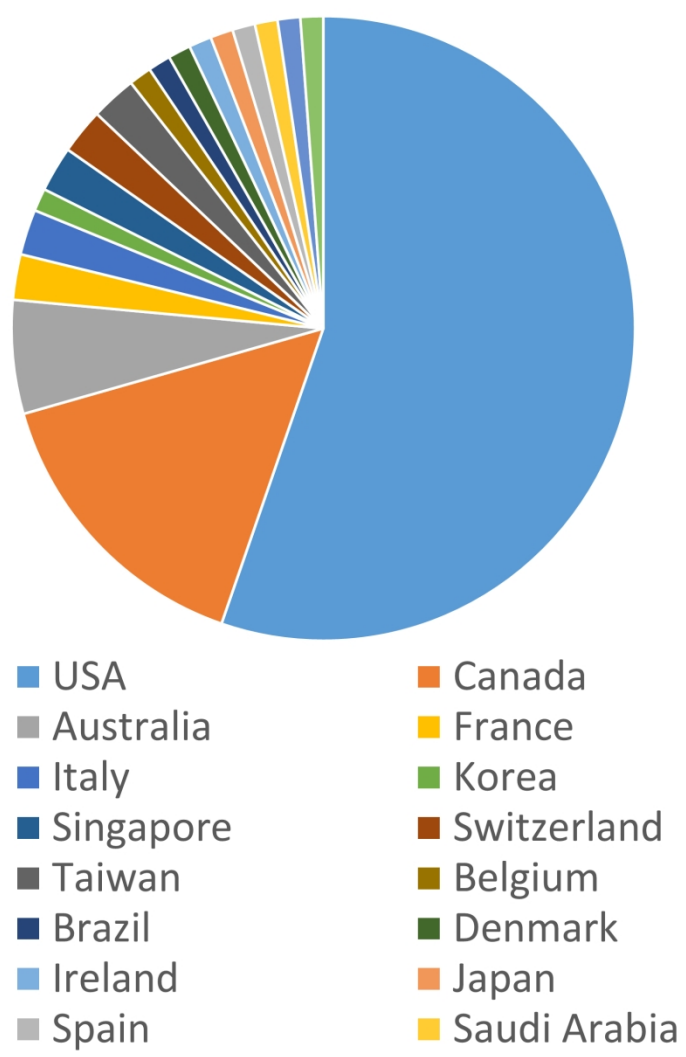

Fig 2. Number of studies by country.  
189x209mm (300 x 300 DPI)

Research strategies used in:

- **CINAHL:** ( "revolving door" OR (frequen\* OR high OR heavy OR repeat) N3 (hospital\* OR utili?ation OR attend\* OR consult\* OR visit\* OR flyer\* OR use\* OR patient\*)) AND "emergency department" AND ((statistic\* OR predict\* OR \*variate OR model\* OR "regression")
- **Scopus:** TITLE-ABS-KEY ( "revolving door" OR ( frequen\* OR high OR heavy OR repeat ) W/3 ( hospital\* OR utili?ation OR attend\* OR consult\* OR visit\* OR flyer\* OR use\* OR patient\* ) ) AND TITLE-ABS-KEY ( "emergency department" ) AND ( TITLE-ABS-KEY ( predict\* OR "univariate" OR "multivariate" OR model\* OR "regression" ) OR KEY ( {statistics and numerical data} ) ) AND ( EXCLUDE ( EXACTKEYWORD , "Controlled Study " ) OR EXCLUDE ( EXACTKEYWORD , " Comparative Study " ) OR EXCLUDE ( EXACTKEYWORD , "Clinical Trial" ) OR EXCLUDE ( EXACTKEYWORD , " Controlled Clinical Trial " ) )
- **PUBMED:** (((("Emergency Medical Services"[Mesh] OR emergency OR emergencies)) AND ("repeat use" OR "heavy user" OR "heavy users" OR "high attender" OR "high attenders" OR "high attendance" OR "high use" OR "high uses" OR "high user" OR "high users" OR "high utilisation" OR "high utilization" OR "frequent consultation" OR "frequent consultations" OR "frequent consultant" OR "frequent consultants" OR "frequent consult" OR "frequent consults" OR "frequent attender" OR "frequent attenders" OR "frequent attendance" OR "frequent visit" OR "frequent visits" OR "frequent visitor" OR "frequent visitors" OR "frequent flyer" OR "frequent flyers" OR "frequent use" OR "frequent uses" OR "frequent

1  
2  
3 user" OR "frequent users" OR "frequent utilisation" OR "frequent utilization" OR  
4  
5 "high consultation" OR "high consultations" OR "high consultant" OR "high  
6  
7 consultants" OR "high consult" OR "high consults" OR "frequent hospitalisation"  
8  
9 OR "frequent hospitalisations" OR "frequent hospitalization" OR "frequent  
10  
11 hospitalizations" OR "repeat hospitalisation" OR "repeat hospitalisations" OR  
12  
13 "repeat hospitalization" OR "repeat hospitalizations" OR "revolving door")) AND  
14  
15 ("Statistics"[Mesh] OR "predictive" OR "univariate" OR "multivariate" OR  
16  
17 "prediction" OR "model" OR "models" OR "modeling" OR "modelization" OR  
18  
19 "modelling" OR "modelisation" OR "regression")  
20  
21  
22  
23  
24  
25  
26  
27  
28  
29  
30  
31  
32  
33  
34  
35  
36  
37  
38  
39  
40  
41  
42  
43  
44  
45  
46  
47  
48  
49  
50  
51  
52  
53  
54  
55  
56  
57  
58  
59  
60

# BMJ Open

## Statistical tools used for analyses of frequent users of emergency department: A scoping review

|                                 |                                                                                                                                                                                                                                                                                                                                                                                                                                                                                                                                                                                                                                                                                                                       |
|---------------------------------|-----------------------------------------------------------------------------------------------------------------------------------------------------------------------------------------------------------------------------------------------------------------------------------------------------------------------------------------------------------------------------------------------------------------------------------------------------------------------------------------------------------------------------------------------------------------------------------------------------------------------------------------------------------------------------------------------------------------------|
| Journal:                        | <i>BMJ Open</i>                                                                                                                                                                                                                                                                                                                                                                                                                                                                                                                                                                                                                                                                                                       |
| Manuscript ID                   | bmjopen-2018-027750.R1                                                                                                                                                                                                                                                                                                                                                                                                                                                                                                                                                                                                                                                                                                |
| Article Type:                   | Research                                                                                                                                                                                                                                                                                                                                                                                                                                                                                                                                                                                                                                                                                                              |
| Date Submitted by the Author:   | 22-Mar-2019                                                                                                                                                                                                                                                                                                                                                                                                                                                                                                                                                                                                                                                                                                           |
| Complete List of Authors:       | Chiu, Yohann; Université de Sherbrooke, Department of family medicine and emergency medicine<br>Racine-Hemmings, François; Université de Sherbrooke, Department of family medicine and emergency medicine<br>Dufour, Isabelle; Université de Sherbrooke, Department of family medicine and emergency medicine<br>Vanasse, Alain; Université de Sherbrooke, Department of family medicine and emergency medicine<br>Chouinard, Maud-Christine; Université du Québec à Chicoutimi, Department of Health Sciences<br>Bisson, Mathieu; Université de Sherbrooke, Department of family medicine and emergency medicine<br>Hudon, Catherine; Université de Sherbrooke, Department of family medicine and emergency medicine |
| <b>Primary Subject Heading</b>: | Health services research                                                                                                                                                                                                                                                                                                                                                                                                                                                                                                                                                                                                                                                                                              |
| Secondary Subject Heading:      | Research methods, Emergency medicine                                                                                                                                                                                                                                                                                                                                                                                                                                                                                                                                                                                                                                                                                  |
| Keywords:                       | STATISTICS & RESEARCH METHODS, FREQUENT USERS, ACCIDENT & EMERGENCY MEDICINE                                                                                                                                                                                                                                                                                                                                                                                                                                                                                                                                                                                                                                          |
|                                 |                                                                                                                                                                                                                                                                                                                                                                                                                                                                                                                                                                                                                                                                                                                       |

SCHOLARONE™  
Manuscripts



1  
2  
3  
4 1 Statistical tools used for analyses of frequent users  
5 of emergency department: A scoping review  
6  
7  
8  
9

10 4 Yohann M. Chiu<sup>1\*</sup>, François Racine-Hemmings<sup>1</sup>, Isabelle Dufour<sup>1</sup>, Alain  
11 Vanasse<sup>1</sup>, Maud-Christine Chouinard<sup>2</sup>, Mathieu Bisson<sup>1</sup>, Catherine Hudon<sup>1</sup>  
12  
13  
14  
15

16 6 <sup>1</sup> Département de médecine de famille et de médecine d'urgence, Université  
17 de Sherbrooke, Sherbrooke, Québec, Canada  
18  
19  
20  
21

22 8 <sup>2</sup> Département des sciences de la santé, Université du Québec à Chicoutimi,  
23 Chicoutimi, Québec, Canada  
24  
25  
26  
27

28 10 \* Correspondence: [yohann.chiu@usherbrooke.ca](mailto:yohann.chiu@usherbrooke.ca)  
29  
30  
31

32 11  
33  
34  
35  
36  
37  
38  
39  
40  
41  
42  
43  
44  
45  
46  
47  
48  
49  
50  
51  
52  
53  
54  
55  
56  
57  
58  
59  
60

## 12 **Abstract**

13 **Objective:** Frequent users represent a small proportion of emergency department users,  
14 but they account for a disproportionately large number of visits. Their use of emergency  
15 departments is often considered suboptimal. It would be more efficient to identify and treat  
16 those patients earlier in their health problem trajectory. It is therefore essential to describe  
17 their characteristics and to predict their emergency department use. In order to do so,  
18 adequate statistical tools are needed. The objective of this study was to determine the  
19 statistical tools used in identifying variables associated with frequent use or predicting the  
20 risk of becoming a frequent user.

21 **Methods:** We performed a scoping review following an established 5-stage  
22 methodological framework. We searched PubMed, Scopus, and CINAHL databases in  
23 February 2019 using search strategies defined with the help of an information specialist.  
24 Out of 4,534 potential abstracts, we selected 114 articles based on defined criteria and  
25 presented in a content analysis.

26 **Results:** We identified four classes of statistical tools. Regression models were found to  
27 be the most common practice, followed by hypothesis testing. The logistic regression was  
28 found to be the most used statistical tool, followed by chi-square test and t-test of  
29 associations between variables. Other tools were marginally used.

30 **Conclusions:** This scoping review lists common statistical tools used for analyzing  
31 frequent users in emergency departments. It highlights the fact that some are well  
32 established while others are much less so. More research is needed to apply appropriate  
33 techniques to health data or to diversify statistical point of views.

1  
2  
3  
4 34 **Article summary**  
5

6  
7 35 **Strengths and limitations of this study**  
8

- 9  
10 36 • First overview of statistical tools used in frequent users analysis  
11  
12 37 • Follows a well-defined methodological framework in an extensive body of  
13  
14 38 literature  
15  
16 39 • Quality assessment is not performed in a scoping review  
17  
18  
19 40 • Studies in other languages than English or French might have been missed  
20  
21  
22  
23 41

## 1. Background

Emergency department (ED) “frequent users” are a sub-group of ED users that make repeated, multiple visits during a given amount of time. Though there is no consensus about definition for frequent users, thresholds in the literature range from two to more than ten ED visits per year [1, 2], while the most common one is more than four ED visits per year [1, 2]. Frequent users represent a small proportion of ED users but account for a large number of visits [3-5]. They often display complex characteristics such as low socioeconomic status combined with physical and mental health issues [6]. As such, their ED use is considered suboptimal [7], as the best strategy would be to identify those patients at an earlier stage in their health problem trajectory, in order to treat them more efficiently [8]. Furthermore, frequent users’ visits may lead to overcrowding in EDs and decreased quality of care [2]. Identifying factors that best describe those users and predict their ED use is therefore an essential task to improve ED care as well as frequent users’ health problems. Adequate statistical tools are needed to that end. Although they are numerous, no literature review has been published yet about statistical tools used for analyzing ED frequent users. Therefore, the aim of our study was to draw up a list of statistical tools used in identifying variables associated with frequent use or predicting the risk of becoming a frequent user.

## 2. Methods

In order to list the statistical tools used in describing variables associated with and prediction of frequent ED use, we conducted a scoping review. We followed the 5-stage methodology of Arksey and O'Malley [9] adapted by Levac *et al.* [10]. The methodological

1  
2  
3 64 framework of a scoping review allows “mapping rapidly the key concepts underpinning a  
4  
5 65 research area and the main sources and types of evidence available” [11], thus allowing us  
6  
7  
8 66 to identify gaps in the literature and future research opportunities.  
9

### 10 11 67 **Stage 1: Identifying the research question** 12

13  
14 68 We defined our research question as follows: What statistical tools are used in the  
15  
16 69 identification of variables associated with frequent ED users and in their prediction?  
17

### 18 19 70 **Stage 2: Identifying relevant studies** 20

21  
22 71 We searched PubMed, CINAHL, and Scopus databases in February 2019, using search  
23  
24 72 strategies developed with the help of an information specialist (see the supplementary  
25  
26 73 appendix for the complete search strategy). Keywords included variants of “frequent  
27  
28  
29 74 users”, “emergency departments” and “statistical tools”.  
30

31  
32 75 There were no restriction regarding the population age or sex, health conditions, study  
33  
34 76 period or country.  
35

### 36 37 77 **Stage 3: Study selection** 38

39  
40 78 Articles written in French or in English were included using the following criteria:  
41

- 42  
43 79 • The study must focus on frequent users of EDs (studies focusing on re-visits or on  
44  
45 80 frequent visits other than in EDs were excluded);  
46  
47  
48 81 • The study must have an explicit definition of frequent users, such as four visits in  
49  
50 82 one year (reviews were excluded);  
51  
52  
53  
54  
55  
56  
57  
58  
59  
60

- 83 • The study must use at least one statistical tool that is classified as inferential (not  
84 descriptive, as defined by The Cambridge Dictionary of Statistics [12]), such as  
85 hypothesis tests, regression models, decision trees, or others;
- 86 • The study's objectives must include identifying variables associated with frequent  
87 use or predicting the risk of becoming a frequent user.

88 We collected 4,534 potential abstracts (Fig 1). Of those, 32 were duplicates, and 4,344  
89 were excluded by an investigator (YC) after reading the title and the abstract. At this stage,  
90 studies were discarded if it was explicit from the title and the abstract that they were unfit  
91 for the scoping review (for instance studies about frequent use of inpatient services,  
92 systematic reviews, etc.). In case of uncertainty, studies were kept for complete reading.  
93 Then, YC and FRH or ID independently evaluated the remaining 158 full text articles, of  
94 which 109 matched the above criteria. A third evaluator was consulted in case of  
95 discrepancy. Reasons for exclusion were: not in French or English (one), duplicate (three),  
96 systematic review (four), no inferential statistics (five), no explicit definition of frequent  
97 users (five), focus not on ED (fourteen), no description or prediction of frequent users  
98 (seventeen). A reference search among the references of the 109 included articles yielded  
99 five relevant articles. Thus, 114 articles were included in this study, of which YC, ID, and  
100 MB examined the full texts.

101 **Fig 1. PRISMA flow diagram.**

## 102 **Stage 4: Charting the data**

103 YC, MB and ID independently extracted the corresponding data. Reported characteristics  
104 were the first (two) author(s), the publication year, the study location, the population, the

105 frequent users' definition, the objectives, the sample size, and the statistical tools used  
 106 concerning the research question.

## 107 **Stage 5: Collating, summarizing and reporting the results**

108 The results are reported via a content analysis [13].

## 109 **Patient and public involvement**

110 Patients or public were not involved in this study.

## 111 **3. Results**

112 The studies main characteristics are presented in Table 1. Out of 114 studies, 65 were  
 113 conducted in the United States, 17 in Canada and 8 in Australia (Fig 2). The various  
 114 statistical tools were classified into four main categories: regression, hypothesis testing,  
 115 machine learning, and other tools.

116 **Table 1. Main characteristics of the 86 included studies.**

| Authors, year, and country                     | Population                        | Frequent user definition | Study main objectives                                                                                                                                                                             | Study cohort size | Statistical tools used                                                                                |
|------------------------------------------------|-----------------------------------|--------------------------|---------------------------------------------------------------------------------------------------------------------------------------------------------------------------------------------------|-------------------|-------------------------------------------------------------------------------------------------------|
| Aagaard, J. <i>et al.</i><br>2013<br>Denmark   | Psychiatric                       | ≥5 visits per year       | To identify predictors of frequent use of a psychiatric emergency room                                                                                                                            | 8,034             | Logistic regression                                                                                   |
| Adams, R.J. <i>et al.</i><br>2000<br>Australia | Adults with asthma                | ≥2 visits per year       | To identify whether factors other than severity and low socioeconomic status were associated with this disproportionate use                                                                       | 293               | Logistic regression                                                                                   |
| Ahn, E. <i>et al.</i><br>2018<br>Australia     | General population aged ≤70 years | ≥4 visits per year       | To examine the characteristics of frequent visitors to EDs and develop a predictive model to identify those with high risk of a future representations to ED among younger and general population | 170,134           | Maximum likelihood monotone coarse classifier algorithm<br>Logistic regression<br>Mixed-effects model |

|                               |                                   |                                        |                                                                                                                                                                                                                                                                                             |           |                                                                                         |
|-------------------------------|-----------------------------------|----------------------------------------|---------------------------------------------------------------------------------------------------------------------------------------------------------------------------------------------------------------------------------------------------------------------------------------------|-----------|-----------------------------------------------------------------------------------------|
| Alghanim, S.A. & Alomar, B.A. | All                               | $\geq 3$ visits per year               | To determine the prevalence of frequent use of EDs in public hospitals, to determine factors associated with such use, and to identify patients' reasons for frequent use                                                                                                                   | 666       | Chi-square test<br>Logistic regression                                                  |
| 2015<br>Saudi Arabia          |                                   |                                        |                                                                                                                                                                                                                                                                                             |           |                                                                                         |
| Alpern, E.R. <i>et al.</i>    | All                               | $\geq 4$ visits per year               | To describe the epidemiology of and risk factors for recurrent and high frequency use of the ED by children                                                                                                                                                                                 | 695,188   | Negative binomial regression<br>Logistic regression<br>Generalized estimating equations |
| 2014<br>United States         |                                   |                                        |                                                                                                                                                                                                                                                                                             |           |                                                                                         |
| Andren, K.G. & Rosenqvist, U. | All                               | $\geq 4$ visits per year               | To follow a cohort of heavy ED users with regard to changes in medical and psycho-social profiles and ED use and to identify predictors for a maintained high use of ED services and the relationship between changes in access to social networks and utilization of medical care services | 232       | Decision trees<br>Linear regression                                                     |
| 1987<br>Sweden                |                                   |                                        |                                                                                                                                                                                                                                                                                             |           |                                                                                         |
| Andrews, C.M. <i>et al.</i>   | Medicaid enrollees with addiction | $\geq 2$ visits during a 2 year-period | To examine whether the number of outpatient addiction programs accepting Medicaid in South Carolina counties is linked to repeat use of the emergency department for addiction-related conditions                                                                                           | 2,401     | Logistic regression                                                                     |
| 2018<br>United States         |                                   |                                        |                                                                                                                                                                                                                                                                                             |           |                                                                                         |
| Arfken, C.L. <i>et al.</i>    | Psychiatric                       | $\geq 6$ visits per year               | To identify risk factors for people who use psychiatric emergency services repeatedly and to estimate their financial charges                                                                                                                                                               | 74        | Logistic regression                                                                     |
| 2004<br>United States         |                                   |                                        |                                                                                                                                                                                                                                                                                             |           |                                                                                         |
| Batra, P. <i>et al.</i>       | Women                             | $\geq 3$ visits per 3 months           | To use population data to identify patient characteristics associated with a postpartum maternal emergency department visit within 90 days of discharge after birth                                                                                                                         | 1,071,232 | Logistic regression<br>Receiver operating characteristic curve                          |
| 2017<br>United States         |                                   |                                        |                                                                                                                                                                                                                                                                                             |           |                                                                                         |
| Beck, A. <i>et al.</i>        | Mental health                     | $\geq 3$ visits in 3 months            | To statistically identify characteristics associated with a shorter time to re-attendance and a higher number of overall ED admissions with a Mental Health Liaison Service referral                                                                                                        | 24,010    | Cox regression<br>Negative binomial regression                                          |
| 2016<br>United Kingdom        |                                   |                                        |                                                                                                                                                                                                                                                                                             |           |                                                                                         |
| Bieler, G. <i>et al.</i>      | All                               | $\geq 4$ visits per year               | To identify the social and medical factors associated                                                                                                                                                                                                                                       | 719       | Wilcoxon rank-sum test                                                                  |
|                               |                                   |                                        |                                                                                                                                                                                                                                                                                             |           |                                                                                         |



|                                |                      |                                                                                       |  |                                                                                                                                                                                               |         |                                                                                    |
|--------------------------------|----------------------|---------------------------------------------------------------------------------------|--|-----------------------------------------------------------------------------------------------------------------------------------------------------------------------------------------------|---------|------------------------------------------------------------------------------------|
| 2012                           | Switzerland          |                                                                                       |  | with frequent ED use and to determine if frequent users were more likely to have a combination of these factors in a universal health insurance system                                        |         | Logistic regression                                                                |
| Billings, J. & Raven, M.C.     | All                  | ≥3 visits per year<br>≥5 visits per year<br>≥8 visits per year<br>≥10 visits per year |  | To examine whether it is possible to predict who will become a frequent ED user with predictive modeling and to compare ED expenditures to total Medicaid services expenditures               | 212,259 | Logistic regression                                                                |
| 2013                           | United States        |                                                                                       |  |                                                                                                                                                                                               |         |                                                                                    |
| Birmingham, L.E. <i>et al.</i> | All                  | ≥4 visits per year                                                                    |  | To characterize frequent ED users, including their reason for presenting to the ED and to identify perceived barriers to care from the users' perspective                                     | 1,523   | t-test<br>Chi-square test<br>Wilcoxon rank-sum test                                |
| 2017                           | United States        |                                                                                       |  |                                                                                                                                                                                               |         |                                                                                    |
| Blair, M. <i>et al.</i>        | Children             | ≥4 visits per year                                                                    |  | To describe the sociodemographic and clinical characteristics of preschoolers who attend ED a large District General Hospital                                                                 | 10,169  | Chi-square test<br>Poisson regression<br>Mann-Whitney U test                       |
| 2017                           | United-Kingdom       |                                                                                       |  |                                                                                                                                                                                               |         |                                                                                    |
| Blonigen, D.M. <i>et al.</i>   | Veteran psychiatric  | ≥5 visits per year                                                                    |  | To identify patient-level factors associated with ED use among veteran psychiatric patients and to examine factors associated with different subgroups of ED users including "high utilizers" | 226,122 | Chi-square test<br>Zero-truncated negative binomial regression<br>Logit regression |
| 2011                           | France               |                                                                                       |  |                                                                                                                                                                                               |         |                                                                                    |
| Boyer, L. <i>et al.</i>        | Psychiatric          | ≥6 visits per year                                                                    |  | To examine characteristics of frequent visitors to a psychiatric emergency service in a French public teaching hospital over six years                                                        | 1,285   | Logistic regression                                                                |
| 2014                           | United States        |                                                                                       |  |                                                                                                                                                                                               |         |                                                                                    |
| Brennan, J.J. <i>et al.</i>    | Psychiatric          | ≥4 visits per year                                                                    |  | To assess the incidence of psychiatric visits among frequent ED users and utilization among frequent psychiatric users                                                                        | 788,005 | Kruskal-Wallis test<br>Mann-Whitney U test<br>Logistic regression                  |
| 2015                           | United States        |                                                                                       |  |                                                                                                                                                                                               |         |                                                                                    |
| Buhumaid, R. <i>et al.</i>     | Psychiatric          | ≥4 visits per year                                                                    |  | To evaluate demographic factors associated with increased ED use among people with psychiatric conditions                                                                                     | 569     | Logistic regression                                                                |
| 2018                           | United States        |                                                                                       |  |                                                                                                                                                                                               |         |                                                                                    |
| Burner, E. <i>et al.</i>       | People with diabetes | ≥3 visits per 6 months                                                                |  | To describe characteristics of patients with poorly controlled diabetes who have high ED utilization, and compare them with                                                                   | 108     | Logistic regression                                                                |

|    |                                    |                                                       |                                                                         |                                                                                                                                                                                                                                            |                              |                                                                                              |
|----|------------------------------------|-------------------------------------------------------|-------------------------------------------------------------------------|--------------------------------------------------------------------------------------------------------------------------------------------------------------------------------------------------------------------------------------------|------------------------------|----------------------------------------------------------------------------------------------|
|    |                                    |                                                       |                                                                         | patients with lower ED utilization                                                                                                                                                                                                         |                              |                                                                                              |
| 6  | Cabey, W.V.<br><i>et al.</i>       | All                                                   | 90th percentile                                                         | To define the threshold and population factors associated with pediatric ED use above the norm during the first 36 months of life                                                                                                          | 16,664                       | Nonparametric distribution fit<br>Logistic regression<br>Bootstrap<br>Clopper-Pearson method |
| 8  | 2014<br>United States              |                                                       |                                                                         |                                                                                                                                                                                                                                            |                              |                                                                                              |
| 13 | Castner, J. <i>et al.</i>          | People with psychiatric and substance abuse diagnoses | $\geq 3$ visits per year                                                | To stratify individuals by overall health complexity and examine the relationship of behavioral health diagnoses (psychiatric and substance abuse) as well as frequent treat-and-release ED utilization in a cohort of Medicaid recipients | 56,491                       | Logistic regression                                                                          |
| 15 | 2015<br>United States              |                                                       |                                                                         |                                                                                                                                                                                                                                            |                              |                                                                                              |
| 21 | Chambers, C.<br><i>et al.</i>      | Homeless                                              | 90th percentile                                                         | To identify predictors of ED use among a population-based prospective cohort of homeless adults in Toronto, Ontario                                                                                                                        | 1,165                        | Logistic regression                                                                          |
| 23 | 2013<br>Canada                     |                                                       |                                                                         |                                                                                                                                                                                                                                            |                              |                                                                                              |
| 27 | Chang, G. <i>et al.</i>            | Psychiatric                                           | $\geq 4$ visits per year or $\geq 3$ visits during 2 consecutive months | To identify the patient characteristics associated with frequent ED use and develop a tool to predict risk for returning in the next month                                                                                                 | 863                          | Chi-square test<br>Logistic regression                                                       |
| 29 | 2014<br>United States              |                                                       |                                                                         |                                                                                                                                                                                                                                            |                              |                                                                                              |
| 34 | Christensen, E.W.<br><i>et al.</i> | All                                                   | $\geq 4$ visits per year                                                | To determine the patient characteristics and health care utilization patterns that predict frequent ED use ( $\geq 4$ visits per year) over time to assist health care organizations in targeting patients for care management             | 13,265                       | Zero-inflated Poisson regression<br>Receiver operating characteristic curve                  |
| 36 | 2017<br>United States              |                                                       |                                                                         |                                                                                                                                                                                                                                            |                              |                                                                                              |
| 41 | Chukmaitov, A.S.<br><i>et al.</i>  | People with ambulatory care-sensitive conditions      | $\geq 4$ visits per year                                                | To study characteristics of all, occasional, and frequent ED visits due to ambulatory care-sensitive conditions                                                                                                                            | 4,914,933 (number of visits) | Logistic regression                                                                          |
| 43 | 2012<br>United States              |                                                       |                                                                         |                                                                                                                                                                                                                                            |                              |                                                                                              |
| 46 | Colligan, E.M.<br><i>et al.</i>    | Medicare beneficiaries                                | $\geq 4$ visits per year                                                | To examine factors associated with persistent frequent ED use during a 2-year period among Medicare beneficiaries                                                                                                                          | 5,400,237                    | Logistic regression<br>Wald test                                                             |
| 48 | 2016<br>United States              |                                                       |                                                                         |                                                                                                                                                                                                                                            |                              |                                                                                              |
| 51 | Colligan, E.M.<br><i>et al.</i>    | Medicare beneficiaries                                | $\geq 4$ visits per year                                                | To examine factors related to frequent ED use in a large, nationally representative sample of Medicare beneficiaries                                                                                                                       | 5,778,038                    | Chi-square test<br>Analysis of variance<br>Logistic regression<br>Wald test                  |
| 53 | 2017<br>United States              |                                                       |                                                                         |                                                                                                                                                                                                                                            |                              |                                                                                              |

|    |                             |               |                      |                              |         |                      |
|----|-----------------------------|---------------|----------------------|------------------------------|---------|----------------------|
| 1  |                             |               |                      |                              |         |                      |
| 2  |                             |               |                      |                              |         |                      |
| 3  |                             |               |                      |                              |         |                      |
| 4  |                             |               |                      |                              |         |                      |
| 5  | Cunningham, A.              |               |                      | To compare frequent and      |         |                      |
| 6  | <i>et al.</i>               |               |                      | infrequent ED visitors'      |         |                      |
| 7  |                             | All           | 95th percentile      | primary care utilization     | 1,113   | t-test               |
| 8  | 2017                        |               | $\geq 10$ visits per | and perceptions of primary   |         | Chi-square test      |
| 9  | United States               |               | year                 | care access, continuity, and |         | Logistic regression  |
| 10 |                             |               |                      | connectedness and to         |         |                      |
| 11 |                             |               |                      | examine primary care         |         |                      |
| 12 |                             |               |                      | utilization and perceptions  |         |                      |
| 13 |                             |               |                      | as predictors of ED use      |         |                      |
| 14 |                             |               |                      |                              |         | Wilcoxon rank-sum    |
| 15 | Das, L.T. <i>et al.</i>     |               |                      | To explore the               |         | test                 |
| 16 |                             | Children      | $\geq 2$ visits per  | predictability of frequent   | 2,691   | Chi-square test      |
| 17 | 2017                        | with asthma   | year                 | ED use among children        |         | LASSO logistic       |
| 18 | United States               |               |                      | with asthma using data       |         | regression           |
| 19 |                             |               |                      | from an EHR from one         |         | Regularized logistic |
| 20 |                             |               |                      | medical center               |         | regression           |
| 21 |                             |               |                      |                              |         | Decision trees       |
| 22 |                             |               |                      |                              |         | Random forests       |
| 23 |                             |               | 2-4 visits per       | To identify                  |         | Support vector       |
| 24 | Doran, K.M. <i>et al.</i>   |               | year                 | sociodemographic and         |         | machines             |
| 25 |                             | All           | 5-10 visits per      | clinical factors most        | 930,712 |                      |
| 26 | 2013                        |               | year                 | strongly associated with     |         | Logistic regression  |
| 27 | United States               |               | 11-25 visits per     | frequent ED use within the   |         |                      |
| 28 |                             |               | year                 | Veterans Health              |         |                      |
| 29 |                             |               | $\geq 25$ visits     | Administration nationally    |         |                      |
| 30 |                             |               |                      |                              |         |                      |
| 31 | Doran, K.M. <i>et al.</i>   |               |                      | To examine patients'         |         |                      |
| 32 |                             | All           | $\geq 3$ visits per  | reasons for using the ED     | 940     | Logistic regression  |
| 33 | 2014                        |               | year                 | for low-acuity health        |         |                      |
| 34 | United States               |               |                      | complaints, and determine    |         |                      |
| 35 |                             |               |                      | whether reasons differed     |         |                      |
| 36 |                             |               |                      | for frequent ED users        |         |                      |
| 37 |                             |               |                      | versus non-frequent ED       |         |                      |
| 38 |                             |               |                      | users                        |         |                      |
| 39 | Doupe, M.B.                 |               |                      | To identify factors that     | 105,687 | Logistic regression  |
| 40 | <i>et al.</i>               | All           | $\geq 7$ visits per  | define frequent and highly   |         | Receiver operating   |
| 41 | 2012                        |               | year                 | frequent ED users            |         | characteristic curve |
| 42 | Canada                      |               |                      |                              |         |                      |
| 43 | Fernandes, A.K.             |               |                      | To identify characteristics  |         |                      |
| 44 | <i>et al.</i>               | All           | $\geq 3$ visits per  | related to poor disease      | 86      | Chi-square test      |
| 45 | 2003                        |               | year                 | control and frequent visits  |         | Logistic regression  |
| 46 | Brazil                      |               |                      | to the ED to apply           |         |                      |
| 47 |                             |               |                      | appropriate clinical         |         |                      |
| 48 |                             |               |                      | management                   |         |                      |
| 49 | Flood, C. <i>et al.</i>     | Children      | $\geq 4$ visits per  | To identify factors          | 2,631   | Chi-square test      |
| 50 |                             |               | year                 | associated with high ED      |         | t-test               |
| 51 | 2017                        |               |                      | utilization among children   |         | Logistic regression  |
| 52 | United States               |               |                      | in vulnerable families       |         |                      |
| 53 |                             |               |                      |                              |         | Wilcoxon rank-sum    |
| 54 | Freitag, F.G. <i>et al.</i> | People with   | $\geq 3$ visits per  | To examine the               | 785     | test                 |
| 55 |                             | chronic daily | year                 | characteristics of chronic   |         | t-test               |
| 56 | 2005                        | headache      |                      | daily headache sufferers     |         | Chi-square test      |
| 57 | United States               |               |                      | who use EDs and identify     |         | Poisson regression   |
| 58 |                             |               |                      |                              |         |                      |
| 59 |                             |               |                      |                              |         |                      |
| 60 |                             |               |                      |                              |         |                      |

|                              |                                      |                              | factors predictive of ED visits                                                                                                                                                                                                                        |        | Negative binomial regression<br>Logistic regression                                                                                                                                                                                |
|------------------------------|--------------------------------------|------------------------------|--------------------------------------------------------------------------------------------------------------------------------------------------------------------------------------------------------------------------------------------------------|--------|------------------------------------------------------------------------------------------------------------------------------------------------------------------------------------------------------------------------------------|
| Friedman, B.W. <i>et al.</i> | People with severe headache          | $\geq 4$ visits per year     | To determine frequency of ED use and risk factors for use among patients suffering severe headache                                                                                                                                                     | 13,451 | Markov chain Monte Carlo imputation<br>Logistic regression                                                                                                                                                                         |
| 2009<br>United States        |                                      |                              |                                                                                                                                                                                                                                                        |        |                                                                                                                                                                                                                                    |
| Frost, D.W. <i>et al.</i>    | All                                  | $\geq 3$ visits per year     | To determine whether machine learning techniques using text from a family practice electronic medical record can be used to predict future high ED use and total costs by patients who are not yet high ED users or high cost to the healthcare system | 43,111 | Logistic regression                                                                                                                                                                                                                |
| 2017<br>Canada               |                                      |                              |                                                                                                                                                                                                                                                        |        |                                                                                                                                                                                                                                    |
| Girts, T.K. <i>et al.</i>    | People with a diagnosis of psychosis | $\geq 2$ visits per 6 months | To develop a predictive model of ED utilization for patients where a diagnosis of psychosis could be identified from a claim associated with a medical service provider visit                                                                          | 764    | t-test<br>Linear regression                                                                                                                                                                                                        |
| 2002<br>United States        |                                      |                              |                                                                                                                                                                                                                                                        |        |                                                                                                                                                                                                                                    |
| Grinspan, Z.M. <i>et al.</i> | People with epilepsy                 | $\geq 4$ visits per year     | To describe (1) the predictability of frequent ED use (a marker of inadequate disease control and/or poor access to care), and (2) the demographics, comorbidities, and use of health services of frequent ED users, among people with epilepsy        | 8,041  | Chi-square test<br>Logistic regression<br>Regularized logistic regression<br>Elastic net logistic regression<br>Decision trees<br>Random forests<br>AdaBoost<br>Support vector machines<br>Receiver operating characteristic curve |
| 2015<br>United States        |                                      |                              |                                                                                                                                                                                                                                                        |        |                                                                                                                                                                                                                                    |
| Gruneir, A. <i>et al.</i>    | Nursing home residents               | $\geq 3$ visits per year     | To describe repeat ED visits over one year, identify risk factors for repeat use, and characterize "frequent" ED visitors                                                                                                                              | 25,653 | Logistic regression<br>Andersen-Gill model                                                                                                                                                                                         |
| 2018<br>Canada               |                                      |                              |                                                                                                                                                                                                                                                        |        |                                                                                                                                                                                                                                    |
| Hardie, T.L. <i>et al.</i>   | All                                  | $\geq 4$ visits per year     | To describe frequent users of ED services in a rural community setting and the association between counts of patient's visits and discrete diagnoses                                                                                                   | 1,652  | Poisson regression                                                                                                                                                                                                                 |
| 2015<br>United States        |                                      |                              |                                                                                                                                                                                                                                                        |        |                                                                                                                                                                                                                                    |
| Hasegawa, K. <i>et al.</i>   | People with acute asthma             | $\geq 2$ visits per year     | To examine the proportion and patient characteristics of adult patients with multiple ED visits for                                                                                                                                                    | 86,224 | Chi-square test<br>Kruskal-Wallis test<br>Logistic regression                                                                                                                                                                      |
| 2014<br>United States        |                                      |                              |                                                                                                                                                                                                                                                        |        |                                                                                                                                                                                                                                    |

|                              |                                                   |                                         |                                                                                                                                                                                                                               |                                                  |                                                                                                                    |  |
|------------------------------|---------------------------------------------------|-----------------------------------------|-------------------------------------------------------------------------------------------------------------------------------------------------------------------------------------------------------------------------------|--------------------------------------------------|--------------------------------------------------------------------------------------------------------------------|--|
|                              |                                                   |                                         |                                                                                                                                                                                                                               | acute asthma and the associated hospital charges |                                                                                                                    |  |
| Hasegawa, K. <i>et al.</i>   | People with acute heart failure syndrome          | $\geq 2$ visits per year                | To examine the proportion and characteristics of patients with frequent ED visits for acute heart failure syndrome and associated healthcare utilization                                                                      | 113,033                                          | Chi-square test<br>Kruskal-Wallis test<br>Negative binomial regression<br>Linear regression                        |  |
| 2014<br>United States        |                                                   |                                         |                                                                                                                                                                                                                               |                                                  |                                                                                                                    |  |
| Hasegawa, K. <i>et al.</i>   | People with chronic obstructive pulmonary disease | $\geq 2$ visits per year                | To quantify the proportion and characteristics of patients with frequent ED visits for acute exacerbation of chronic obstructive pulmonary disease and associated healthcare utilization                                      | 98,280                                           | Chi-square test<br>Kruskal-Wallis test<br>Logistic regression<br>Negative binomial regression<br>Linear regression |  |
| 2014<br>United States        |                                                   |                                         |                                                                                                                                                                                                                               |                                                  |                                                                                                                    |  |
| Huang, J.A. <i>et al.</i>    | All                                               | $\geq 4$ visits per year                | To characterize frequent ED users and to identify the factors associated with frequent ED use in a hospital in Taiwan                                                                                                         | 800                                              | Chi-square test<br>Logistic regression                                                                             |  |
| 2003<br>Taiwan               |                                                   |                                         |                                                                                                                                                                                                                               |                                                  |                                                                                                                    |  |
| Hudon, C. <i>et al.</i>      | All                                               | $\geq 3$ visits per year                | To identify prospectively personal characteristics and experience of organizational and relational dimensions of primary care that predict frequent use of ED                                                                 | 1,769                                            | Mixed-effects logistic regression                                                                                  |  |
| 2016<br>Canada               |                                                   |                                         |                                                                                                                                                                                                                               |                                                  |                                                                                                                    |  |
| Hudon, C. <i>et al.</i>      | People with diabetes                              | $\geq 3$ visits for 3 consecutive years | To explore the factors associated with chronic frequent ED utilization in a population with diabetes                                                                                                                          | 62,316                                           | Logistic regression<br>Decision trees                                                                              |  |
| 2017<br>Canada               |                                                   |                                         |                                                                                                                                                                                                                               |                                                  |                                                                                                                    |  |
| Hunt, K.A. <i>et al.</i>     | All                                               | $\geq 4$ visits per year                | To identify frequent users of the ED and determine the characteristics of these patients                                                                                                                                      | 49,603                                           | Logistic regression                                                                                                |  |
| 2006<br>United States        |                                                   |                                         |                                                                                                                                                                                                                               |                                                  |                                                                                                                    |  |
| Huynh, C. <i>et al.</i>      | People with substance use disorders               | $\geq 4$ visits per year                | To assess the characteristics of individuals with substance use disorders according to their frequency of ED utilization, and to examine which variables were associated with an increase in ED visits using Andersen's model | 4,526                                            | Chi-square test<br>Analysis of variance<br>Negative binomial regression<br>Generalized estimating equations        |  |
| 2016<br>Canada               |                                                   |                                         |                                                                                                                                                                                                                               |                                                  |                                                                                                                    |  |
| Kanzaria, H.K. <i>et al.</i> | Adults aged 18-55 years                           | $\geq 4$ visits per year                | To examine the persistence of frequent ED use over an eleven-year period, describe characteristics of persistent versus non-persistent frequent ED users, and identify                                                        | 173,273                                          | Logistic regression                                                                                                |  |
| 2017<br>United States        |                                                   |                                         |                                                                                                                                                                                                                               |                                                  |                                                                                                                    |  |

|                           |                                                                        |                                         |  |                                                                                                                                                                                 |         |                                                                               |
|---------------------------|------------------------------------------------------------------------|-----------------------------------------|--|---------------------------------------------------------------------------------------------------------------------------------------------------------------------------------|---------|-------------------------------------------------------------------------------|
|                           |                                                                        |                                         |  | predictors of persistent frequent ED use                                                                                                                                        |         |                                                                               |
| Kerr, T. <i>et al.</i>    | Injection drug users                                                   | $\geq 3$ visits during the 2 past years |  | To examine rates of primary care and emergency room use among injection drug users and to identify correlates of frequent emergency department use                              | 883     | Chi-square test<br>Wilcoxon signed-rank test<br>t-test<br>Logistic regression |
| Kidane, B. <i>et al.</i>  | Patients who received oesophagectomy                                   | $\geq 3$ visits per year                |  | To evaluate healthcare resource utilization, specifically ED visits within 1 year of oesophagectomy, and to identify risk factors for ED visits and frequent ED use             | 3,344   | t-test<br>Wilcoxon rank-sum test<br>Fisher exact tests<br>Logistic regression |
| Kim, J.J. <i>et al.</i>   | All                                                                    | 99th percentile                         |  | To describe patient and visit characteristics for Canadian ED highly frequent users and patient subgroups with mental illness, substance misuse, or $\geq 30$ yearly ED visits. | 261     | t-test<br>Wilcoxon rank-sum test                                              |
| Kirby, S.E. <i>et al.</i> | People with chronic disease                                            | $\geq 3$ visits per year                |  | To explore the link between frequent readmissions in chronic disease and patient-related factors                                                                                | 15,806  | Chi-square test<br>Logistic regression                                        |
| Kirby, S.E. <i>et al.</i> | All                                                                    | $\geq 4$ visits per year                |  | To identify the factors associated with frequent re-attendances in a regional hospital thereby highlighting possible solutions to the problem                                   | 15,806  | Kruskal-Wallis test<br>Chi-square test<br>Logistic regression                 |
| Klein, LR. <i>et al.</i>  | Adults who present to the ED repeatedly for acute alcohol intoxication | $\geq 20$ visits per year               |  | To describe frequent ED users who present to the ED repeatedly for acute alcohol intoxication and their ED encounters                                                           | 325     | Difference in proportions test                                                |
| Ko, M. <i>et al.</i>      | All                                                                    | $\geq 4$ visits per year                |  | To describe the distribution of the frequency of ED visits among ED users in 2010 and to evaluate the association of frequent ED use with various patient characteristics       | 170,457 | Logistic regression                                                           |
| Ledoux, Y. & Minner, P.   | Psychiatric                                                            | $\geq 4$ visits per year                |  | (1) To provide a naturalistic evaluation of patients repeating admissions in a psychiatric emergency ward (distinguishing between                                               | 2,470   | Mantel-Haenszel test<br>Analysis of variance<br>Logistic regression           |

|                                                        |                                           |                                               |                                                                                                                                                                                                                                                                     |                                                                                                                                                                                               |                                                                         |
|--------------------------------------------------------|-------------------------------------------|-----------------------------------------------|---------------------------------------------------------------------------------------------------------------------------------------------------------------------------------------------------------------------------------------------------------------------|-----------------------------------------------------------------------------------------------------------------------------------------------------------------------------------------------|-------------------------------------------------------------------------|
|                                                        |                                           |                                               |                                                                                                                                                                                                                                                                     | occasional repeaters and frequent repeaters), (2) to identify patients' characteristics that predict repeated use of a psychiatric emergency room and (3) to propose adapted treatment models |                                                                         |
| Lee, J. <i>et al.</i><br>2018<br>United States         | Persons with systemic lupus erythematosus | $\geq 3$ visits per year                      | To identify lupus erythematosus patients who persistently frequented the ED over four years                                                                                                                                                                         | 129                                                                                                                                                                                           | t-test<br>Chi-square test<br>Fisher exact test<br>Logistic regression   |
| Legramante, J.M. <i>et al.</i><br>2016<br>Italy        | All                                       | $\geq 4$ visits per year                      | To evaluate and characterize hospital visits of older patients (age 65 or greater) to the ED of a university teaching hospital in Rome, in order to identify clinical and social characteristics potentially associated with "elderly frequent users"               | 38,016                                                                                                                                                                                        | t-test<br>Logistic regression                                           |
| Leporatti, L. <i>et al.</i><br>2016<br>Italy           | All                                       | 90th percentile $\geq 3$ visits per year      | To describe the characteristics of patients who frequently accessed accident and emergency departments located in the metropolitan area of Genoa                                                                                                                    | 147,864                                                                                                                                                                                       | Zero-truncated negative binomial regression<br>Logistic regression      |
| Lim, S.F. <i>et al.</i><br>2014<br>Singapore           | People with asthma                        | $\geq 4$ visits per year                      | To describe the characteristics of frequent attenders who present themselves multiple times to the ED for asthma exacerbations                                                                                                                                      | 155                                                                                                                                                                                           | t-test<br>Chi-square test<br>Mann-Whitney U test<br>Logistic regression |
| Limsrivilai, J. <i>et al.</i><br>2017<br>United States | People with inflammatory bowel diseases   | 75th percentile of the annual medical charges | To identify predictive factors readily available in a standard electronic medical record to develop a multivariate model to predict the probability of inflammatory bowel diseases-related hospitalization, ED visit, and high total charges in the subsequent year | 1,430                                                                                                                                                                                         | Receiver operating characteristic curve<br>Logistic regression          |
| Lin, W.C. <i>et al.</i><br>2015<br>United States       | Homeless people                           | $\geq 3$ visits per year                      | To examine factors associated with frequent hospitalizations and ED visits among Medicaid members who were homeless                                                                                                                                                 | 6,494                                                                                                                                                                                         | Chi-square test<br>Analysis of variance<br>Negative binomial regression |
| Liu, S.W. <i>et al.</i><br>2013                        | People with mental health,                | $\geq 4$ visits per year                      | To determine whether frequent ED users are more likely to make at                                                                                                                                                                                                   | 65,201                                                                                                                                                                                        | t-test<br>Chi-square test<br>Logistic regression                        |

|                                                         |                                             |                          |  |                                                                                                                                                                                 |        |                                                              |
|---------------------------------------------------------|---------------------------------------------|--------------------------|--|---------------------------------------------------------------------------------------------------------------------------------------------------------------------------------|--------|--------------------------------------------------------------|
| United States                                           | alcohol or drug-related diagnoses           |                          |  | least one and a majority of visits for mental health, alcohol, or drug-related complaints compared to non-frequent users                                                        |        |                                                              |
| Mandelberg, J.H. <i>et al.</i><br>2000<br>United States | All                                         | $\geq 5$ visits per year |  | To determine how the demographic, clinical, and utilization characteristics of frequent ED users differ from those of other ED patients                                         | 43,383 | Logistic regression<br>Survival analysis                     |
| Mann, E.G. <i>et al.</i><br>2016<br>Canada              | People with chronic pain                    | 90th percentile          |  | To investigate the role of chronic pain in healthcare visits and to document the frequency of healthcare visits and to identify characteristics associated with frequent visits | 1,274  | Logistic regression                                          |
| Mann, E.G. <i>et al.</i><br>2017<br>Canada              | People with chronic pain                    | 90th percentile          |  | To describe factors associated with high clinic and emergency room use among individuals with chronic pain                                                                      | 702    | t-test<br>Logistic regression                                |
| McMahon, C.G. <i>et al.</i><br>2016<br>Ireland          | All                                         | $\geq 4$ visits per year |  | To examine the characteristics of the frequent ED attenders by age (under 65 and over 65 years)                                                                                 | 19,310 | Chi-square test<br>Logistic regression                       |
| Meyer, J.P. <i>et al.</i><br>2013<br>United States      | Prisoners with Human Immunodeficiency Virus | $\geq 2$ visits per year |  | To characterize the medical, social, and psychiatric correlates of frequent ED use among released prisoners with human immunodeficiency virus                                   | 151    | t-test<br>Chi-square test<br>Poisson regression              |
| Milani, S.A. <i>et al.</i><br>2016<br>United States     | People with multimorbid chronic diseases    | $\geq 4$ visits per year |  | To examine the association between multimorbid chronic disease and frequency ED visits in the past 6 months, by sex, in a community sample of adults from northern Florida      | 7,143  | Breslow-Day test<br>Logistic regression                      |
| Milbrett, P. & Halm, M.<br>2009<br>United States        | All                                         | $\geq 6$ visits per year |  | To describe the characteristics of patients who frequently use ED services and to determine factors most predictive of frequent ED use                                          | 201    | Chi-square test<br>Mann-Whitney U test<br>Poisson regression |
| Moe, J. <i>et al.</i><br>2013<br>Canada                 | All                                         | 95th percentile          |  | To develop uniform definitions, quantify ED burden, and characterize adult frequent users of a suburban community ED                                                            | 14,223 | Chi-square test<br>Mann-Whitney U test                       |



|    |                                   |                                                                                   |                                          |                                                                                                                                                                                                                                                 |           |                                                                                                                  |
|----|-----------------------------------|-----------------------------------------------------------------------------------|------------------------------------------|-------------------------------------------------------------------------------------------------------------------------------------------------------------------------------------------------------------------------------------------------|-----------|------------------------------------------------------------------------------------------------------------------|
| 1  |                                   |                                                                                   |                                          |                                                                                                                                                                                                                                                 |           |                                                                                                                  |
| 2  |                                   |                                                                                   |                                          |                                                                                                                                                                                                                                                 |           |                                                                                                                  |
| 3  |                                   |                                                                                   |                                          |                                                                                                                                                                                                                                                 |           |                                                                                                                  |
| 4  |                                   |                                                                                   |                                          |                                                                                                                                                                                                                                                 |           |                                                                                                                  |
| 5  | Mueller, E.L.<br><i>et al.</i>    | Children<br>with cancer                                                           | 90th percentile<br>≥4 visits per<br>year | To (a) evaluate patient and<br>ED encounter<br>characteristics of frequent<br>ED utilizers among<br>children with cancer and<br>(b) quantify healthcare<br>services for frequent ED<br>utilizers                                                | 17,943    | Chi-square test<br>Logistic regression                                                                           |
| 6  | 2016                              |                                                                                   |                                          |                                                                                                                                                                                                                                                 |           |                                                                                                                  |
| 7  | United States                     |                                                                                   |                                          |                                                                                                                                                                                                                                                 |           |                                                                                                                  |
| 8  |                                   |                                                                                   |                                          |                                                                                                                                                                                                                                                 |           |                                                                                                                  |
| 9  |                                   |                                                                                   |                                          |                                                                                                                                                                                                                                                 |           |                                                                                                                  |
| 10 |                                   |                                                                                   |                                          |                                                                                                                                                                                                                                                 |           |                                                                                                                  |
| 11 |                                   |                                                                                   |                                          |                                                                                                                                                                                                                                                 |           |                                                                                                                  |
| 12 | Nambiar, D. <i>et al.</i>         | Adults who<br>inject drugs                                                        | ≥3 visits per<br>year                    | To describe demographic<br>factors, patterns of<br>substance use and previous<br>health service use<br>associated with frequent<br>use of EDs in people who<br>inject drugs                                                                     | 612       | Negative binomial<br>regression<br>Logistic regression                                                           |
| 13 | 2017                              |                                                                                   |                                          |                                                                                                                                                                                                                                                 |           |                                                                                                                  |
| 14 | Australia                         |                                                                                   |                                          |                                                                                                                                                                                                                                                 |           |                                                                                                                  |
| 15 |                                   |                                                                                   |                                          |                                                                                                                                                                                                                                                 |           |                                                                                                                  |
| 16 |                                   |                                                                                   |                                          |                                                                                                                                                                                                                                                 |           |                                                                                                                  |
| 17 |                                   |                                                                                   |                                          |                                                                                                                                                                                                                                                 |           |                                                                                                                  |
| 18 |                                   |                                                                                   |                                          |                                                                                                                                                                                                                                                 |           |                                                                                                                  |
| 19 |                                   |                                                                                   |                                          |                                                                                                                                                                                                                                                 |           |                                                                                                                  |
| 20 | Nambiar, D. <i>et al.</i>         | Adults who<br>inject drugs                                                        | ≥3 visits per<br>year                    | To describe characteristics<br>of state-wide ED<br>presentations in a cohort of<br>people who inject drugs,<br>compare presentation rates<br>to the general population,<br>and to examine<br>characteristics associated<br>with frequent ED use | 678       | Negative-binomial<br>regression<br>Generalized estimating<br>equations                                           |
| 21 | 2018                              |                                                                                   |                                          |                                                                                                                                                                                                                                                 |           |                                                                                                                  |
| 22 | Australia                         |                                                                                   |                                          |                                                                                                                                                                                                                                                 |           |                                                                                                                  |
| 23 |                                   |                                                                                   |                                          |                                                                                                                                                                                                                                                 |           |                                                                                                                  |
| 24 |                                   |                                                                                   |                                          |                                                                                                                                                                                                                                                 |           |                                                                                                                  |
| 25 |                                   |                                                                                   |                                          |                                                                                                                                                                                                                                                 |           |                                                                                                                  |
| 26 |                                   |                                                                                   |                                          |                                                                                                                                                                                                                                                 |           |                                                                                                                  |
| 27 |                                   |                                                                                   |                                          |                                                                                                                                                                                                                                                 |           |                                                                                                                  |
| 28 | Naseer, M. <i>et al.</i>          | Older adults                                                                      | ≥4 visits during<br>a 4 year-period      | To assess the association<br>of health related quality of<br>life with time to first ED<br>visit and/or frequent ED<br>use in older adults during<br>four-year period and if this<br>association differs in 66-80<br>and 80+ age groups         | 673       | Cox proportional<br>hazard model<br>Logistic regression                                                          |
| 29 | 2018                              |                                                                                   |                                          |                                                                                                                                                                                                                                                 |           |                                                                                                                  |
| 30 | Sweden                            |                                                                                   |                                          |                                                                                                                                                                                                                                                 |           |                                                                                                                  |
| 31 |                                   |                                                                                   |                                          |                                                                                                                                                                                                                                                 |           |                                                                                                                  |
| 32 |                                   |                                                                                   |                                          |                                                                                                                                                                                                                                                 |           |                                                                                                                  |
| 33 |                                   |                                                                                   |                                          |                                                                                                                                                                                                                                                 |           |                                                                                                                  |
| 34 |                                   |                                                                                   |                                          |                                                                                                                                                                                                                                                 |           |                                                                                                                  |
| 35 | Neufeld, E. <i>et al.</i>         | All                                                                               | ≥4 visits per<br>year                    | To describe factors<br>predicting frequent ED use<br>among rural older adults<br>receiving home care<br>services in Ontario,<br>Canada                                                                                                          | 12,118    | Chi-square test<br>Logistic regression                                                                           |
| 36 | 2016                              |                                                                                   |                                          |                                                                                                                                                                                                                                                 |           |                                                                                                                  |
| 37 | Canada                            |                                                                                   |                                          |                                                                                                                                                                                                                                                 |           |                                                                                                                  |
| 38 |                                   |                                                                                   |                                          |                                                                                                                                                                                                                                                 |           |                                                                                                                  |
| 39 |                                   |                                                                                   |                                          |                                                                                                                                                                                                                                                 |           |                                                                                                                  |
| 40 | Neuman, M.I.<br><i>et al.</i>     | All                                                                               | ≥4 visits per<br>year                    | To compare the<br>characteristics and ED<br>health services of children<br>by their ED visit frequency                                                                                                                                          | 1,896,547 | Mantel-Haenszel test<br>Receiver operating<br>characteristic curve<br>Generalized linear<br>mixed-effects models |
| 41 | 2014                              |                                                                                   |                                          |                                                                                                                                                                                                                                                 |           |                                                                                                                  |
| 42 | United States                     |                                                                                   |                                          |                                                                                                                                                                                                                                                 |           |                                                                                                                  |
| 43 |                                   |                                                                                   |                                          |                                                                                                                                                                                                                                                 |           |                                                                                                                  |
| 44 |                                   |                                                                                   |                                          |                                                                                                                                                                                                                                                 |           |                                                                                                                  |
| 45 | Ngamini-Ngui, A.<br><i>et al.</i> | Patients with<br>schizophrenia and a<br>co-occurring<br>substance<br>use disorder | ≥5 visits per<br>year                    | To assess factors<br>associated over time with<br>high use of EDs by Quebec<br>patients who had<br>schizophrenia and a<br>co-occurring substance use<br>disorder                                                                                | 2,921     | Generalized estimating<br>equations                                                                              |
| 46 | 2014                              |                                                                                   |                                          |                                                                                                                                                                                                                                                 |           |                                                                                                                  |
| 47 | Canada                            |                                                                                   |                                          |                                                                                                                                                                                                                                                 |           |                                                                                                                  |
| 48 |                                   |                                                                                   |                                          |                                                                                                                                                                                                                                                 |           |                                                                                                                  |
| 49 |                                   |                                                                                   |                                          |                                                                                                                                                                                                                                                 |           |                                                                                                                  |
| 50 |                                   |                                                                                   |                                          |                                                                                                                                                                                                                                                 |           |                                                                                                                  |
| 51 |                                   |                                                                                   |                                          |                                                                                                                                                                                                                                                 |           |                                                                                                                  |
| 52 | Norman, C. <i>et al.</i>          | All                                                                               | ≥4 visits per<br>year                    | To clearly define and<br>describe characteristics of<br>frequent emergency<br>medical services users in<br>order to provide                                                                                                                     | 539       | Logistic regression                                                                                              |
| 53 | 2016                              |                                                                                   |                                          |                                                                                                                                                                                                                                                 |           |                                                                                                                  |
| 54 | United States                     |                                                                                   |                                          |                                                                                                                                                                                                                                                 |           |                                                                                                                  |
| 55 |                                   |                                                                                   |                                          |                                                                                                                                                                                                                                                 |           |                                                                                                                  |
| 56 |                                   |                                                                                   |                                          |                                                                                                                                                                                                                                                 |           |                                                                                                                  |
| 57 |                                   |                                                                                   |                                          |                                                                                                                                                                                                                                                 |           |                                                                                                                  |
| 58 |                                   |                                                                                   |                                          |                                                                                                                                                                                                                                                 |           |                                                                                                                  |
| 59 |                                   |                                                                                   |                                          |                                                                                                                                                                                                                                                 |           |                                                                                                                  |
| 60 |                                   |                                                                                   |                                          |                                                                                                                                                                                                                                                 |           |                                                                                                                  |

|                             |                                          |                                                                                                  |  |                                                                                                                                                            |           |                                                                     |
|-----------------------------|------------------------------------------|--------------------------------------------------------------------------------------------------|--|------------------------------------------------------------------------------------------------------------------------------------------------------------|-----------|---------------------------------------------------------------------|
|                             |                                          |                                                                                                  |  | suggestions for efficient and cost-effective interventions that address the healthcare needs of these users                                                |           |                                                                     |
| O'Toole, T.P. <i>et al.</i> | Substance users                          | $\geq 3$ visits per year                                                                         |  | To identify factors associated with 12-month high frequency utilization of ambulatory care, ED, and inpatient medical care in a substance-using population | 326       | t-test<br>Chi-square test<br>Logistic regression                    |
| 2007<br>United States       |                                          |                                                                                                  |  |                                                                                                                                                            |           |                                                                     |
| Palmer, E. <i>et al.</i>    | All                                      | $\geq 4$ visits per year                                                                         |  | To determine if having a primary care provider is an important factor in frequency of ED use                                                               | 59,803    | Chi-square test<br>Wilcoxon rank-sum test<br>Logistic regression    |
| 2014<br>Canada              |                                          |                                                                                                  |  |                                                                                                                                                            |           |                                                                     |
| Panopolis, P. <i>et al.</i> | People with systemic lupus erythematosus | $\geq 3$ visits per year                                                                         |  | To describe characteristics of systemic lupus erythematosus patients who are frequent users of the ED and to identify predictors of frequent ED use        | 807       | One-way analysis of variance<br>Logistic regression                 |
| 2010<br>United States       |                                          |                                                                                                  |  |                                                                                                                                                            |           |                                                                     |
| Pasic, J. <i>et al.</i>     | Psychiatric                              | 2 SD above the mean number of visits<br>$\geq 6$ visits per year<br>$\geq 4$ visits in a quarter |  | To examine the sociodemographic and clinical characteristics of high utilizers of psychiatric emergency services                                           | 17,481    | Chi-square test<br>Logistic regression                              |
| 2005<br>United States       |                                          |                                                                                                  |  |                                                                                                                                                            |           |                                                                     |
| Paul, P. <i>et al.</i>      | All                                      | $\geq 5$ visits per year                                                                         |  | To determine factors associated with frequent ED attendance at an acute general hospital in Singapore.                                                     | 82,172    | Chi-square test<br>Logistic regression                              |
| 2010<br>Singapore           |                                          |                                                                                                  |  |                                                                                                                                                            |           |                                                                     |
| Peltz, A. <i>et al.</i>     | Medicaid-insured children                | $\geq 4$ visits per year                                                                         |  | To describe the characteristics of children who sustain high-frequency ED use over the following 2 years                                                   | 470,449   | Chi-square test<br>Wilcoxon signed-rank test<br>Logistic regression |
| 2017<br>United States       |                                          |                                                                                                  |  |                                                                                                                                                            |           |                                                                     |
| Pereira, M. <i>et al.</i>   | All                                      | $\geq 5$ visits per year                                                                         |  | To develop machine learning models that can predict future ED utilization of individual patients, using only information from the present and the past     | 4,604,252 | Decision trees<br>AdaBoost<br>Logistic regression                   |
| 2016<br>United States       |                                          |                                                                                                  |  |                                                                                                                                                            |           |                                                                     |
| Pines, J.M. & Buford, K.    | People with asthma                       | 90th percentile<br>$\geq 3$ visits per year                                                      |  | To determine socioeconomic and demographic factors that predict frequent ED use among asthmatics in southeastern Pennsylvania                              | 1,799     | t-test<br>Chi-square test<br>Logistic regression                    |
| 2006<br>United States       |                                          |                                                                                                  |  |                                                                                                                                                            |           |                                                                     |
| Quilty, S. <i>et al.</i>    | People without                           | $\geq 6$ visits per year                                                                         |  | To determine the clinical and environmental                                                                                                                | 273       | t-test<br>Chi-square test                                           |
|                             |                                          |                                                                                                  |  |                                                                                                                                                            |           |                                                                     |

|                                                            |                                   |                              |  |                                                                                                                                                                                                                                                                                |                              |                                                                                                                                                           |
|------------------------------------------------------------|-----------------------------------|------------------------------|--|--------------------------------------------------------------------------------------------------------------------------------------------------------------------------------------------------------------------------------------------------------------------------------|------------------------------|-----------------------------------------------------------------------------------------------------------------------------------------------------------|
| 2016<br>Australia                                          | chronic<br>health<br>conditions   |                              |  | variables associated with frequent presentations by adult patients to a remote Australian hospital ED for reasons other than chronic health conditions                                                                                                                         |                              | Fisher exact tests<br>Logistic regression                                                                                                                 |
| Rask, K.J. <i>et al.</i><br>1998<br>United States          | All                               | $\geq 10$ visits per 2 years |  | To describe primary care clinic use and emergency ED use for a cohort of public hospital patients seen in the ED, identify predictors of frequent ED use, and ascertain the clinical diagnoses of those with high rates of ED use                                              | 351                          | Chi-square test<br>t-test<br>Logistic regression                                                                                                          |
| Rauch, J. <i>et al.</i><br>2017<br>Germany                 | All                               | $\geq 3$ visits per year     |  | To examine (1) what ambulatory care sensitive conditions are linked to frequent use, (2) how frequent users can be clustered into subgroups with respect to their diagnoses, acuity and admittance, and (3) whether frequent use is related to higher acuity or admission rate | 23,364                       | Chi-square test<br>t-test<br>Linear regression<br>Non-negative matrix factorization                                                                       |
| Sacamo, P. <i>et al.</i><br>2018<br>United States          | Persons with substance use        | $\geq 2$ visits per 6 months |  | To examine associations of individuals and their social networks with high frequency ED use among persons reporting substance use                                                                                                                                              | 653                          | Poisson regression                                                                                                                                        |
| Samuels-Kalow, M.E. <i>et al.</i><br>2017<br>United States | All                               | $\geq 4$ visits per year     |  | To derive and test a predictive model for high frequency (4 or more visits per year), low-acuity (emergency severity index 4 or 5) utilization of the pediatric ED                                                                                                             | 60,799<br>(number of visits) | Likelihood ratio test<br>Chi-square test<br>Receiver operating characteristic curve<br>Logistic regression                                                |
| Samuels-Kalow, M.E. <i>et al.</i><br>2018<br>United States | Patients with asthma exacerbation | $\geq 4$ visits per year     |  | To create a predictive model to prospectively identify patients at risk of high-frequency ED utilization for asthma and to examine how that model differed using state wide versus single-center data                                                                          | 254,132                      | Chi-square test<br>Fisher exact tests<br>Wilcoxon rank-sum test<br>Hosmer-Lemeshow test<br>Receiver operating characteristic curve<br>Logistic regression |
| Samuels-Kalow, M.E. <i>et al.</i><br>2018<br>United States | Children                          | $\geq 3$ visits per year     |  | To develop a population-based model for predicting Medicaid-insured children at risk for high frequency of low-resource-intensity ED visits                                                                                                                                    | 743,016                      | Chi-square test<br>Receiver operating characteristic curve<br>Logistic regression                                                                         |

|    |                               |                                                   |                                         |                                                                                                                                                                                                                                          |         |                                                                                                      |
|----|-------------------------------|---------------------------------------------------|-----------------------------------------|------------------------------------------------------------------------------------------------------------------------------------------------------------------------------------------------------------------------------------------|---------|------------------------------------------------------------------------------------------------------|
| 1  |                               |                                                   |                                         |                                                                                                                                                                                                                                          |         |                                                                                                      |
| 2  |                               |                                                   |                                         |                                                                                                                                                                                                                                          |         |                                                                                                      |
| 3  |                               |                                                   |                                         |                                                                                                                                                                                                                                          |         |                                                                                                      |
| 4  |                               |                                                   |                                         |                                                                                                                                                                                                                                          |         |                                                                                                      |
| 5  | Schlichting, L.E.             | Children                                          | $\geq 2$ visits per year                | To examine the utilization of the ED by children with different forms of insurance and describe factors associated with repeat ED use and high reliance on the ED in a nationally representative sample of children in the United States | 47,926  | Logistic regression                                                                                  |
| 6  | <i>et al.</i>                 |                                                   |                                         |                                                                                                                                                                                                                                          |         |                                                                                                      |
| 7  | 2018                          |                                                   |                                         |                                                                                                                                                                                                                                          |         |                                                                                                      |
| 8  | United States                 |                                                   |                                         |                                                                                                                                                                                                                                          |         |                                                                                                      |
| 9  |                               |                                                   |                                         |                                                                                                                                                                                                                                          |         |                                                                                                      |
| 10 |                               |                                                   |                                         |                                                                                                                                                                                                                                          |         |                                                                                                      |
| 11 |                               |                                                   |                                         |                                                                                                                                                                                                                                          |         |                                                                                                      |
| 12 |                               |                                                   |                                         |                                                                                                                                                                                                                                          |         |                                                                                                      |
| 13 | Schmoll, S. <i>et al.</i>     | Psychiatric                                       | $\geq 9$ visits during the 6 past years | To describe demographic and clinical characteristics of frequent visitors to a psychiatric emergency ward in a French Academic hospital over 6 years in comparison to non-frequent visitors                                              | 8,800   | t-test<br>Chi-square test<br>Logistic regression                                                     |
| 14 | 2015                          |                                                   |                                         |                                                                                                                                                                                                                                          |         |                                                                                                      |
| 15 | France                        |                                                   |                                         |                                                                                                                                                                                                                                          |         |                                                                                                      |
| 16 |                               |                                                   |                                         |                                                                                                                                                                                                                                          |         |                                                                                                      |
| 17 |                               |                                                   |                                         |                                                                                                                                                                                                                                          |         |                                                                                                      |
| 18 |                               |                                                   |                                         |                                                                                                                                                                                                                                          |         |                                                                                                      |
| 19 |                               |                                                   |                                         |                                                                                                                                                                                                                                          |         |                                                                                                      |
| 20 |                               |                                                   |                                         |                                                                                                                                                                                                                                          |         |                                                                                                      |
| 21 | Soler, J.J. <i>et al.</i>     | People with chronic obstructive pulmonary disease | $\geq 3$ visits per year                | To identify factors associated with frequent use of hospital services (emergency care and admissions) in patients with chronic obstructive pulmonary disease                                                                             | 64      | t-test<br>Chi-square test<br>Kolmogorov-Smirnov test<br>Mann-Whitney U test<br>Logistic regression   |
| 22 | 2004                          |                                                   |                                         |                                                                                                                                                                                                                                          |         |                                                                                                      |
| 23 | Spain                         |                                                   |                                         |                                                                                                                                                                                                                                          |         |                                                                                                      |
| 24 |                               |                                                   |                                         |                                                                                                                                                                                                                                          |         |                                                                                                      |
| 25 |                               |                                                   |                                         |                                                                                                                                                                                                                                          |         |                                                                                                      |
| 26 |                               |                                                   |                                         |                                                                                                                                                                                                                                          |         |                                                                                                      |
| 27 |                               |                                                   |                                         |                                                                                                                                                                                                                                          |         |                                                                                                      |
| 28 | Street, M. <i>et al.</i>      | Adults aged $\geq 65$ years                       | $\geq 4$ visits per year                | To characterise older people who frequently use ED and compare patient outcomes with older non-frequent ED attenders                                                                                                                     | 21,073  | Chi-square test<br>Wilcoxon rank-sum test<br>Ordinal regression                                      |
| 29 | 2018                          |                                                   |                                         |                                                                                                                                                                                                                                          |         |                                                                                                      |
| 30 | Australia                     |                                                   |                                         |                                                                                                                                                                                                                                          |         |                                                                                                      |
| 31 |                               |                                                   |                                         |                                                                                                                                                                                                                                          |         |                                                                                                      |
| 32 |                               |                                                   |                                         |                                                                                                                                                                                                                                          |         |                                                                                                      |
| 33 | Sun, B.C. <i>et al.</i>       | All                                               | $\geq 4$ visits per year                | To identify predictors and outcomes associated with frequent ED users                                                                                                                                                                    | 2,333   | Likelihood ratio test<br>Chi-square test<br>Hosmer-Lemeshow test<br>Logistic regression<br>Bootstrap |
| 34 | 2003                          |                                                   |                                         |                                                                                                                                                                                                                                          |         |                                                                                                      |
| 35 | United States                 |                                                   |                                         |                                                                                                                                                                                                                                          |         |                                                                                                      |
| 36 |                               |                                                   |                                         |                                                                                                                                                                                                                                          |         |                                                                                                      |
| 37 |                               |                                                   |                                         |                                                                                                                                                                                                                                          |         |                                                                                                      |
| 38 | Supat, B. <i>et al.</i>       | Children                                          | $\geq 6$ visits per year                | To assess pediatric ED utilization in California and to describe those identified as frequent ED users                                                                                                                                   | 690,130 | Logistic regression                                                                                  |
| 39 | 2018                          |                                                   |                                         |                                                                                                                                                                                                                                          |         |                                                                                                      |
| 40 | United States                 |                                                   |                                         |                                                                                                                                                                                                                                          |         |                                                                                                      |
| 41 |                               |                                                   |                                         |                                                                                                                                                                                                                                          |         |                                                                                                      |
| 42 | Tangherlini, N. <i>et al.</i> | All                                               | $\geq 4$ visits per year                | To identify the factors that lead to increased use of emergency medical services (EMS) by patients $\geq 65$ years of age in an urban EMS system                                                                                         | 10,918  | Kruskal-Wallis test<br>Chi-square test<br>Logistic regression                                        |
| 43 | 2010                          |                                                   |                                         |                                                                                                                                                                                                                                          |         |                                                                                                      |
| 44 | United States                 |                                                   |                                         |                                                                                                                                                                                                                                          |         |                                                                                                      |
| 45 |                               |                                                   |                                         |                                                                                                                                                                                                                                          |         |                                                                                                      |
| 46 |                               |                                                   |                                         |                                                                                                                                                                                                                                          |         |                                                                                                      |
| 47 |                               |                                                   |                                         |                                                                                                                                                                                                                                          |         |                                                                                                      |
| 48 | Thakarar, K. <i>et al.</i>    | Homeless                                          | $\geq 2$ visits per year                | To identify risk factors for frequent emergency room (ER) visits and to examine the effects of housing status and HIV serostatus on ER utilization                                                                                       | 412     | Chi-square test<br>Logistic regression                                                               |
| 49 | 2015                          |                                                   |                                         |                                                                                                                                                                                                                                          |         |                                                                                                      |
| 50 | United States                 |                                                   |                                         |                                                                                                                                                                                                                                          |         |                                                                                                      |
| 51 |                               |                                                   |                                         |                                                                                                                                                                                                                                          |         |                                                                                                      |
| 52 |                               |                                                   |                                         |                                                                                                                                                                                                                                          |         |                                                                                                      |
| 53 | Vandyk, A.D. <i>et al.</i>    | Mental health                                     | $\geq 5$ visits per year                | To explore the population profile and associated socio demographic,                                                                                                                                                                      | 536     | Hosmer-Lemeshow test<br>Logistic regression                                                          |
| 54 |                               |                                                   |                                         |                                                                                                                                                                                                                                          |         |                                                                                                      |
| 55 |                               |                                                   |                                         |                                                                                                                                                                                                                                          |         |                                                                                                      |
| 56 |                               |                                                   |                                         |                                                                                                                                                                                                                                          |         |                                                                                                      |
| 57 |                               |                                                   |                                         |                                                                                                                                                                                                                                          |         |                                                                                                      |
| 58 |                               |                                                   |                                         |                                                                                                                                                                                                                                          |         |                                                                                                      |
| 59 |                               |                                                   |                                         |                                                                                                                                                                                                                                          |         |                                                                                                      |
| 60 |                               |                                                   |                                         |                                                                                                                                                                                                                                          |         |                                                                                                      |

|                                                      |                                    |                               |  |                                                                                                                                                                                                                                                                                                                                                |         |                                                                                                                               |
|------------------------------------------------------|------------------------------------|-------------------------------|--|------------------------------------------------------------------------------------------------------------------------------------------------------------------------------------------------------------------------------------------------------------------------------------------------------------------------------------------------|---------|-------------------------------------------------------------------------------------------------------------------------------|
| 2014<br>Canada                                       |                                    |                               |  | clinical, and service use factors of individuals who make frequent visits (5+annually) to hospital EDs for mental health complaints                                                                                                                                                                                                            |         |                                                                                                                               |
| Vinton, V.T. <i>et al.</i><br>2014<br>United States  | Chronic diseases and mental health | $\geq 4$ visits per year      |  | To compare the characteristics of US adults by frequency of ED utilization, specifically the prevalence of chronic diseases and outpatient primary care and mental health utilization                                                                                                                                                          | 157,818 | Logistic regression                                                                                                           |
| Vu, F. <i>et al.</i><br>2015<br>Switzerland          | Mental health and substance users  | $\geq 4$ visits per year      |  | To determine the proportions of psychiatric and substance use disorders suffered by EDs' frequent users compared to the mainstream ED population, to evaluate how effectively these disorders were diagnosed in both groups of patients by ED physicians, and to determine if these disorders were predictive of a frequent use of ED services | 389     | Fisher exact tests<br>Chi-square test<br>Logistic regression                                                                  |
| Wajnberg, A. <i>et al.</i><br>2012<br>United States  | All                                | $\geq 4$ visits over 6 months |  | To determine factors associated with frequent ED utilization by older adults                                                                                                                                                                                                                                                                   | 5,718   | Chi-square test<br>t-test                                                                                                     |
| Watase, H. <i>et al.</i><br>2015<br>Japan            | Adults with asthma                 | $\geq 2$ visits per year      |  | To characterise the adult patients who frequently presented to the ED for asthma exacerbation in Japan                                                                                                                                                                                                                                         | 1,002   | One-way analysis of variance<br>Chi-square test<br>Kruskal-Wallis test<br>Logistic regression<br>Negative binomial regression |
| Weidner, T.K. <i>et al.</i><br>2018<br>United States | Patients with colorectal cancer    | $\geq 3$ visits per year      |  | To assess ED utilization in patients with colorectal cancer to identify factors associated with ED visits and subsequent admission, as well as identify a high-risk subset of patients that could be targeted to reduce ED visits                                                                                                              | 13,446  | Chi-square test<br>t-test<br>Logistic regression<br>Negative binomial regression                                              |
| Wong, T.H. <i>et al.</i><br>2018<br>Singapore        | Patients with cancer               | $\geq 4$ visits per year      |  | To identify factors associated with patients becoming ED frequent attenders after a cancer-related hospitalization                                                                                                                                                                                                                             | 47,235  | Cox regression<br>Survival analysis                                                                                           |

|    |    |    |    |    |    |    |    |    |    |    |
|----|----|----|----|----|----|----|----|----|----|----|
| 1  | 2  | 3  | 4  | 5  | 6  | 7  | 8  | 9  | 10 | 11 |
| 12 | 13 | 14 | 15 | 16 | 17 | 18 | 19 | 20 | 21 | 22 |
| 23 | 24 | 25 | 26 | 27 | 28 | 29 | 30 | 31 | 32 | 33 |
| 34 | 35 | 36 | 37 | 38 | 39 | 40 | 41 | 42 | 43 | 44 |
| 45 | 46 | 47 | 48 | 49 | 50 | 51 | 52 | 53 | 54 | 55 |
| 56 | 57 | 58 | 59 | 60 |    |    |    |    |    |    |

117

118 **Fig 2. Number of studies by country.**119 **Regression**

120 Regression tools consist of a set of processes aimed at quantifying the relationships  
 121 between a dependent variable and other explanatory variables [14]. They are useful for  
 122 description and prediction. Some regression models may be *regularized*, which in this case  
 123 means avoiding overfitting with too many explanatory variables, or *zero-truncated*, which  
 124 means that the model is not allowed to take null values.

125 Out of the four categories (regression, hypothesis testing, machine learning, and other  
 126 tools), the most reported tool was the logistic regression (90 studies [3-5, 15-101], two of  
 127 which are regularized by LASSO or elastic net techniques), followed by the binomial  
 128 regression (13 studies [18, 46, 55, 73, 76, 77, 82, 89, 102-106], 2 of which are  
 129 zero-truncated). To a lesser extent, the Poisson regression (seven studies [77, 107-112],  
 130 one of which is zero-truncated), the linear regression (six studies [74, 76, 102, 113-115]),

1  
2  
3 131 the analysis of variance (six studies [44, 59, 73, 96, 103, 104]), the Cox regression (four  
4  
5 132 studies [87, 93, 105, 116]), and hierarchical models (one study [90]) were also used. In  
6  
7  
8 133 those studies, the results are often associated with odds-ratios. The mixed-effects models  
9  
10 134 were mentioned three times [39, 91, 117]. Regression parameters were estimated by  
11  
12 135 generalized estimating equations in four studies [18, 103, 106, 118] while parameter  
13  
14 136 confidence intervals were estimated by the bootstrap procedure (two studies [25, 67]) and  
15  
16 137 the Clopper-Pearson method (one study [25]). The receiver operating characteristic curve  
17  
18 138 (ROC), or equivalently the sensitivity, specificity, or area under the curve (“c-statistic”),  
19  
20 139 was computed in ten studies [4, 36, 48, 64, 75, 83, 88, 107, 117, 119]. Finally, two studies  
21  
22 140 performed imputation to account for missing data (Markov chain Monte Carlo and multiple  
23  
24 141 imputations [78, 90]).

## 142 **Hypothesis testing**

143 Statistical tests aim at testing a specific hypothesis about data and rely on probability  
144 distributions [120]. In the selected studies, the tests aimed mainly at comparing two  
145 samples (frequent users and non-frequent users).

146 The most common statistical tests were the chi-square test (53 studies [17, 28, 31, 34, 36-  
147 38, 40-42, 47, 49, 52, 54, 56, 58, 60, 62-69, 72-74, 76, 77, 79-82, 85, 88, 89, 94, 96, 97,  
148 101-104, 109, 110, 112, 115, 119, 121-124]) and the t-test (24 studies [40, 45, 47, 49, 62,  
149 63, 65, 66, 74, 77, 79, 81, 85, 89, 94, 95, 97, 98, 109, 114, 115, 122, 124, 125]), which  
150 measured associations between variables and goodness-of-fit. As an alternative to the  
151 chi-square test for association, five studies used the Fisher exact test [63, 72, 94, 98, 119].  
152 Sample mean differences were assessed by 23 studies with the Mann-Whitney U test (also  
153 called the Wilcoxon rank-sum test [20, 23, 31, 47, 58, 66, 77, 98, 110, 119, 121, 123-125]),

1  
2  
3 154 its variant for dependent samples the Wilcoxon signed rank test [40, 101], or the  
4  
5 155 Kruskal-Wallis test [23, 37, 42, 68, 73, 76, 102]. The difference in proportions test [126],  
6  
7 156 Mantel-Haenszel test (test for differences in contingency tables, two studies [44, 117]), the  
8  
9 157 likelihood ratio test (significance test for nested models, two studies [64, 67]), the  
10  
11 158 Hosmer-Lemeshow test (goodness-of-fit for logistic regression, two studies [67, 70]), the  
12  
13 159 Wald test (significance test for regression coefficients, two studies [30, 96]), and the  
14  
15 160 Breslow-Day test (test for homogeneity in contingency tables odds ratio [53]) were also  
16  
17 161 used to a lesser degree. Finally, one study checked the assumption of normality with the  
18  
19 162 Kolmogorov-Smirnov test [66].  
20  
21  
22  
23

## 24 163 **Machine learning**

25  
26  
27 164 Machine learning tools are a set of algorithms that can learn and adapt to data in order to  
28  
29 165 classify or predict, for instance [127]. In the selected studies, the machine learning tools  
30  
31 166 aimed mainly at classifying users (frequent versus non-frequent).  
32  
33  
34

35 167 Two studies used random forests [31, 36] along with support vector machines. Decision  
36  
37 168 trees, which include classification and regression trees, were implemented by five studies  
38  
39 169 [5, 31, 36, 61, 113]. Adaptive boosting, or AdaBoost, is a meta-algorithm that combines  
40  
41 170 with other algorithms and helps for better performances. It was computed in two studies  
42  
43 171 [36, 61].  
44  
45  
46

## 47 172 **Other tools**

48  
49  
50 173 Two studies used survival analysis [50, 116], while another one fitted a nonparametric  
51  
52 174 distribution to their data [25]. Finally, maximum likelihood monotone coarse classifier  
53  
54  
55  
56  
57  
58  
59  
60



1  
2  
3 175 algorithm was used as a binning method [91] and non-negative matrix factorization as a  
4  
5 176 clustering technique [115].  
6  
7  
8

## 9 177 **4. Discussion**

10  
11  
12 178 The most exploited statistical tools arguably came from regression analysis. This may be  
13  
14 179 because regression is well established in medical statistics or also because it is the most  
15  
16  
17 180 natural tool when trying to find significant variables to explain a dependent variable (in  
18  
19 181 this case, to be a frequent user). Moreover, it allows predicting easily the risk of a new user  
20  
21 182 becoming a frequent user, depending on its covariates. Other tools from hypothesis testing  
22  
23  
24 183 or machine learning also proved to be popular, albeit to a much lesser extent. Combining  
25  
26 184 these statistical techniques may help in discovering significant and complementary  
27  
28 185 patterns, compared to using tools from one class only. In our scoping review, two studies  
29  
30 186 mixed statistical tools from regression, hypothesis testing, and machine learning [31, 36].  
31  
32  
33 187 In those studies, the author evaluated various performance criteria. While logistic  
34  
35 188 regression performed well, other techniques such as random forests or LASSO regression  
36  
37 189 were also competitive. Besides the fact that logistic regression can display modest  
38  
39 190 performances [128], random forests and LASSO regression can complete logistic  
40  
41  
42 191 regression. The first technique can be used to assess the importance of each independent  
43  
44 192 variable in the model, while the second technique can be useful for automatic selection of  
45  
46 193 features. Likewise, using a variety of statistical tools can help complete or confirm results  
47  
48 194 obtained with established methodologies. Different tools from one class can also be mixed  
49  
50 195 in order to achieve different stages of the analysis (for instance, different types of  
51  
52 196 regression [82]).  
53  
54  
55  
56  
57  
58  
59  
60

1  
2  
3 197 The analysis of frequent ED users could benefit from using more machine learning  
4  
5 198 techniques. Those were found to be not as common as regression or hypothesis testing,  
6  
7  
8 199 although they are especially appropriate when dealing with classification, prediction, or  
9  
10 200 big data. Tools such as support vector machines (which were used by two studies in this  
11  
12 201 scoping review [31, 36]), artificial neural networks, or Bayesian networks are common  
13  
14 202 classifiers and predictors in the artificial intelligence community [129]. They are popular  
15  
16 203 for instance in cancer diagnostic and prognosis, which strongly rely on classification and  
17  
18 204 prediction [130-132]. In particular, support vector machines, decision trees or  
19  
20 205 self-organizing maps can deal with binary outcomes, which is usually the case for frequent  
21  
22 206 use outcomes. They usually require large datasets in order to overcome overfitting, but this  
23  
24 207 is becoming less and less of an issue in health sciences [133]. Nevertheless, machine  
25  
26 208 learning tools often use a black box approach as there are many intermediary steps leading  
27  
28 209 to the final solution. While each step usually consists of simple arithmetic operations, their  
29  
30 210 multiple interactions can be more difficult to interpret. In spite of this opacity, they still  
31  
32 211 display good performances in classifying and predicting. In some cases, they may be more  
33  
34 212 accurate than the widely used logistic regression [134]. Those methods would thus turn out  
35  
36 213 to be less useful in data exploration [135]. Machine learning tools are getting popular in  
37  
38 214 other fields in health sciences, such as critical care [136], cardiology [137] or emergency  
39  
40 215 medicine [138]. The authors state that their fields would benefit from this growing  
41  
42 216 popularity, though results need to be analyzed and interpreted in collaboration with  
43  
44 217 clinicians.

51  
52 218 Other tools exist that may also be suitable for describing the associated variables or the  
53  
54 219 prediction of frequent ED users but were not reported in the literature. Among those,  
55  
56  
57  
58  
59

1  
2  
3 220 principal component analysis (PCA) is a dimensional reduction and visualization  
4  
5 221 technique, sometimes used with cluster or discriminant analysis [139]. Based on all the  
6  
7 222 original explanatory variables, PCA constructs new ones by summing and weighing them  
8  
9 223 differently. More weight is given to relevant variables so that those latter become dominant  
10  
11 224 in the new constructions while still including all variables. For instance,  
12  
13 225 Burgel *et al.* (2010) built chronic obstructive pulmonary disease clinical phenotypes by  
14  
15 226 constructing new relevant variables with PCA and by grouping similar subjects in this new  
16  
17 227 space with cluster analysis [140]. Moreover, PCA has already been used for the  
18  
19 228 construction of questionnaires and diagnosis tools in a medical context [141, 142], both of  
20  
21 229 which can prove useful in the identification of frequent users.  
22  
23  
24  
25  
26

27 230 As mentioned, regression techniques were common in the selected studies. Yet, quantile  
28  
29 231 regression (QR, [143]) was not mentioned. QR is a generalization of mean regression in  
30  
31 232 the sense that its focus is not only the mean of the dependent variable distribution (such as  
32  
33 233 in classical linear regression) but any quantile of it. QR thus represents an alternative to  
34  
35 234 define frequent users by the high quantiles of ED visit distribution (e.g. the 90th quantile).  
36  
37 235 Eight studies [25, 27, 46, 48, 51, 54, 62, 121] defined frequent users with quantiles, but  
38  
39 236 they did not use QR. QR would allow for finer investigations in the different quantiles of  
40  
41 237 ED users in relationship to the explanatory variables. For instance, the association between  
42  
43 238 age and the number of ED visits may be significantly different across the 10th (low users)  
44  
45 239 and 90th (frequent users) quantiles. Such a heterogeneous association would be uncovered  
46  
47 240 by QR, while usually unseen with a classical mean regression. Ding *et al.* (2010) used QR  
48  
49 241 to characterize waiting room and treatment times in EDs [144]. They explored the lowest,  
50  
51 242 median and highest of those times and highlighted predictors that were significant only in  
52  
53  
54  
55  
56  
57  
58  
59  
60

1  
2  
3 243 particular quantiles. Usually, QR requires a continuous dependent variable as opposed to a  
4  
5 244 logistic regression, though it is possible to combine these two regressions [145].  
6  
7  
8 245 Furthermore, defining frequent users by quantiles would allow for better comparison  
9  
10 246 between studies as there is no common definition for frequent users.  
11  
12

## 13 247 **Strengths and limitations**

14  
15  
16 248 To the best of our knowledge, this scoping review is the first to list statistical tools that are  
17  
18 249 used in the identification of variables associated with frequent ED use and the prediction  
19  
20 250 of frequent users. Besides, it was conducted following a well-defined methodological  
21  
22 251 framework. The search strategies were designed with an information specialist in three  
23  
24 252 different databases. Two independent evaluators selected the articles and extracted the data  
25  
26 253 while a third independent evaluator settled disagreements, ensuring that all included studies  
27  
28 254 were relevant. One limitation of our study is that quality assessment is not performed in a  
29  
30 255 scoping review. However, this should not alter the results, since the aim was to list which  
31  
32 256 statistical tools have been applied in the literature. Moreover, the majority of articles were  
33  
34 257 in English, which may introduce a selection bias (for instance, one excluded article was in  
35  
36 258 Spanish). More than half of the reviewed studies were indeed conducted in the USA,  
37  
38 259 making the results difficult to compare to other countries.  
39  
40  
41  
42  
43  
44

## 45 260 **5. Conclusions**

46  
47  
48 261 Frequent ED users represent a complex issue, and their analysis require adequate statistical  
49  
50 262 tools. In this context, this scoping review shows that some tools are well established, such  
51  
52 263 as logistic regression and chi-square test, while others such as support vector machines are  
53  
54  
55  
56  
57  
58  
59  
60

1  
2  
3 264 less so, though they would deserve to get more attention. It also outlines some research  
4  
5 265 opportunities with other tools not yet explored.  
6  
7  
8

## 9 266 **Acknowledgments**

10  
11  
12 267 We would like to thank information specialist Josée Toulouse for her help in defining the  
13  
14 268 search strategies and Tina Wey (PhD) for revising the text.  
15  
16  
17

## 18 269 **Authors contributions**

19  
20  
21 270 YC and CH designed the study with FRH, ID, and AV. YC, ID, CH, and MB collected and  
22  
23 271 analysed the data. YC and CH wrote the first draft of the manuscript. FRH, ID, AV, MCC,  
24  
25 272 and MB contributed to the writing of the manuscript. All authors read and approved the  
26  
27  
28 273 final manuscript.  
29  
30

## 31 274 **Funding**

32  
33  
34  
35 275 This work was financed by grants from the *Fonds de recherche du Québec – Santé* and the  
36  
37 276 *Centre de recherche du Centre hospitalier universitaire de Sherbrooke*. The funders had  
38  
39 277 no role in study design, data collection and analysis, decision to publish, or preparation of  
40  
41  
42 278 the manuscript.  
43  
44

## 45 279 **Competing interests**

46  
47  
48 280 The authors declare that they have no competing interests.  
49  
50

## 51 281 **Data sharing statement**

52  
53  
54  
55 282 No additional data are available.  
56  
57  
58  
59  
60

## 283 References

- 284 1. Kumar GS, Klein R. Effectiveness of case management strategies in reducing  
285 emergency department visits in frequent user patient populations: a systematic review. *J*  
286 *Emerg Med.* 2013;44(3):717-29. Epub 2012/12/04. doi: 10.1016/j.jemermed.2012.08.035.  
287 PubMed PMID: 23200765.
- 288 2. LaCalle E, Rabin E. Frequent users of emergency departments: the myths, the data,  
289 and the policy implications. *Ann Emerg Med.* 2010;56(1):42-8. Epub 2010/03/30. doi:  
290 10.1016/j.annemergmed.2010.01.032. PubMed PMID: 20346540.
- 291 3. Hunt KA, Weber EJ, Showstack JA, Colby DC, Callaham ML. Characteristics of  
292 Frequent Users of Emergency Departments. *ANN EMERG MED.* 2006;48(1):1-8. doi:  
293 10.1016/j.annemergmed.2005.12.030.
- 294 4. Doupe MB, Palatnick W, Day S, Chateau D, Soodeen RA, Burchill C, et al.  
295 Frequent users of emergency departments: Developing standard definitions and defining  
296 prominent risk factors. *ANN EMERG MED.* 2012;60(1):24-32. doi:  
297 10.1016/j.annemergmed.2011.11.036.
- 298 5. Hudon C, Courteau J, Krieg C, Vanasse A. Factors associated with chronic frequent  
299 emergency department utilization in a population with diabetes living in metropolitan  
300 areas: A population-based retrospective cohort study. *BMC Health Serv Res.* 2017;17(1).  
301 doi: 10.1186/s12913-017-2453-3.
- 302 6. Krieg C, Hudon C, Chouinard MC, Dufour I. Individual predictors of frequent  
303 emergency department use: A scoping review. *BMC Health Serv Res.* 2016;16(1). doi:  
304 10.1186/s12913-016-1852-1.
- 305 7. Ruger JP, Richter CJ, Spitznagel EL, Lewis LM. Analysis of costs, length of stay,  
306 and utilization of emergency department services by frequent users: implications for health  
307 policy. *Acad Emerg Med.* 2004;11(12):1311-7. Epub 2004/12/04. doi:  
308 10.1197/j.aem.2004.07.008. PubMed PMID: 15576522.
- 309 8. Bodenheimer T, Berry-Millett R. Care management of patients with complex health  
310 care needs. *Policy.* 2009;1:6.
- 311 9. Arksey H, O'Malley L. Scoping studies: towards a methodological framework.  
312 *International journal of social research methodology.* 2005;8(1):19-32.
- 313 10. Levac D, Colquhoun H, O'Brien KK. Scoping studies: advancing the methodology.  
314 *Implement Sci.* 2010;5(1):69. Epub 2010/09/22. doi: 10.1186/1748-5908-5-69. PubMed  
315 PMID: 20854677; PubMed Central PMCID: PMC2954944.
- 316 11. Mays N, Roberts E, Popay J. Synthesising research evidence. *Studying the*  
317 *organisation and delivery of health services: Research methods.* 2001:188-220.
- 318 12. Everitt BS, Skrondal A. *The Cambridge Dictionary of Statistics.* 4th ed. Cambridge:  
319 Cambridge University Press Cambridge; 2010.
- 320 13. Vaismoradi M, Turunen H, Bondas T. Content analysis and thematic analysis:  
321 Implications for conducting a qualitative descriptive study. *Nurs Health Sci.*  
322 *2013;15(3):398-405.* Epub 2013/03/14. doi: 10.1111/nhs.12048. PubMed PMID:  
323 23480423.
- 324 14. Harrell FE, Jr. *Regression modeling strategies: with applications to linear models,*  
325 *logistic and ordinal regression, and survival analysis.* 2 ed. New York: Springer  
326 International Publishing; 2015.

- 1  
2  
3 327 15. Aagaard J, Aagaard A, Buus N. Predictors of frequent visits to a psychiatric  
4 328 emergency room: a large-scale register study combined with a small-scale interview study.  
5 329 *Int J Nurs Stud.* 2014;51(7):1003-13. Epub 2013/12/10. doi:  
6 330 10.1016/j.ijnurstu.2013.11.002. PubMed PMID: 24315543.
- 7  
8 331 16. Adams RJ, Smith BJ, Ruffin RE. Factors associated with hospital admissions and  
9 332 repeat emergency department visits for adults with asthma. *Thorax.* 2000;55(7):566-73.  
10 333 doi: 10.1136/thorax.55.7.566.
- 11 334 17. Alghanim SA, Alomar BA. Frequent use of emergency departments in Saudi public  
12 335 hospitals: Implications for primary health care services. *Asia-Pac J Public Health.*  
13 336 2015;27(2):NP2521-NP30. doi: 10.1177/1010539511431603.
- 14 337 18. Alpern ER, Clark AE, Alessandrini EA, Gorelick MH, Kittick M, Stanley RM, et  
15 338 al. Recurrent and high-frequency use of the emergency department by pediatric patients.  
16 339 *Academic Emergency Medicine.* 2014;21(4):365-73. doi: 10.1111/acem.12347.
- 17 340 19. Arfken CL, Zeman LL, Yeager L, White A, Mischel E, Amirsadri A. Case-control  
18 341 study of frequent visitors to an urban psychiatric emergency service. *Psychiatr Serv.*  
19 342 2004;55(3):295-301. Epub 2004/03/06. doi: 10.1176/appi.ps.55.3.295. PubMed PMID:  
20 343 15001731.
- 21 344 20. Bieler G, Paroz S, Faouzi M, Trueb L, Vaucher P, Althaus F, et al. Social and  
22 345 medical vulnerability factors of emergency department frequent users in a universal health  
23 346 insurance system. *Acad Emerg Med.* 2012;19(1):63-8. Epub 2012/01/10. doi:  
24 347 10.1111/j.1553-2712.2011.01246.x. PubMed PMID: 22221292.
- 25 348 21. Billings J, Raven MC. Dispelling an urban legend: frequent emergency department  
26 349 users have substantial burden of disease. *Health Aff (Millwood).* 2013;32(12):2099-108.  
27 350 Epub 2013/12/05. doi: 10.1377/hlthaff.2012.1276. PubMed PMID: 24301392; PubMed  
28 351 Central PMCID: PMC4892700.
- 29 352 22. Boyer L, Dassa D, Belzeaux R, Henry JM, Samuelian JC, Baumstarck-Barrau K, et  
30 353 al. Frequent visits to a French psychiatric emergency service: diagnostic variability in  
31 354 psychotic disorders. *Psychiatr Serv.* 2011;62(8):966-70. Epub 2011/08/03. doi:  
32 355 10.1176/ps.62.8.pss6208\_0966. PubMed PMID: 21807840.
- 33 356 23. Brennan JJ, Chan TC, Hsia RY, Wilson MP, Castillo EM. Emergency department  
34 357 utilization among frequent users with psychiatric visits. *Acad Emerg Med.*  
35 358 2014;21(9):1015-22. Epub 2014/10/02. doi: 10.1111/acem.12453. PubMed PMID:  
36 359 25269582.
- 37 360 24. Buhumaid R, Riley J, Sattarian M, Bregman B, Blanchard J. Characteristics of  
38 361 frequent users of the emergency department with psychiatric conditions. *J Health Care Poor*  
39 362 *Underserved.* 2015;26(3):941-50.
- 40 363 25. Cabey WV, Macneill E, White LN, Norton HJ, Mitchell AM. Frequent pediatric  
41 364 emergency department use in infancy and early childhood. *Pediatr Emerg Care.*  
42 365 2014;30(10):710-7. doi: 10.1097/PEC.0000000000000233.
- 43 366 26. Castner J, Wu YWB, Mehrok N, Gadre A, Hewner S. Frequent emergency  
44 367 department utilization and behavioral health diagnoses. *Nurs Res.* 2015;64(1):3-12. doi:  
45 368 10.1097/NNR.0000000000000065.
- 46 369 27. Chambers C, Chiu S, Katic M, Kiss A, Redelmeier DA, Levinson W, et al. High  
47 370 Utilizers of Emergency Health Services in a Population-Based Cohort of Homeless Adults.  
48 371 *American journal of public health.* 2013;103(S2):S302-10. doi:

- 1  
2  
3 372 10.2105/AJPH.2013.301397. PubMed PMID: 104161876. Language: English. Entry Date:  
4 373 20131126. Revision Date: 20150711. Publication Type: Journal Article.  
5 374 28. Chang G, Weiss AP, Orav EJ, Rauch SL. Predictors of frequent emergency  
6 375 department use among patients with psychiatric illness. *Gen Hosp Psychiatry*.  
7 376 2014;36(6):716-20. Epub 2014/10/15. doi: 10.1016/j.genhosppsych.2014.09.010. PubMed  
8 377 PMID: 25312277.  
9 378 29. Chukmaitov AS, Tang A, Carretta HJ, Menachemi N, Brooks RG. Characteristics  
10 379 of all, occasional, and frequent emergency department visits due to ambulatory care-  
11 380 sensitive conditions in Florida. *J Ambul Care Manage*. 2012;35(2):149-58. doi:  
12 381 10.1097/JAC.0b013e318244d222.  
13 382 30. Colligan EM, Pines JM, Colantuoni E, Howell B, Wolff JL. Risk Factors for  
14 383 Persistent Frequent Emergency Department Use in Medicare Beneficiaries. *Ann Emerg*  
15 384 *Med*. 2016;67(6):721-9. Epub 2016/03/08. doi: 10.1016/j.annemergmed.2016.01.033.  
16 385 PubMed PMID: 26947801.  
17 386 31. Das LT, Abramson EL, Stone AE, Kondrich JE, Kern LM, Grinspan ZM.  
18 387 Predicting frequent emergency department visits among children with asthma using EHR  
19 388 data. *Pediatr Pulmonol*. 2017;52(7):880-90. doi: 10.1002/ppul.23735.  
20 389 32. Doran KM, Colucci AC, Wall SP, Williams ND, Hessler RA, Goldfrank LR, et al.  
21 390 Reasons for emergency department use: do frequent users differ? *Am J Manag Care*.  
22 391 2014;20(11):e506-e14.  
23 392 33. Doran KM, Raven MC, Rosenheck RA. What drives frequent emergency  
24 393 department use in an integrated health system? National data from the veterans health  
25 394 administration. *ANN EMERG MED*. 2013;62(2):151-9. doi:  
26 395 10.1016/j.annemergmed.2013.02.016.  
27 396 34. Fernandes AK, Mallmann F, Steinhorst AMP, Nogueira FL, Ávila EM, Saucedo  
28 397 DZ, et al. Characteristics of Acute Asthma Patients Attended Frequently Compared with  
29 398 Those Attended Only Occasionally in an Emergency Department. *J Asthma*.  
30 399 2003;40(6):683-90. doi: 10.1081/JAS-120023487.  
31 400 35. Frost DW, Vembu S, Wang J, Tu K, Morris Q, Abrams HB. Using the Electronic  
32 401 Medical Record to Identify Patients at High Risk for Frequent Emergency Department  
33 402 Visits and High System Costs. *Am J Med*. 2017;130(5):601.e17-.e22. doi:  
34 403 10.1016/j.amjmed.2016.12.008.  
35 404 36. Grinspan ZM, Shapiro JS, Abramson EL, Hooker G, Kaushal R, Kern LM.  
36 405 Predicting frequent ED use by people with epilepsy with health information exchange data.  
37 406 *Neurology*. 2015;85(12):1031-8. doi: 10.1212/WNL.0000000000001944.  
38 407 37. Hasegawa K, Tsugawa Y, Brown DFM, Camargo Jr CA. A population-based study  
39 408 of adults who frequently visit the emergency department for acute asthma: California and  
40 409 Florida, 2009-2010. *Ann Am Thorac Soc*. 2014;11(2):158-66. doi:  
41 410 10.1513/AnnalsATS.201306-166OC.  
42 411 38. Huang JA, Tsai WC, Chen YC, Hu WH, Yang DY. Factors associated with frequent  
43 412 use of emergency services in a medical center. *J Formos Med Assoc*. 2003;102(4):222-8.  
44 413 39. Hudon C, Sanche S, Haggerty JL. Personal Characteristics and Experience of  
45 414 Primary Care Predicting Frequent Use of Emergency Department: A Prospective Cohort  
46 415 Study. *PLoS One*. 2016;11(6):e0157489. Epub 2016/06/15. doi:  
47 416 10.1371/journal.pone.0157489. PubMed PMID: 27299525; PubMed Central PMCID:  
48 417 PMCPMC4907452.



- 1  
2  
3 418 40. Kerr T, Wood E, Grafstein E, Ishida T, Shannon K, Lai C, et al. High rates of  
4 419 primary care and emergency department use among injection drug users in Vancouver.  
5 420 *Journal of Public Health*. 2005;27(1):62-6. doi: 10.1093/pubmed/fdh189.
- 6 421 41. Kirby SE, Dennis SM, Jayasinghe UW, Harris MF. Patient related factors in  
7 422 frequent readmissions: The influence of condition, access to services and patient choice.  
8 423 *BMC Health Serv Res*. 2010;10. doi: 10.1186/1472-6963-10-216.
- 9 424 42. Kirby SE, Dennis SM, Jayasinghe UW, Harris MF. Frequent emergency attenders:  
10 425 Is there a better way? *Aust Health Rev*. 2011;35(4):462-7. doi: 10.1071/AH10964.
- 11 426 43. Ko M, Lee Y, Chen C, Chou P, Chu D. Prevalence of and predictors for frequent  
12 427 utilization of emergency department: A population-based study. *Medicine*. 2015;94(29).  
13 428 doi: 10.1097/MD.0000000000001205.
- 14 429 44. Ledoux Y, Minner P. Occasional and frequent repeaters in a psychiatric emergency  
15 430 room. *Soc Psychiatry Psychiatr Epidemiol*. 2006;41(2):115-21. Epub 2006/03/02. doi:  
16 431 10.1007/s00127-005-0010-6. PubMed PMID: 16508721.
- 17 432 45. Legramante JM, Morciano L, Lucaroni F, Gilardi F, Caredda E, Pesaresi A, et al.  
18 433 Frequent use of emergency departments by the elderly population when continuing care is  
19 434 not well established. *PLoS ONE*. 2016;11(12). doi: 10.1371/journal.pone.0165939.
- 20 435 46. Leporatti L, Ameri M, Trincherio C, Orcamo P, Montefiori M. Targeting frequent  
21 436 users of emergency departments: Prominent risk factors and policy implications. *Health*  
22 437 *Policy*. 2016;120(5):462-70. doi: 10.1016/j.healthpol.2016.03.005.
- 23 438 47. Lim SF, Wah W, Pasupathi Y, Yap S, Koh MS, Tan KL, et al. Frequent attenders  
24 439 to the ED: patients who present with repeated asthma exacerbations. *Am J Emerg Med*.  
25 440 2014;32(8):895-9. Epub 2014/06/13. doi: 10.1016/j.ajem.2014.04.052. PubMed PMID:  
26 441 24919775.
- 27 442 48. Limsrivilai J, Stidham RW, Govani SM, Waljee AK, Huang W, Higgins PDR.  
28 443 Factors That Predict High Health Care Utilization and Costs for Patients With  
29 444 Inflammatory Bowel Diseases. *Clin Gastroenterol Hepatol*. 2017;15(3):385-92.e2. doi:  
30 445 10.1016/j.cgh.2016.09.012.
- 31 446 49. Liu SW, Nagurney JT, Chang Y, Parry BA, Smulowitz P, Atlas SJ. Frequent ED  
32 447 users: Are most visits for mental health, alcohol, and drug-related complaints? *AM J*  
33 448 *EMERG MED*. 2013;31(10):1512-5. doi: 10.1016/j.ajem.2013.08.006.
- 34 449 50. Mandelberg JH, Kuhn RE, Kohn MA. Epidemiologic analysis of an urban, public  
35 450 emergency department's frequent users. *Academic Emergency Medicine*. 2000;7(6):637-  
36 451 46.
- 37 452 51. Mann EG, Johnson A, VanDenKerkhof EG. Frequency and characteristics of  
38 453 healthcare visits associated with chronic pain: results from a population-based Canadian  
39 454 study. *Can J Anesth*. 2016;63(4):411-41. doi: 10.1007/s12630-015-0578-6.
- 40 455 52. McMahon CG, Power Foley M, Robinson D, O'Donnell K, Poulton M, Kenny RA,  
41 456 et al. High prevalence of frequent attendance in the over 65s. *Eur J Emerg Med*. 2016. Epub  
42 457 2016/05/04. doi: 10.1097/mej.0000000000000406. PubMed PMID: 27139928.
- 43 458 53. Milani SA, Crooke H, Cottler LB, Striley CW. Sex differences in frequent ED use  
44 459 among those with multimorbid chronic diseases. *AM J EMERG MED*. 2016;34(11):2127-  
45 460 31. doi: 10.1016/j.ajem.2016.07.059.
- 46 461 54. Mueller EL, Hall M, Carroll AE, Shah SS, Macy ML. Frequent Emergency  
47 462 Department Utilizers Among Children with Cancer. *Pediatr Blood Cancer*.  
48 463 2016;63(5):859-64. Epub 2016/02/04. doi: 10.1002/pbc.25929. PubMed PMID: 26841193.

- 1  
2  
3 464 55. Nambiar D, Stoové M, Dietze P. Frequent emergency department presentations  
4 465 among people who inject drugs: A record linkage study. *Int J Drug Policy*. 2017;44:115-  
5 466 20. doi: 10.1016/j.drugpo.2017.03.010.
- 6 467 56. Neufeld E, Viau KA, Hirdes JP, Warry W. Predictors of frequent emergency  
7 468 department visits among rural older adults in Ontario using the Resident Assessment  
8 469 Instrument-Home Care. *Austr J Rural Health*. 2016;24(2):115-22. doi: 10.1111/ajr.12213.
- 9 470 57. Norman C, Mello M, Choi B. Identifying Frequent Users of an Urban Emergency  
10 471 Medical Service Using Descriptive Statistics and Regression Analyses. *West J Emerg Med*.  
11 472 2016;17(1):39-45. Epub 2016/01/30. doi: 10.5811/westjem.2015.10.28508. PubMed  
12 473 PMID: 26823929; PubMed Central PMCID: PMC4729417.
- 13 474 58. Palmer E, Leblanc-Duchin D, Murray J, Atkinson P. Emergency department use:  
14 475 Is frequent use associated with a lack of primary care provider? *Can Fam Phys*.  
15 476 2014;60(4):e223-e9.
- 16 477 59. Panopolis P, Gillis JZ, Yazdany J, Trupin L, Hersh A, Julian L, et al. Frequent use  
17 478 of the emergency department among persons with systemic lupus erythematosus. *Arthritis*  
18 479 *Care Res (Hoboken)*. 2010;62(3):401-8. Epub 2010/04/15. doi: 10.1002/acr.20107.  
19 480 PubMed PMID: 20391487; PubMed Central PMCID: PMC3759153.
- 20 481 60. Paul P, Heng BH, Seow E, Molina J, Tay SY. Predictors of frequent attenders of  
21 482 emergency department at an acute general hospital in Singapore. *Emerg Med J*.  
22 483 2010;27(11):843-8. doi: 10.1136/emj.2009.079160.
- 23 484 61. Pereira M, Singh V, Hon CP, Greg McKelvey T, Sushmita S, De Cock M, editors.  
24 485 Predicting future frequent users of emergency departments in California state2016:  
25 486 Association for Computing Machinery, Inc.
- 26 487 62. Pines JM, Buford K. Predictors of frequent emergency department utilization in  
27 488 Southeastern Pennsylvania. *J Asthma*. 2006;43(3):219-23. doi:  
28 489 10.1080/02770900600567015.
- 29 490 63. Quilty S, Shannon G, Yao A, Sargent W, McVeigh MF. Factors contributing to  
30 491 frequent attendance to the emergency department of a remote Northern Territory hospital.  
31 492 *Med J Aust*. 2016;204(3):111.e1-7.
- 32 493 64. Samuels-Kalow ME, Bryan MW, Shaw KN. Predicting Subsequent High-  
33 494 Frequency, Low-Acuity Utilization of the Pediatric Emergency Department. *Acad Pediatr*.  
34 495 2017;17(3):256-60. doi: 10.1016/j.acap.2016.11.008.
- 35 496 65. Schmoll S, Boyer L, Henry JM, Belzeaux R. [Frequent visitors to psychiatric  
36 497 emergency service: Demographical and clinical analysis]. *Encephale*. 2015;41(2):123-9.  
37 498 Epub 2013/10/08. doi: 10.1016/j.encep.2013.01.002. PubMed PMID: 24094984.
- 38 499 66. Soler JJ, Sanchez L, Roman P, Martinez MA, Perpina M. Risk factors of emergency  
39 500 care and admissions in COPD patients with high consumption of health resources. *Respir*  
40 501 *Med*. 2004;98(4):318-29. Epub 2004/04/10. PubMed PMID: 15072172.
- 41 502 67. Sun BC, Burstin HR, Brennan TA. Predictors and outcomes of frequent emergency  
42 503 department users. *Academic Emergency Medicine*. 2003;10(4):320-8. doi:  
43 504 10.1197/aemj.10.4.320.
- 44 505 68. Tangherlini N, Pletcher MJ, Covec MA, Brown JF. Frequent use of emergency  
45 506 medical services by the elderly: a case-control study using paramedic records. *Prehosp*  
46 507 *Disaster Med*. 2010;25(3):258-64. Epub 2010/06/30. PubMed PMID: 20586020.
- 47 508 69. Thakarar K, Morgan JR, Gaeta JM, Hohl C, Drainoni ML. Predictors of Frequent  
48 509 Emergency Room Visits among a Homeless Population. *PLoS One*. 2015;10(4):e0124552.

- 1  
2  
3 510 Epub 2015/04/24. doi: 10.1371/journal.pone.0124552. PubMed PMID: 25906394;  
4 511 PubMed Central PMCID: PMC4407893.
- 5 512 70. Vandyk AD, VanDenKerkhof EG, Graham ID, Harrison MB. Profiling Frequent  
6 513 Presenters to the Emergency Department for Mental Health Complaints: Socio-  
7 514 Demographic, Clinical, and Service Use Characteristics. *Arch Psychiatr Nurs.*  
8 515 2014;28(6):420-5. doi: 10.1016/j.apnu.2014.09.001.
- 9 516 71. Vinton DT, Capp R, Rooks SP, Abbott JT, Ginde AA. Frequent users of US  
10 517 emergency departments: characteristics and opportunities for intervention. *Emerg Med J.*  
11 518 2014;31(7):526-32. Epub 2014/01/30. doi: 10.1136/emmermed-2013-202407. PubMed  
12 519 PMID: 24473411.
- 13 520 72. Vu F, Daepfen JB, Hugli O, Iglesias K, Stucki S, Paroz S, et al. Screening of mental  
14 521 health and substance users in frequent users of a general Swiss emergency department.  
15 522 *BMC Emerg Med.* 2015;15:27. Epub 2015/10/11. doi: 10.1186/s12873-015-0053-2.  
16 523 PubMed PMID: 26452550; PubMed Central PMCID: PMC4600290.
- 17 524 73. Watase H, Hagiwara Y, Chiba T, Camargo CA, Jr., Hasegawa K. Multicentre  
18 525 observational study of adults with asthma exacerbations: who are the frequent users of the  
19 526 emergency department in Japan? *BMJ Open.* 2015;5(4):e007435. Epub 2015/04/30. doi:  
20 527 10.1136/bmjopen-2014-007435. PubMed PMID: 25922104; PubMed Central PMCID:  
21 528 PMC4420980.
- 22 529 74. Woo JH, Grinspan Z, Shapiro J, Rhee SY. Frequent Users of Hospital Emergency  
23 530 Departments in Korea Characterized by Claims Data from the National Health Insurance:  
24 531 A Cross Sectional Study. *PloS one.* 2016;11(1):e0147450. doi:  
25 532 10.1371/journal.pone.0147450.
- 26 533 75. Wu J, Grannis SJ, Xu H, Finnell JT. A practical method for predicting frequent use  
27 534 of emergency department care using routinely available electronic registration data. *BMC*  
28 535 *Emerg Med.* 2016;16:12. Epub 2016/02/11. doi: 10.1186/s12873-016-0076-3. PubMed  
29 536 PMID: 26860825; PubMed Central PMCID: PMC4748445.
- 30 537 76. Hasegawa K, Tsugawa Y, Tsai CL, Brown DFM, Camargo Jr CA. Frequent  
31 538 utilization of the emergency department for acute exacerbation of chronic obstructive  
32 539 pulmonary disease. *Respir Res.* 2014;15(1). doi: 10.1186/1465-9921-15-40.
- 33 540 77. Freitag FG, Kozma CM, Slaton T, Osterhaus JT, Barron R. Characterization and  
34 541 prediction of emergency department use in chronic daily headache patients. *Headache: The*  
35 542 *Journal of Head and Face Pain.* 2005;45(7):891-8.
- 36 543 78. Friedman BW, Serrano D, Reed M, Diamond M, Lipton RB. Use of the Emergency  
37 544 Department for Severe Headache. A Population-Based Study. *Headache: The Journal of*  
38 545 *Head and Face Pain.* 2009;49(1):21-30.
- 39 546 79. O'Toole TP, Pollini R, Gray P, Jones T, Bigelow G, Ford DE. Factors identifying  
40 547 high-frequency and low-frequency health service utilization among substance-using adults.  
41 548 *J Subst Abuse Treat.* 2007;33(1):51-9.
- 42 549 80. Pasic J, Russo J, Roy-Byrne P. High utilizers of psychiatric emergency services.  
43 550 *Psychiatr Serv.* 2005;56(6):678-84. Epub 2005/06/09. doi: 10.1176/appi.ps.56.6.678.  
44 551 PubMed PMID: 15939943.
- 45 552 81. Rask KJ, Williams MV, McNagny SE, Parker RM, Baker DW. Ambulatory health  
46 553 care use by patients in a public hospital emergency department. *J Gen Intern Med.*  
47 554 1998;13(9):614-20.

- 1  
2  
3 555 82. Blonigen DM, Macia KS, Bi X, Suarez P, Manfredi L, Wagner TH. Factors  
4 556 associated with emergency department use among veteran psychiatric patients. *Psychiatr*  
5 557 *Q*. 2017;1-12. doi: 10.1007/s11126-017-9490-2.  
6  
7 558 83. Batra P, Fridman M, Leng M, Gregory KD. Emergency Department Care in the  
8 559 Postpartum Period: California Births, 2009-2011. *Obstet Gynecol*. 2017;130(5):1073-81.  
9 560 Epub 2017/10/11. doi: 10.1097/aog.0000000000002269. PubMed PMID: 29016513.  
10 561 84. Burner E, Ruiz A, Sanchez A, Saenz A H, Ayar E, Treacy-Abarca S, et al. 155  
11 562 Insulin Use Predicts High Emergency Department Utilization Among Patients With Poorly  
12 563 Controlled Diabetes. *ANN EMERG MED*. 2018;72:S65-S. doi:  
13 564 10.1016/j.annemergmed.2018.08.160. PubMed PMID: 132033829. Language: English.  
14 565 Entry Date: In Process. Revision Date: 20181001. Publication Type: Article. Supplement  
15 566 Title: Oct2018:Supplement. Journal Subset: Allied Health.  
16 567 85. Flood C, Sheehan K, Crandall M. Predictors of Emergency Department Utilization  
17 568 Among Children in Vulnerable Families. *Pediatr Emerg Care*. 2017;33(12):765-9. doi:  
18 569 10.1097/PEC.0000000000000658. PubMed PMID: 126685912. Language: English. Entry  
19 570 Date: 20180621. Revision Date: 20180719. Publication Type: journal article. Journal  
20 571 Subset: Biomedical.  
21 572 86. Kanzaria HK, Niedzwiecki MJ, Montoy JC, Raven MC, Hsia RY. Persistent  
22 573 Frequent Emergency Department Use: Core Group Exhibits Extreme Levels Of Use For  
23 574 More Than A Decade. *Health Affairs*. 2017;36(10):1720-8. doi:  
24 575 10.1377/hlthaff.2017.0658. PubMed PMID: 125553100. Language: English. Entry Date:  
25 576 20171011. Revision Date: 20171012. Publication Type: Article.  
26 577 87. Naseer M, Dahlberg L, Fagerström C. Health related quality of life and emergency  
27 578 department visits in adults of age  $\geq 66$  years: a prospective cohort study. *Health & Quality*  
28 579 *of Life Outcomes*. 2018;16(1):N.PAG-N.PAG. doi: 10.1186/s12955-018-0967-y. PubMed  
29 580 PMID: 130887010. Language: English. Entry Date: In Process. Revision Date: 20181027.  
30 581 Publication Type: journal article. Journal Subset: Biomedical.  
31 582 88. Samuels-Kalow M, Peltz A, Rodean J, Hall M, Alpern ER, Aronson PL, et al.  
32 583 Predicting Low-Resource-Intensity Emergency Department Visits in Children. *Acad*  
33 584 *Pediatr*. 2018;18(3):297-304. PubMed PMID: 128897216. Language: English. Entry Date:  
34 585 20180414. Revision Date: 20180928. Publication Type: Article.  
35 586 89. Weidner TK, Kidwell JT, Etzioni DA, Sangaralingham LR, Van Houten HK,  
36 587 Asante D, et al. Factors Associated with Emergency Department Utilization and Admission  
37 588 in Patients with Colorectal Cancer. *Journal of Gastrointestinal Surgery*. 2018;22(5):913-  
38 589 20. doi: 10.1007/s11605-018-3707-z. PubMed PMID: 129629085. Language: English.  
39 590 Entry Date: In Process. Revision Date: 20180523. Publication Type: journal article. Journal  
40 591 Subset: Biomedical.  
41 592 90. Zook HG, Kharbanda AB, Puumala SE, Burgess KA, Pickner W, Payne NR.  
42 593 Emergency Department Utilization by Native American Children. *Pediatr Emerg Care*.  
43 594 2018;34(11):802-9. doi: 10.1097/PEC.0000000000001289. PubMed PMID: 132994315.  
44 595 Language: English. Entry Date: 20181116. Revision Date: 20181116. Publication Type:  
45 596 journal article. Journal Subset: Biomedical.  
46 597 91. Ahn E, Kim J, Rahman K, Baldacchino T, Baird C. Development of a risk  
47 598 predictive scoring system to identify patients at risk of representation to emergency  
48 599 department: a retrospective population-based analysis in Australia. *BMJ Open*.

- 1  
2  
3 600 2018;8(9):e021323. Epub 2018/10/06. doi: 10.1136/bmjopen-2017-021323. PubMed  
4 601 PMID: 30287606; PubMed Central PMCID: PMC6173240.
- 5 602 92. Andrews CM, Westlake M, Wooten N. Availability of Outpatient Addiction  
6 603 Treatment and Use of Emergency Department Services Among Medicaid Enrollees.  
7 604 Psychiatr Serv. 2018;69(6):729-32. Epub 2018/04/27. doi: 10.1176/appi.ps.201700413.  
8 605 PubMed PMID: 29695224.
- 9 606 93. Gruneir A, Cigsar C, Wang X, Newman A, Bronskill SE, Anderson GM, et al.  
10 607 Repeat emergency department visits by nursing home residents: a cohort study using health  
11 608 administrative data. BMC Geriatr. 2018;18(1):157. Epub 2018/07/07. doi:  
12 609 10.1186/s12877-018-0854-8. PubMed PMID: 29976135; PubMed Central PMCID:  
13 610 PMC6034297.
- 14 611 94. Lee J, Lin J, Suter LG, Fraenkel L. Persistently Frequent Emergency Department  
15 612 Utilization among Persons with Systemic Lupus Erythematosus. Arthritis Care Res  
16 613 (Hoboken). 2018. Epub 2018/10/09. doi: 10.1002/acr.23777. PubMed PMID: 30295422.
- 17 614 95. Mann EG, Johnson A, Gilron I, VanDenKerkhof EG. Pain Management Strategies  
18 615 and Health Care Use in Community-Dwelling Individuals Living with Chronic Pain. Pain  
19 616 Med. 2017. Epub 2017/03/25. doi: 10.1093/pm/pnw341. PubMed PMID: 28339989.
- 20 617 96. Colligan EM, Pines JM, Colantuoni E, Wolff JL. Factors Associated with Frequent  
21 618 Emergency Department Use in the Medicare Population. Med Care Res Rev.  
22 619 2017;74(3):311-27. doi: 10.1177/1077558716641826.
- 23 620 97. Cunningham A, Mautner D, Ku B, Scott K, LaNoue M. Frequent emergency  
24 621 department visitors are frequent primary care visitors and report unmet primary care needs.  
25 622 J Eval Clin Pract. 2017;23(3):567-73. doi: 10.1111/jep.12672.
- 26 623 98. Kidane B, Jacob B, Gupta V, Peel J, Saskin R, Waddell TK, et al. Medium and  
27 624 long-term emergency department utilization after oesophagectomy: A population-based  
28 625 analysis. European Journal of Cardio-thoracic Surgery. 2018;54(4):683-8. doi:  
29 626 10.1093/ejcts/ezy155.
- 30 627 99. Schlichting LE, Rogers ML, Gjelsvik A, Linakis JG, Vivier PM. Pediatric  
31 628 Emergency Department Utilization and Reliance by Insurance Coverage in the United  
32 629 States. Academic Emergency Medicine. 2017;24(12):1483-90. doi: 10.1111/acem.13281.
- 33 630 100. Supat B, Brennan JJ, Vilke GM, Ishimine P, Hsia RY, Castillo EM. Characterizing  
34 631 pediatric high frequency users of California emergency departments. Am J Emerg Med.  
35 632 2018. Epub 2019/01/18. doi: 10.1016/j.ajem.2018.12.015. PubMed PMID: 30651182.
- 36 633 101. Peltz A, Samuels-Kalow ME, Rodean J, Hall M, Alpern ER, Aronson PL, et al.  
37 634 Characteristics of children enrolled in medicaid with high-frequency emergency  
38 635 department use. Pediatrics. 2017;140(3). doi: 10.1542/peds.2017-0962.
- 39 636 102. Hasegawa K, Tsugawa Y, Camargo CA, Jr., Brown DF. Frequent utilization of the  
40 637 emergency department for acute heart failure syndrome: a population-based study. Circ  
41 638 Cardiovasc Qual Outcomes. 2014;7(5):735-42. Epub 2014/08/21. doi:  
42 639 10.1161/circoutcomes.114.000949. PubMed PMID: 25139183.
- 43 640 103. Huynh C, Ferland F, Blanchette-Martin N, Ménard JM, Fleury MJ. Factors  
44 641 Influencing the Frequency of Emergency Department Utilization by Individuals with  
45 642 Substance Use Disorders. Psychiatr Q. 2016;87(4):713-28. doi: 10.1007/s11126-016-  
46 643 9422-6.
- 47 644 104. Lin WC, Bharel M, Zhang J, O'Connell E, Clark RE. Frequent emergency  
48 645 department visits and hospitalizations among homeless people with medicaid: Implications

- 1  
2  
3 646 for medicaid expansion. *American journal of public health*. 2015;105:S716-S22. doi:  
4 647 10.2105/AJPH.2015.302693.
- 5 648 105. Beck A, Sanchez-Walker E, Evans LJ, Harris V, Pegler R, Cross S. Characteristics  
6 649 of people who rapidly and frequently reattend the emergency department for mental health  
7 650 needs. *Eur J Emerg Med*. 2016;23(5):351-5. Epub 2015/12/03. doi:  
8 651 10.1097/mej.0000000000000349. PubMed PMID: 26629766.
- 9 652 106. Nambiar D, Spelman T, Stoope M, Dietze P. Are People Who Inject Drugs Frequent  
10 653 Users of Emergency Department Services? A Cohort Study (2008-2013). *Substance use &*  
11 654 *misuse*. 2018;53(3):457-65. Epub 2017/10/17. doi: 10.1080/10826084.2017.1341921.  
12 655 PubMed PMID: 29035611.
- 13 656 107. Christensen EW, Kharbanda AB, Velden HV, Payne NR. Predicting Frequent  
14 657 Emergency Department Use by Pediatric Medicaid Patients. *Popul Health Manag*.  
15 658 2017;20(3):208-15. doi: 10.1089/pop.2016.0051.
- 16 659 108. Hardie TL, Polek C, Wheeler E, McCamant K, Dixson M, Gailey R, et al.  
17 660 Characterising emergency department high-frequency users in a rural hospital. *Emerg Med*  
18 661 *J*. 2015;32(1):21-5. doi: 10.1136/emered-2013-202369.
- 19 662 109. Meyer JP, Qiu J, Chen NE, Larkin GL, Altice FL. Frequent emergency department  
20 663 use among released prisoners with human immunodeficiency virus: Characterization  
21 664 including a novel multimorbidity index. *Academic Emergency Medicine*. 2013;20(1):79-  
22 665 88. doi: 10.1111/acem.12054.
- 23 666 110. Milbrett P, Halm M. Characteristics and predictors of frequent utilization of  
24 667 emergency services. *J Emerg Nurs*. 2009;35(3):191-8; quiz 273. Epub 2009/05/19. doi:  
25 668 10.1016/j.jen.2008.04.032. PubMed PMID: 19446122.
- 26 669 111. Sacamano P, Krawczyk N, Latkin C. Emergency Department Visits in a Cohort of  
27 670 Persons with Substance Use: Incorporating the Role of Social Networks. *Substance use &*  
28 671 *misuse*. 2018;53(13):2265-9. doi: 10.1080/10826084.2018.1461225. PubMed PMID:  
29 672 131395182. Language: English. Entry Date: 20180828. Revision Date: 20180911.  
30 673 Publication Type: Article. Journal Subset: Biomedical.
- 31 674 112. Blair M, Poots AJ, Lim V, Hiles S, Greenfield G, Crehan C, et al. Preschool  
32 675 children who are frequent attenders in emergency departments: an observational study of  
33 676 associated demographics and clinical characteristics. *Arch Dis Child*. 2017. Epub  
34 677 2017/08/05. doi: 10.1136/archdischild-2016-311952. PubMed PMID: 28768622.
- 35 678 113. Andrén KG, Rosenqvist U. Heavy users of an emergency department-A two year  
36 679 follow-up study. *Soc Sci Med*. 1987;25(7):825-31. doi: 10.1016/0277-9536(87)90040-2.
- 37 680 114. Girts TK, Crawford AG, Goldfarb NI, Bachleda M, Grogg A. Predicting high  
38 681 utilization of emergency department services among patients with a diagnosis of psychosis  
39 682 in a medicaid managed care organization. *Dis Manage*. 2002;5(4):189-96.
- 40 683 115. Rauch J, Hüsters J, Babitsch B, Hübner U. Understanding the Characteristics of  
41 684 Frequent Users of Emergency Departments: What Role Do Medical Conditions Play?  
42 685 *Studies in health technology and informatics*. 2018;253:175-9.
- 43 686 116. Wong TH, Lau ZY, Ong WS, Tan KB, Wong YJ, Farid M, et al. Cancer patients as  
44 687 frequent attenders in emergency departments: A national cohort study. *Cancer medicine*.  
45 688 2018;7(9):4434-46. Epub 2018/08/18. doi: 10.1002/cam4.1728. PubMed PMID:  
46 689 30117313; PubMed Central PMCID: PMC6144141.
- 47  
48  
49  
50  
51  
52  
53  
54  
55  
56  
57  
58  
59  
60

- 1  
2  
3 690 117. Neuman MI, Alpern ER, Hall M, Kharbanda AB, Shah SS, Freedman SB, et al.  
4 691 Characteristics of recurrent utilization in pediatric emergency departments. *Pediatrics*.  
5 692 2014;134(4):e1025-e31. doi: 10.1542/peds.2014-1362.  
6  
7 693 118. Ngamini-Ngui A, Fleury MJ, Moisan J, Grégoire JP, Lesage A, Vanasse A. High  
8 694 users of emergency departments in quebec among patients with both schizophrenia and a  
9 695 substance use disorder. *Psychiatr Serv*. 2014;65(11):1389-91.  
10 696 119. Samuels-Kalow ME, Faridi MK, Espinola JA, Klig JE, Camargo CA, Jr.  
11 697 Comparing Statewide and Single-center Data to Predict High-frequency Emergency  
12 698 Department Utilization Among Patients With Asthma Exacerbation. *Academic Emergency*  
13 699 *Medicine*. 2018;25(6):657-67. doi: 10.1111/acem.13342.  
14 700 120. Altman DG. *Practical statistics for medical research*. London: CRC press; 1990.  
15 701 121. Moe J, Bailey AL, Oland R, Levesque L, Murray H. Defining, quantifying, and  
16 702 characterizing adult frequent users of a suburban Canadian emergency department. *Can J*  
17 703 *Emerg Med*. 2013;15(4):214-26. doi: 10.2310/8000.2013.130936.  
18 704 122. Wajnberg A, Hwang U, Torres L, Yang S. Characteristics of frequent geriatric users  
19 705 of an urban emergency department. *J Emerg Med*. 2012;43(2):376-81. Epub 2011/11/02.  
20 706 doi: 10.1016/j.jemermed.2011.06.056. PubMed PMID: 22040771.  
21 707 123. Street M, Berry D, Considine J. Frequent use of emergency departments by older  
22 708 people: a comparative cohort study of characteristics and outcomes. *Int J Qual Health Care*.  
23 709 2018;30(8):624-9. Epub 2018/04/17. doi: 10.1093/intqhc/mzy062. PubMed PMID:  
24 710 29659863.  
25 711 124. Birmingham LE, Cochran T, Frey JA, Stiffler KA, Wilber ST. Emergency  
26 712 department use and barriers to wellness: A survey of emergency department frequent users.  
27 713 *BMC Emerg Med*. 2017;17(1). doi: 10.1186/s12873-017-0126-5.  
28 714 125. Kim JJ, Kwok ESH, Cook OG, Calder LA. Characterizing highly frequent users of  
29 715 a large Canadian urban emergency department. *West J Emerg Med*. 2018;19(6):926-33.  
30 716 doi: 10.5811/westjem.2018.9.39369.  
31 717 126. Klein LR, Martel ML, Driver BE, Reing M, Cole JB. Emergency Department  
32 718 Frequent Users for Acute Alcohol Intoxication. *Western Journal of Emergency Medicine:*  
33 719 *Integrating Emergency Care with Population Health*. 2018;19(2):398-402. doi:  
34 720 10.5811/westjem.2017.10.35052. PubMed PMID: 128442049. Language: English. Entry  
35 721 Date: 20180405. Revision Date: 20180405. Publication Type: Article.  
36 722 127. Kononenko I. Machine learning for medical diagnosis: history, state of the art and  
37 723 perspective. *Artif Intell Med*. 2001;23(1):89-109. Epub 2001/07/27. PubMed PMID:  
38 724 11470218.  
39 725 128. Hu X, Barnes S, Bjarnadóttir M, Golden B. Intelligent selection of frequent  
40 726 emergency department patients for case management: A machine learning framework  
41 727 based on claims data. *IISE Transactions Healthc Syst Eng*. 2017;7(3):130-43. doi:  
42 728 10.1080/24725579.2017.1351502.  
43 729 129. Liao S-H, Chu P-H, Hsiao P-Y. Data mining techniques and applications—A decade  
44 730 review from 2000 to 2011. *Expert systems with applications*. 2012;39(12):11303-11.  
45 731 130. Wang S, Summers RM. Machine learning and radiology. *Med Image Anal*.  
46 732 2012;16(5):933-51. Epub 2012/04/03. doi: 10.1016/j.media.2012.02.005. PubMed PMID:  
47 733 22465077; PubMed Central PMCID: PMC3372692.  
48 734 131. Kourou K, Exarchos TP, Exarchos KP, Karamouzis MV, Fotiadis DI. Machine  
49 735 learning applications in cancer prognosis and prediction. *Comput Struct Biotechnol J*.

- 1  
2  
3 736 2015;13:8-17. Epub 2015/03/10. doi: 10.1016/j.csbj.2014.11.005. PubMed PMID:  
4 737 25750696; PubMed Central PMCID: PMC4348437.
- 5 738 132. Ramos-Pollan R, Guevara-Lopez MA, Suarez-Ortega C, Diaz-Herrero G, Franco-  
6 739 Valiente JM, Rubio-Del-Solar M, et al. Discovering mammography-based machine  
7 740 learning classifiers for breast cancer diagnosis. *J Med Syst.* 2012;36(4):2259-69. Epub  
8 741 2011/04/12. doi: 10.1007/s10916-011-9693-2. PubMed PMID: 21479624.
- 9 742 133. Murdoch TB, Detsky AS. The inevitable application of big data to health care.  
10 743 *JAMA.* 2013;309(13):1351-2. Epub 2013/04/04. doi: 10.1001/jama.2013.393. PubMed  
11 744 PMID: 23549579.
- 12 745 134. Churpek MM, Yuen TC, Winslow C, Meltzer DO, Kattan MW, Edelson DP.  
13 746 Multicenter Comparison of Machine Learning Methods and Conventional Regression for  
14 747 Predicting Clinical Deterioration on the Wards. *Crit Care Med.* 2016;44(2):368-74. Epub  
15 748 2016/01/16. doi: 10.1097/CCM.0000000000001571. PubMed PMID: 26771782; PubMed  
16 749 Central PMCID: PMC4736499.
- 17 750 135. Hastie T, Tibshirani R, Friedman J. *The Elements of Statistical Learning.* New  
18 751 York: Springer; 2009.
- 19 752 136. Sanchez-Pinto LN, Luo Y, Churpek MM. Big Data and Data Science in Critical  
20 753 Care. *Chest.* 2018;154(5):1239-48. Epub 2018/05/13. doi: 10.1016/j.chest.2018.04.037.  
21 754 PubMed PMID: 29752973; PubMed Central PMCID: PMC6224705.
- 22 755 137. Johnson KW, Torres Soto J, Glicksberg BS, Shameer K, Miotto R, Ali M, et al.  
23 756 Artificial Intelligence in Cardiology. *J Am Coll Cardiol.* 2018;71(23):2668-79. Epub  
24 757 2018/06/09. doi: 10.1016/j.jacc.2018.03.521. PubMed PMID: 29880128.
- 25 758 138. Taylor RA, Pare JR, Venkatesh AK, Mowafi H, Melnick ER, Fleischman W, et al.  
26 759 Prediction of In-hospital Mortality in Emergency Department Patients With Sepsis: A  
27 760 Local Big Data-Driven, Machine Learning Approach. *Academic emergency medicine.*  
28 761 2016;23(3):269-78.
- 29 762 139. Jolliffe IT. *Principal Component Analysis and Factor Analysis.* Principal  
30 763 component analysis: Springer; 1986. p. 115-28.
- 31 764 140. Burgel PR, Paillasseur JL, Caillaud D, Tillie-Leblond I, Chanez P, Escamilla R, et  
32 765 al. Clinical COPD phenotypes: a novel approach using principal component and cluster  
33 766 analyses. *European Respiratory Journal.* 2010;36(3):531-9.
- 34 767 141. Gordon DB, Polomano RC, Pellino TA, Turk DC, McCracken LM, Sherwood G,  
35 768 et al. Revised American Pain Society Patient Outcome Questionnaire (APS-POQ-R) for  
36 769 quality improvement of pain management in hospitalized adults: preliminary psychometric  
37 770 evaluation. *J Pain.* 2010;11(11):1172-86. Epub 2010/04/20. doi:  
38 771 10.1016/j.jpain.2010.02.012. PubMed PMID: 20400379.
- 39 772 142. Gasquet I, Villemintot S, Estaquio C, Durieux P, Ravaud P, Falissard B.  
40 773 Construction of a questionnaire measuring outpatients' opinion of quality of hospital  
41 774 consultation departments. *Health Qual Life Outcomes.* 2004;2(1):43. Epub 2004/08/06.  
42 775 doi: 10.1186/1477-7525-2-43. PubMed PMID: 15294020; PubMed Central PMCID:  
43 776 PMC4516447.
- 44 777 143. Koenker R. *Quantile regression:* Cambridge university press; 2005.
- 45 778 144. Ding R, McCarthy ML, Desmond JS, Lee JS, Aronsky D, Zeger SL. Characterizing  
46 779 waiting room time, treatment time, and boarding time in the emergency department using  
47 780 quantile regression. *Academic Emergency Medicine.* 2010;17(8):813-23.



1  
2  
3  
4  
5  
6  
7  
8  
9  
10  
11  
12  
13  
14  
15  
16  
17  
18  
19  
20  
21  
22  
23  
24  
25  
26  
27  
28  
29  
30  
31  
32  
33  
34  
35  
36  
37  
38  
39  
40  
41  
42  
43  
44  
45  
46  
47  
48  
49  
50  
51  
52  
53  
54  
55  
56  
57  
58  
59  
60

781 145. Bottai M, Cai B, McKeown RE. Logistic quantile regression for bounded outcomes.  
782 Stat Med. 2010;29(2):309-17. Epub 2009/11/27. doi: 10.1002/sim.3781. PubMed PMID:  
783 19941281.

784

For peer review only

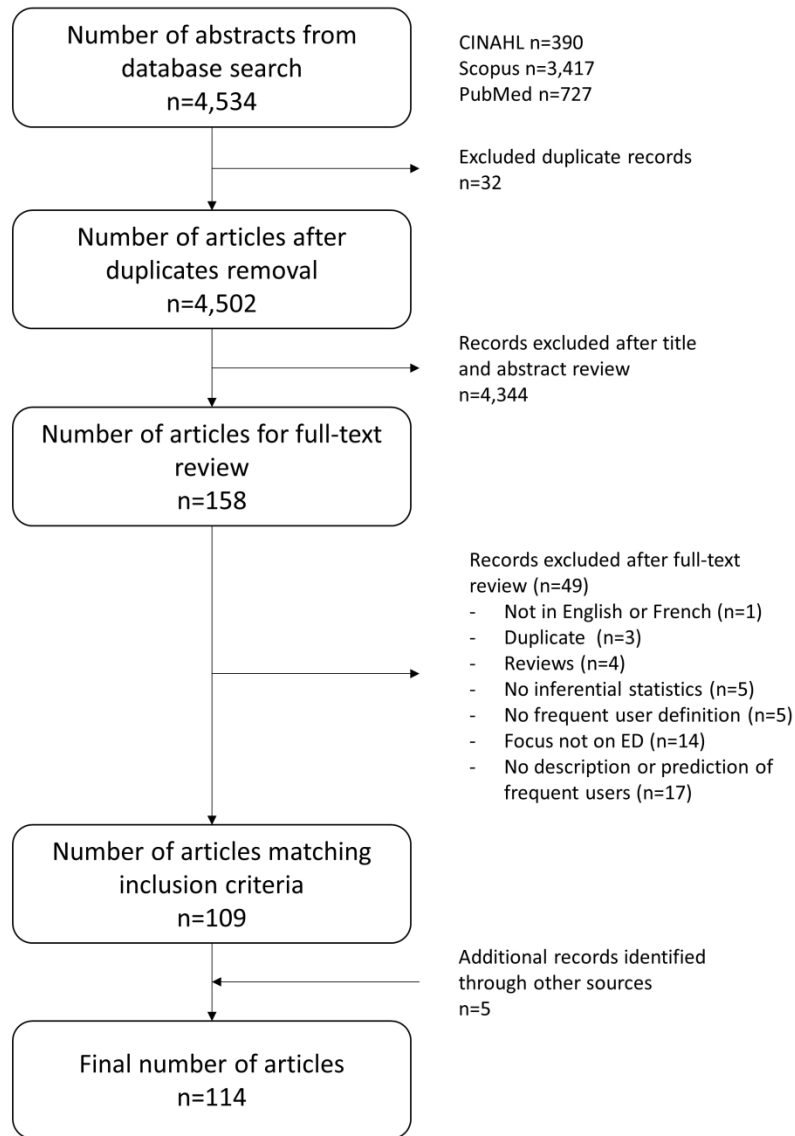

Fig 1. PRISMA flow diagram.

190x275mm (300 x 300 DPI)

1  
2  
3  
4  
5  
6  
7  
8  
9  
10  
11  
12  
13  
14  
15  
16  
17  
18  
19  
20  
21  
22  
23  
24  
25  
26  
27  
28  
29  
30  
31  
32  
33  
34  
35  
36  
37  
38  
39  
40  
41  
42  
43  
44  
45  
46  
47  
48  
49  
50  
51  
52  
53  
54  
55  
56  
57  
58  
59  
60

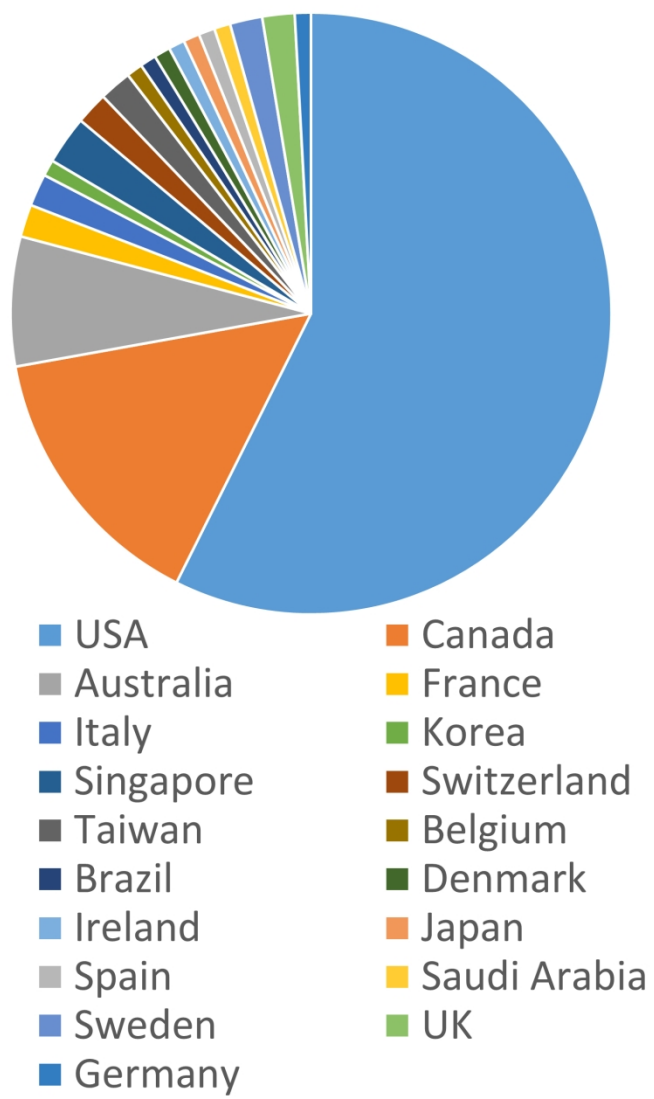

Fig 2. Number of studies by country.  
189x209mm (300 x 300 DPI)

Research strategies used in:

- **CINAHL:** ( "revolving door" OR (frequen\* OR high OR heavy OR repeat) N3 (hospital\* OR utili?ation OR attend\* OR consult\* OR visit\* OR flyer\* OR use\* OR patient\*)) AND "emergency department" AND ((statistic\* OR predict\* OR \*variate OR model\* OR "regression")
- **Scopus:** TITLE-ABS-KEY ( "revolving door" OR ( frequen\* OR high OR heavy OR repeat ) W/3 ( hospital\* OR utili?ation OR attend\* OR consult\* OR visit\* OR flyer\* OR use\* OR patient\* ) ) AND TITLE-ABS-KEY ( "emergency department" ) AND ( TITLE-ABS-KEY ( predict\* OR "univariate" OR "multivariate" OR model\* OR "regression" ) OR KEY ( {statistics and numerical data} ) ) AND ( EXCLUDE ( EXACTKEYWORD , "Controlled Study " ) OR EXCLUDE ( EXACTKEYWORD , " Comparative Study " ) OR EXCLUDE ( EXACTKEYWORD , "Clinical Trial" ) OR EXCLUDE ( EXACTKEYWORD , " Controlled Clinical Trial " ) )
- **PUBMED:** (((("Emergency Medical Services"[Mesh] OR emergency OR emergencies)) AND ("repeat use" OR "heavy user" OR "heavy users" OR "high attender" OR "high attenders" OR "high attendance" OR "high use" OR "high uses" OR "high user" OR "high users" OR "high utilisation" OR "high utilization" OR "frequent consultation" OR "frequent consultations" OR "frequent consultant" OR "frequent consultants" OR "frequent consult" OR "frequent consults" OR "frequent attender" OR "frequent attenders" OR "frequent attendance" OR "frequent visit" OR "frequent visits" OR "frequent visitor" OR "frequent visitors" OR "frequent flyer" OR "frequent flyers" OR "frequent use" OR "frequent uses" OR "frequent

1  
2  
3 user" OR "frequent users" OR "frequent utilisation" OR "frequent utilization" OR  
4  
5 "high consultation" OR "high consultations" OR "high consultant" OR "high  
6  
7 consultants" OR "high consult" OR "high consults" OR "frequent hospitalisation"  
8  
9 OR "frequent hospitalisations" OR "frequent hospitalization" OR "frequent  
10  
11 hospitalizations" OR "repeat hospitalisation" OR "repeat hospitalisations" OR  
12  
13 "repeat hospitalization" OR "repeat hospitalizations" OR "revolving door")) AND  
14  
15 ("Statistics"[Mesh] OR "predictive" OR "univariate" OR "multivariate" OR  
16  
17 "prediction" OR "model" OR "models" OR "modeling" OR "modelization" OR  
18  
19 "modelling" OR "modelisation" OR "regression")  
20  
21  
22  
23  
24  
25  
26  
27  
28  
29  
30  
31  
32  
33  
34  
35  
36  
37  
38  
39  
40  
41  
42  
43  
44  
45  
46  
47  
48  
49  
50  
51  
52  
53  
54  
55  
56  
57  
58  
59  
60

## Preferred Reporting Items for Systematic reviews and Meta-Analyses extension for Scoping Reviews (PRISMA-ScR) Checklist

| SECTION                                               | ITEM | PRISMA-ScR CHECKLIST ITEM                                                                                                                                                                                                                                                                                  | REPORTED ON PAGE #     |
|-------------------------------------------------------|------|------------------------------------------------------------------------------------------------------------------------------------------------------------------------------------------------------------------------------------------------------------------------------------------------------------|------------------------|
| <b>TITLE</b>                                          |      |                                                                                                                                                                                                                                                                                                            |                        |
| Title                                                 | 1    | Identify the report as a scoping review.                                                                                                                                                                                                                                                                   | 1                      |
| <b>ABSTRACT</b>                                       |      |                                                                                                                                                                                                                                                                                                            |                        |
| Structured summary                                    | 2    | Provide a structured summary that includes (as applicable): background, objectives, eligibility criteria, sources of evidence, charting methods, results, and conclusions that relate to the review questions and objectives.                                                                              | 2                      |
| <b>INTRODUCTION</b>                                   |      |                                                                                                                                                                                                                                                                                                            |                        |
| Rationale                                             | 3    | Describe the rationale for the review in the context of what is already known. Explain why the review questions/objectives lend themselves to a scoping review approach.                                                                                                                                   | 4                      |
| Objectives                                            | 4    | Provide an explicit statement of the questions and objectives being addressed with reference to their key elements (e.g., population or participants, concepts, and context) or other relevant key elements used to conceptualize the review questions and/or objectives.                                  | 4                      |
| <b>METHODS</b>                                        |      |                                                                                                                                                                                                                                                                                                            |                        |
| Protocol and registration                             | 5    | Indicate whether a review protocol exists; state if and where it can be accessed (e.g., a Web address); and if available, provide registration information, including the registration number.                                                                                                             | -                      |
| Eligibility criteria                                  | 6    | Specify characteristics of the sources of evidence used as eligibility criteria (e.g., years considered, language, and publication status), and provide a rationale.                                                                                                                                       | 5-6                    |
| Information sources*                                  | 7    | Describe all information sources in the search (e.g., databases with dates of coverage and contact with authors to identify additional sources), as well as the date the most recent search was executed.                                                                                                  | 5-6                    |
| Search                                                | 8    | Present the full electronic search strategy for at least 1 database, including any limits used, such that it could be repeated.                                                                                                                                                                            | Supplementary material |
| Selection of sources of evidence†                     | 9    | State the process for selecting sources of evidence (i.e., screening and eligibility) included in the scoping review.                                                                                                                                                                                      | 5-6                    |
| Data charting process‡                                | 10   | Describe the methods of charting data from the included sources of evidence (e.g., calibrated forms or forms that have been tested by the team before their use, and whether data charting was done independently or in duplicate) and any processes for obtaining and confirming data from investigators. | 6                      |
| Data items                                            | 11   | List and define all variables for which data were sought and any assumptions and simplifications made.                                                                                                                                                                                                     | 6                      |
| Critical appraisal of individual sources of evidence§ | 12   | If done, provide a rationale for conducting a critical appraisal of included sources of evidence; describe the methods used and how this information was used in any data synthesis (if appropriate).                                                                                                      | -                      |
| Synthesis of results                                  | 13   | Describe the methods of handling and summarizing the data that were charted.                                                                                                                                                                                                                               | 6-7                    |

| SECTION                                       | ITEM | PRISMA-ScR CHECKLIST ITEM                                                                                                                                                                       | REPORTED ON PAGE # |
|-----------------------------------------------|------|-------------------------------------------------------------------------------------------------------------------------------------------------------------------------------------------------|--------------------|
| <b>RESULTS</b>                                |      |                                                                                                                                                                                                 |                    |
| Selection of sources of evidence              | 14   | Give numbers of sources of evidence screened, assessed for eligibility, and included in the review, with reasons for exclusions at each stage, ideally using a flow diagram.                    | 6-7                |
| Characteristics of sources of evidence        | 15   | For each source of evidence, present characteristics for which data were charted and provide the citations.                                                                                     | 7-22               |
| Critical appraisal within sources of evidence | 16   | If done, present data on critical appraisal of included sources of evidence (see item 12).                                                                                                      | -                  |
| Results of individual sources of evidence     | 17   | For each included source of evidence, present the relevant data that were charted that relate to the review questions and objectives.                                                           | 7-22               |
| Synthesis of results                          | 18   | Summarize and/or present the charting results as they relate to the review questions and objectives.                                                                                            | 22-25              |
| <b>DISCUSSION</b>                             |      |                                                                                                                                                                                                 |                    |
| Summary of evidence                           | 19   | Summarize the main results (including an overview of concepts, themes, and types of evidence available), link to the review questions and objectives, and consider the relevance to key groups. | 25-28              |
| Limitations                                   | 20   | Discuss the limitations of the scoping review process.                                                                                                                                          | 28                 |
| Conclusions                                   | 21   | Provide a general interpretation of the results with respect to the review questions and objectives, as well as potential implications and/or next steps.                                       | 29                 |
| <b>FUNDING</b>                                |      |                                                                                                                                                                                                 |                    |
| Funding                                       | 22   | Describe sources of funding for the included sources of evidence, as well as sources of funding for the scoping review. Describe the role of the funders of the scoping review.                 | 29                 |

JBI = Joanna Briggs Institute; PRISMA-ScR = Preferred Reporting Items for Systematic reviews and Meta-Analyses extension for Scoping Reviews.

\* Where *sources of evidence* (see second footnote) are compiled from, such as bibliographic databases, social media platforms, and Web sites.

† A more inclusive/heterogeneous term used to account for the different types of evidence or data sources (e.g., quantitative and/or qualitative research, expert opinion, and policy documents) that may be eligible in a scoping review as opposed to only studies. This is not to be confused with *information sources* (see first footnote).

‡ The frameworks by Arksey and O'Malley (6) and Levac and colleagues (7) and the JBI guidance (4, 5) refer to the process of data extraction in a scoping review as data charting.

§ The process of systematically examining research evidence to assess its validity, results, and relevance before using it to inform a decision. This term is used for items 12 and 19 instead of "risk of bias" (which is more applicable to systematic reviews of interventions) to include and acknowledge the various sources of evidence that may be used in a scoping review (e.g., quantitative and/or qualitative research, expert opinion, and policy document).

From: Tricco AC, Lillie E, Zarin W, O'Brien KK, Colquhoun H, Levac D, et al. PRISMA Extension for Scoping Reviews (PRISMA-ScR): Checklist and Explanation. *Ann Intern Med.* ;169:467–473. doi: 10.7326/M18-0850

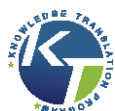

Supplement: bmjopen-2018-027750.draft_revisions.pdf [file bmjopen-2018-027750.draft_revisions.pdf]
