# Supplementary material for: Statistical tools used for analyses of frequent users of emergency department: a scoping review
Source: PubMed Central journal article supplement — BMJ Open. 2019 May 24;9(5):e027750. doi: 10.1136/bmjopen-2018-027750 (PMC6537981; doi:10.1136/bmjopen-2018-027750), 2019-05-24
Supplement: bmjopen-2018-027750supp001.pdf [file bmjopen-2018-027750supp001.pdf]

Research strategies used in:

- **CINAHL:** ( "revolving door" OR (frequen\* OR high OR heavy OR repeat) N3 (hospital\* OR utili?ation OR attend\* OR consult\* OR visit\* OR flyer\* OR use\* OR patient\*)) AND "emergency department" AND ((statistic\* OR predict\* OR \*variate OR model\* OR "regression")
- **Scopus:** TITLE-ABS-KEY ( "revolving door" OR ( frequen\* OR high OR heavy OR repeat ) W/3 ( hospital\* OR utili?ation OR attend\* OR consult\* OR visit\* OR flyer\* OR use\* OR patient\* ) ) AND TITLE-ABS-KEY ( "emergency department" ) AND ( TITLE-ABS-KEY ( predict\* OR "univariate" OR "multivariate" OR model\* OR "regression" ) OR KEY ( {statistics and numerical data} ) ) AND ( EXCLUDE ( EXACTKEYWORD , "Controlled Study " ) OR EXCLUDE ( EXACTKEYWORD , " Comparative Study " ) OR EXCLUDE ( EXACTKEYWORD , "Clinical Trial" ) OR EXCLUDE ( EXACTKEYWORD , " Controlled Clinical Trial " ) )
- **PUBMED:** (((("Emergency Medical Services"[Mesh] OR emergency OR emergencies)) AND ("repeat use" OR "heavy user" OR "heavy users" OR "high attender" OR "high attenders" OR "high attendance" OR "high use" OR "high uses" OR "high user" OR "high users" OR "high utilisation" OR "high utilization" OR "frequent consultation" OR "frequent consultations" OR "frequent consultant" OR "frequent consultants" OR "frequent consult" OR "frequent consults" OR "frequent attender" OR "frequent attenders" OR "frequent attendance" OR "frequent visit" OR "frequent visits" OR "frequent visitor" OR "frequent visitors" OR "frequent flyer" OR "frequent flyers" OR "frequent use" OR "frequent uses" OR "frequent

user" OR "frequent users" OR "frequent utilisation" OR "frequent utilization" OR  
"high consultation" OR "high consultations" OR "high consultant" OR "high  
consultants" OR "high consult" OR "high consults" OR "frequent hospitalisation"  
OR "frequent hospitalisations" OR "frequent hospitalization" OR "frequent  
hospitalizations" OR "repeat hospitalisation" OR "repeat hospitalisations" OR  
"repeat hospitalization" OR "repeat hospitalizations" OR "revolving door")) AND  
("Statistics"[Mesh] OR "predictive" OR "univariate" OR "multivariate" OR  
"prediction" OR "model" OR "models" OR "modeling" OR "modelization" OR  
"modelling" OR "modelisation" OR "regression")
